# Supplementary material for: Regulation of Follicular Development in Chickens: WIF1 Modulates Granulosa Cell Proliferation and Progesterone Synthesis via Wnt/β-Catenin Signaling Pathway
Source: MDPI journal article supplement (doi:10.3390/ijms25031788), 2024-02-01
Supplement: s1 [file s1]

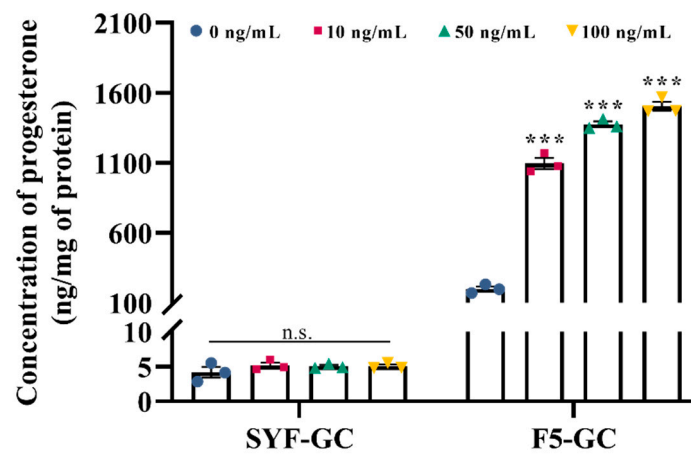

**Figure S1.** The concentration of progesterone in chicken GC after a 3-hour treatment with FSH.

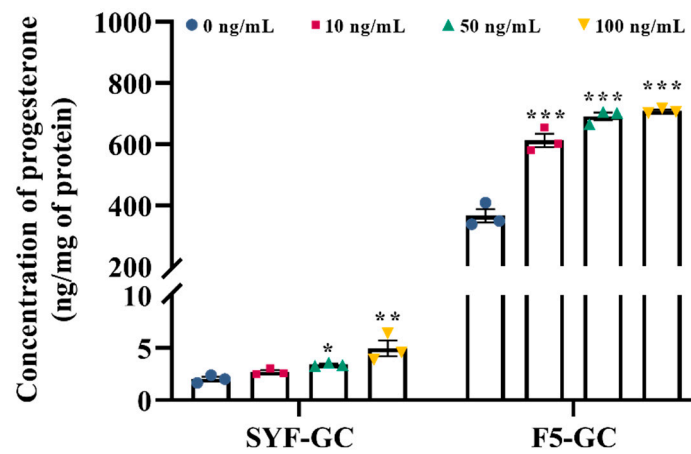

**Figure S2.** The concentration of progesterone in chicken GC after a 24-hour treatment with FSH.

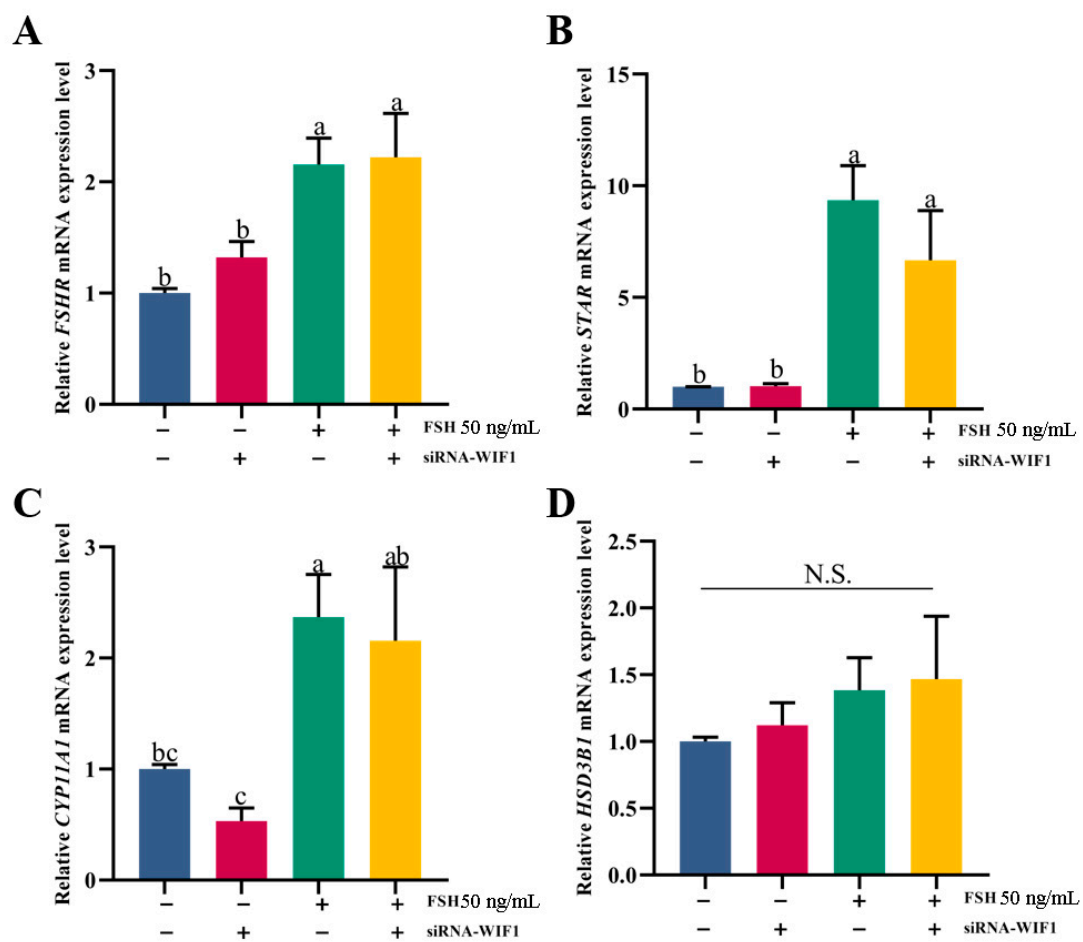

**Figure S3.** The mRNA expression levels of STAR, CYP11A1, HSD3B1 and FSHR in pre-GC with WIF1 knockdown.

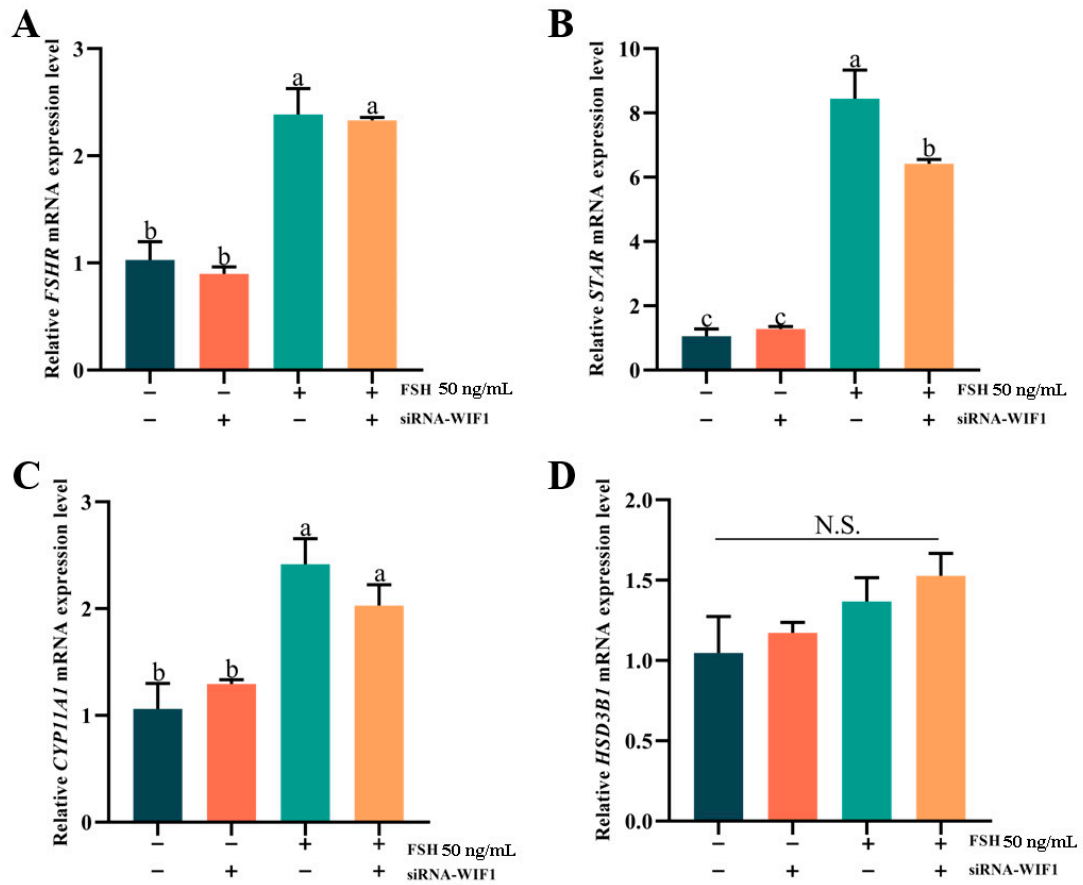

**Figure S4.** he mRNA expression levels of STAR, CYP11A1, HSD3B1 and FSHR in hie-GC with WIF1 knockdown.
