# Supplementary material for: Regulation of Follicular Development in Chickens: WIF1 Modulates Granulosa Cell Proliferation and Progesterone Synthesis via Wnt/β-Catenin Signaling Pathway
Source: Int J Mol Sci. 2024 Feb 1;25(3):1788. doi: 10.3390/ijms25031788 (PMC10855829; doi:10.3390/ijms25031788)
Supplement: Supplementary file 1 [file ijms-25-01788-s001.zip]

Archive with 6 entries (6 files):
- Supplemental Figure.pdf
- Table S1.xlsx
- Table S2.xlsx
- Table S3.xlsx
- Table S4.xlsx
- Table S5.xlsx
