# Supplementary material for: Regulation of Follicular Development in Chickens: WIF1 Modulates Granulosa Cell Proliferation and Progesterone Synthesis via Wnt/β-Catenin Signaling Pathway
Source: Int J Mol Sci. 2024 Feb 1;25(3):1788. doi: 10.3390/ijms25031788 (PMC10855829; doi:10.3390/ijms25031788)
Supplement: Supplementary file 1 [file ijms-25-01788-s001.zip › Table S1.xlsx]

## Sheet: Primer
Table S1. Primers used for quantitative qRT-PCR.
qRT-PCR target	Sense primer sequence (5'→3')	Antisense primer sequence (5'→3')	GenBank No	Size(bp)
β-actin	TATGTGCAAGGCCGGTTTC	TGTCTTTCTGGCCCATACCAA	NM_205518.2	110
WIF1	TGGCTTCTACGGCATCAACT	GCTCGCAGACAGGCTTTGAA	NM_001199607	233
PCNA	GCCACATTGGTGATGCTGTT	TCTTGTACTCCACAACGAGAGG	NM_204170	267
CDK1	TATACCCACAGCCATGGAGGA	GCATAAGAACATCCTGAAGACAGA	NM_205314	227
CDK2	TTTTGCTGAGATGGTGACGC	ATGCGCTTGTTGGGATCGTA	NM_001199857	249
CCNA1	GCAATTCTTCTGGCTGCGAAAT	ACTGGTTGATGGTTGGCACT	XM_004938747	163
CCNA2	TGCTGCTCGCATCGAAGT	TGCTCCATCCTCAGAACTTGC	NM_205244	106
CCNB1	GAGGCGTGTTTGTGTAGAGC	GATGCAGTCCGTTTTCTTGGG	NM_001004369	223
CCND1	GACCCGACGAGTTACTGCAAA	AGCTGCGATCATGGAAGGTG	NM_205381.1	218
CCND2	TGAGCACATCCTACGGAAGC	AAGCTTTAAGGCAGTCCACATC	NM_204213.1	257
CCNE1	GACTGGCTAATGGAGGTTTGTG	AAACTGGTGCAACTTTGGTGG	NM_001031358	192
CDKN1A	CTTCAACTTCGAGACCGAGAC	CTTGGAGCCGTAGAAGTCTTTG	NM_204396.2	274
CDKN1B	ACTTCTACTTCAGGCAGCCG	TTTGAGGAGAGGAATCGTCGG	NM_204256	234
STAR	TAGCATCGACCTGAAGGGCT	ACAGGCCGGAGTTGAATTGT	NM_204686.2	208
CYP11A1	TTTGGGCCCATCTACAGGGA	CAGGCCTCCCCTGTCTTGAG	NM_001001756	188
HSD3B1	GGGTTTGTTTAGCACTGAGGCAA	TCCAGCAGTAAGCGAACGAT	NM_205118.2	167
FSHR	TTCCAGCCTTCCCAAACTA	GCCGTAGAATCACACTTTCAG	NM_205079	257
CYP17A1	CAAGTGGGCTGTGCTCTACC	TGGAGTACTCACCGATGCTGG	NM_001001901	224
CYP19A1	TGTTCCATCACGCTATTT	GATTCTTGTTTGGGCTTC	NM_001001761	250
HSD17B1	CCGCAGGTTCAAAGTGTTCG	TTGCACACCAAGACGTCCG	NM_204837.1	183

## Sheet: Antibody
Table S1. Primary antibodies for Western Blot
Primary antibodies	Company	Catalog number	Dilution ratio
GAPDH	Bioss	bsm-52262R	1:5000
WIF1	Abclonal	A12969	1:1000
STAR	Absin	abs135712	1:1000
β-catenin	Abclonal	A0316	1:1000
phospho-β-catenin	Abclonal	AP0579	1:1000
			1:5000
