# Supplementary material for: Regulation of Follicular Development in Chickens: WIF1 Modulates Granulosa Cell Proliferation and Progesterone Synthesis via Wnt/β-Catenin Signaling Pathway
Source: Int J Mol Sci. 2024 Feb 1;25(3):1788. doi: 10.3390/ijms25031788 (PMC10855829; doi:10.3390/ijms25031788)
Supplement: Supplementary file 1 [file ijms-25-01788-s001.zip › Table S2.xlsx]

## Sheet: Sheet1
Table S2. Characteristics of the reads from 6 libraries
Samples	Clean reads(M)	Clean bases(G)	Multiple mapping rate(%)	Unique mapping rate(%)	Q20(%)	Q30(%)	GC Content(%)
NC_1	44.266252	6.624823	89.61	82.85	97.5993	93.5512	48.6185
NC_2	42.723778	6.396045	89.93	82.48	97.4627	93.2658	48.5959
NC_3	44.204084	6.616190	90.32	83.44	97.8372	94.0409	48.5272
OE_1	43.004686	6.433476	92.85	85.85	97.6615	93.6169	48.8985
OE_2	43.366274	6.491338	93.27	86.34	97.7522	93.8468	48.4132
OE_3	47.448878	7.101567	93.30	86.24	97.7937	93.9473	48.3671
