# Supplementary material for: Regulation of Follicular Development in Chickens: WIF1 Modulates Granulosa Cell Proliferation and Progesterone Synthesis via Wnt/β-Catenin Signaling Pathway
Source: Int J Mol Sci. 2024 Feb 1;25(3):1788. doi: 10.3390/ijms25031788 (PMC10855829; doi:10.3390/ijms25031788)
Supplement: Supplementary file 1 [file ijms-25-01788-s001.zip › Table S3.xlsx]

## Sheet: Sheet4
Table S3. Number of differentially expressed genes (DEGs)
	NC vs OE_WIF1
up	604
down	362
total	966

## Sheet: NC vs OE_WIF1
ENSEMBL	SYMBOL	log2FoldChange	padj	FPKM_NC_1	FPKM_NC_2	FPKM_NC_3	FPKM_OE_1	FPKM_OE_2	FPKM_OE_3	TREND
ENSGALG00010012361	WIF1	10.0896	0	6.71521	6.30728	4.96322	5364.52	4427.82	4391.07	up
ENSGALG00010017470	HSPA2	-2.75236	0	345.512	349.759	350.536	48.1199	45.9136	45.5681	down
ENSGALG00010019307	ATF3	1.3213	0	99.1701	98.3411	102.565	280.496	263.521	254.121	up
ENSGALG00010023206	HSPB9	-3.28042	0	614.769	601.614	610.796	52.4438	57.0665	52.5708	down
ENSGALG00010016870	LOC426093	1.67774	5.55228e-228	37.1251	38.1973	35.7539	92.0138	96.5958	102.575	up
ENSGALG00010015954	CTSA	1.32965	2.40658e-199	370.625	406.555	397.368	841.202	852.205	865.236	up
ENSGALG00010015706	EXOC3L	1.80469	2.84454e-188	8.6501	7.88279	8.92746	27.9009	29.7995	27.457	up
ENSGALG00010011386	CTSB	1.20862	6.43921e-178	389.577	429.544	432.489	842.186	856.908	879.272	up
ENSGALG00010019673	NID2	1.16037	1.67227e-175	97.6583	102.377	102.357	182.29	184.938	188.106	up
ENSGALG00010016006	PLTP	1.56155	1.6597e-174	73.2169	85.9777	82.5647	204.569	200.81	213.951	up
ENSGALG00010021717	SDC4	1.0216	1.07382e-154	227.002	234.179	234.802	430.25	464.793	432.692	up
ENSGALG00010024761	NECAB2	2.67309	1.93952e-146	2.98813	3.2961	2.73634	22.1419	18.3845	17.262	up
ENSGALG00010022502	LOC101747522	1.72155	5.43175e-144	17.4765	19.3006	17.67	49.7291	47.5633	49.2961	up
ENSGALG00010028898	TNFSF15	1.42405	3.61054e-134	6.35835	6.5361	6.8423	17.1938	17.5157	17.8755	up
ENSGALG00010006025	TNFAIP3	1.40997	1.39318e-118	21.2206	19.5492	20.302	56.2737	48.1561	47.7118	up
ENSGALG00010013402	MARCKS	-1.08917	8.22153e-114	90.9436	80.3035	90.2062	39.5084	39.0816	39.5182	down
ENSGALG00010024472	LDHA	1.02172	2.49694e-113	73.3518	78.9103	85.0412	160.16	148.117	157.663	up
ENSGALG00010024773	APOA1	1.56846	1.15754e-111	38.9646	45.8955	39.4205	99.3959	105.078	106.267	up
ENSGALG00010017431	FYCO1	1.22691	1.76872e-109	10.0004	9.46272	9.9648	22.7442	20.9006	20.6852	up
ENSGALG00010022656	FKBP10	1.22253	4.88744e-107	43.9	46.2422	46.5044	87.3043	86.438	87.2473	up
ENSGALG00010003814	TPP1	1.39494	2.67608e-104	32.4598	35.7077	34.6629	73.1696	75.5595	79.8151	up
ENSGALG00010010915	APP	1.10086	1.74825e-102	43.6204	48.8864	49.7386	92.6561	97.9745	101.481	up
ENSGALG00010017513	TNIP2	1.71542	3.31437e-101	6.73379	6.07752	7.39584	20.7113	21.9028	21.0228	up
ENSGALG00010010366	CLU	1.00358	3.71398e-99	293.941	326.891	316.513	507.279	517.577	541.202	up
ENSGALG00010000449	PLBD2	1.34157	1.759e-95	29.8258	30.1288	29.3616	62.1552	60.0292	67.3051	up
ENSGALG00010016973	PLSCR1	1.18018	4.50863e-95	31.3907	28.6044	33.7897	68.7048	70.3684	68.1266	up
ENSGALG00010022088	DKK3	1.07102	8.78198e-91	34.3104	35.5419	39.8932	71.5825	75.3534	73.79	up
ENSGALG00010009327	NID1	1.05875	3.83355e-89	13.1548	14.7871	14.5836	28.9671	28.8245	28.1869	up
ENSGALG00010001497	LEKR1	1.66361	6.08411e-84	3.60203	3.27676	3.27264	11.6632	10.9038	11.1235	up
ENSGALG00010010099	TNR	2.13664	1.46175e-83	0.996008	1.32715	1.15665	4.32428	4.31736	4.61341	up
ENSGALG00010013150	GNS	1.01445	9.62287e-82	132.532	145.97	150.861	277.825	296.15	293.797	up
ENSGALG00010021539	HEXA	1.31903	3.04225e-74	12.8286	15.436	15.3275	31.9951	31.5094	35.1038	up
ENSGALG00010011431	DRAM1	1.17063	8.99283e-74	15.0205	14.5647	15.0354	33.8502	36.7343	34.6279	up
ENSGALG00010008910	TRIB1	-1.13194	1.61657e-73	46.8687	45.965	43.9959	18.2872	19.5864	17.4734	down
ENSGALG00010018885	EFEMP1	1.24836	1.27853e-70	7.82515	8.35692	8.72973	18.5702	18.8711	19.6338	up
ENSGALG00010008087	CPNE8	1.22848	1.33389e-68	4.82439	5.07395	5.82184	18.2718	14.9224	14.2468	up
ENSGALG00010028042	DPP7	1.0814	3.18999e-68	31.4541	34.6745	31.036	59.6753	68.5797	66.9793	up
ENSGALG00010012349	IFNW1	1.99902	1.05125e-67	99.633	88.2836	91.2444	394.279	342.063	327.085	up
ENSGALG00010007763	FZD4	1.30861	7.95522e-65	4.93056	5.32384	5.77634	13.3359	11.6178	11.9269	up
ENSGALG00010015533	PSAT1	1.7511	9.20947e-65	3.01987	3.10337	3.15189	11.3923	10.4735	9.13394	up
ENSGALG00010017537	MANBA	1.39862	4.64549e-62	3.8405	5.25192	4.51387	12.7401	11.201	12.0395	up
ENSGALG00010019038	PLEKHS1	1.62807	3.36603e-60	2.75064	2.10278	2.12831	6.67628	6.65865	6.59856	up
ENSGALG00010003307	COL1A2	1.13064	1.6742e-58	9.14481	10.748	10.3265	19.847	20.3925	21.0614	up
ENSGALG00010010867	QSOX1	1.10986	5.40962e-58	25.2452	25.1406	27.6229	45.0886	47.6442	44.22	up
ENSGALG00010001385	MME	1.14006	7.34205e-57	4.76701	4.7141	4.57599	10.385	9.22165	10.0383	up
ENSGALG00010001298	DOCK4	1.00731	2.60415e-53	3.16546	3.4178	3.39111	6.63668	6.45999	7.04156	up
ENSGALG00010022202	CX3CL1	1.85163	1.37782e-51	2.1548	1.69848	1.96557	5.81005	6.46457	6.98621	up
ENSGALG00010027078	PDE12	-1.10813	2.10422e-51	33.7896	31.9062	30.3468	14.7833	14.1651	13.1012	down
ENSGALG00010013380	PHGDH	3.08084	2.41154e-51	1.76241	2.12102	0.684742	11.8052	12.7158	11.2146	up
ENSGALG00010021121	PLA2R1	1.1372	2.43554e-50	3.21269	3.46691	3.80765	7.48469	7.67646	7.84161	up
ENSGALG00010022412	CHAC1	1.71069	3.04052e-50	8.14463	9.5676	11.2291	29.0555	28.3982	25.0664	up
ENSGALG00010025286	ITGA3	1.07024	2.31152e-49	12.1665	13.3919	13.482	22.8375	21.5127	21.2494	up
ENSGALG00010009416	COL14A1	1.06051	4.86902e-49	2.444	2.46401	2.47139	5.62043	5.19247	5.40478	up
ENSGALG00010028872	SLC2A6	1.31436	7.20952e-48	11.8738	10.1019	11.8443	25.4144	24.1543	23.3932	up
ENSGALG00010015155	HMOX1	2.35345	2.55096e-47	28.6539	33.2603	29.7793	161.506	127.506	122.304	up
ENSGALG00010017349	#N/A	1.02095	9.39284e-47	36.1809	44.4597	38.3916	65.0783	63.732	65.4515	up
ENSGALG00010010461	SLC7A5	1.09782	2.41267e-46	11.4346	13.3592	13.3665	26.7405	23.9605	24.4881	up
ENSGALG00010004591	RRS1	-1.18939	3.91959e-46	124.406	110.236	97.3011	37.1938	37.779	39.3988	down
ENSGALG00010000145	PRODH	1.67643	7.72028e-46	3.17229	3.63677	3.63515	9.41212	10.27	9.90983	up
ENSGALG00010001712	ATP6AP1	1.18776	9.00242e-46	11.6563	10.4835	13.5759	26.5618	27.9558	30.2478	up
ENSGALG00010024963	TNFRSF6B	1.02917	1.10109e-45	40.4172	45.1399	47.7256	76.288	79.546	75.7398	up
ENSGALG00010016480	GPX3	1.05842	3.10386e-45	27.0007	24.7231	24.7189	34.3692	43.3726	42.5092	up
ENSGALG00010004325	LTBP2	1.60699	6.34923e-45	1.25633	1.30857	1.26898	3.21103	3.53852	3.55641	up
ENSGALG00010004663	LOC107052041	1.63284	1.01988e-44	2.08922	3.31512	2.53135	8.18108	8.77952	7.26681	up
ENSGALG00010020011	TLE3	-2.32693	9.55457e-44	5.0585	4.53245	3.882	0.575413	0.707869	1.10581	down
ENSGALG00010022837	ITGB3	1.67778	1.51125e-43	2.96859	2.2249	2.30723	7.37721	7.01362	7.45752	up
ENSGALG00010029723	ADORA2B	1.90534	1.61313e-43	1.77106	1.49991	1.82699	5.59759	5.75973	5.31355	up
ENSGALG00010016930	C10H15ORF48	1.12433	3.78419e-43	13.8077	12.9296	12.3926	23.1691	30.2899	26.1678	up
ENSGALG00010001409	GPNMB	1.9858	2.84572e-42	0.950009	1.21181	1.33468	3.91739	5.16769	4.62149	up
ENSGALG00010005057	FLVCR2	1.02259	5.09544e-41	11.7717	10.5635	10.7999	21.9281	19.0046	19.5267	up
ENSGALG00010027081	PDE4B	1.33017	3.15189e-40	3.73949	3.71121	4.29945	8.26627	8.26131	8.46767	up
ENSGALG00010027830	CACNA1D	1.06113	5.6638e-40	1.59037	1.58107	1.47251	3.47755	3.24206	3.1866	up
ENSGALG00010008456	NHLRC1	-1.48869	2.22022e-39	9.33316	9.40025	8.46902	3.41009	3.08718	2.93678	down
ENSGALG00010019524	HHIPL2	1.15647	4.51397e-39	5.90136	6.90828	6.74085	14.7938	13.9375	14.17	up
ENSGALG00010029768	KCNJ2	1.0267	1.00489e-37	3.29931	3.23763	3.26921	7.11173	6.64632	6.26088	up
ENSGALG00010029562	LOC395551	4.43591	1.88141e-37	0.911589	0	1.41742	14.4839	12.8479	17.456	up
ENSGALG00010014323	#N/A	1.75692	7.71581e-37	3.63759	3.20596	3.28646	11.5955	10.8717	9.1369	up
ENSGALG00010003543	SOX11	-1.01433	9.39668e-37	14.2578	11.5434	13.2679	4.97543	4.97649	3.99913	down
ENSGALG00010023888	CTH	1.0127	9.99747e-37	12.1716	13.4417	12.6568	23.0358	25.5915	24.6388	up
ENSGALG00010006134	K123	1.71823	1.05725e-36	3.854	2.77404	3.32769	9.29032	10.3616	10.3447	up
ENSGALG00010024946	KIF1A	1.24923	1.28929e-36	1.67365	1.9221	1.99099	3.33825	3.81197	3.84705	up
ENSGALG00010005122	IL8L1	1.93208	2.92538e-36	2.72164	2.13576	2.50474	10.4115	8.3982	8.67874	up
ENSGALG00010003330	HEY1	1.01991	5.62737e-36	36.7184	33.9695	37.8909	66.5486	61.218	57.5874	up
ENSGALG00010025275	#N/A	-1.32231	1.01273e-35	7.89947	7.63367	7.10995	2.8006	3.05344	2.94246	down
ENSGALG00010026005	DERL3	1.24469	2.59591e-35	3.48447	3.53797	3.75164	7.60121	8.60266	8.02865	up
ENSGALG00010013531	ARSI	3.76846	8.82076e-34	0.0621447	0.192626	0.122413	1.57231	1.08122	1.44136	up
ENSGALG00010010253	IL10RB	1.01667	2.37528e-33	12.1057	12.4983	11.8297	21.1353	24.4721	26.0211	up
ENSGALG00010005067	#N/A	1.22967	4.94704e-32	2.22115	2.5601	2.4983	5.58904	5.97146	5.7458	up
ENSGALG00010002693	MSC	3.44948	8.15774e-32	0.278456	0.462205	0.280425	3.29992	3.69324	2.84867	up
ENSGALG00010013434	CORIN	1.00834	1.11561e-31	3.17196	3.57686	3.83111	6.892	6.34371	7.12886	up
ENSGALG00010015050	HIVEP3	1.83366	1.22362e-31	0.416084	0.55041	0.537166	1.84702	1.57271	1.37288	up
ENSGALG00010027759	LOC107049024	2.02564	1.28432e-31	0.673074	0.820144	0.993329	3.43293	3.67003	2.85501	up
ENSGALG00010017927	PCSK2	1.55048	6.92946e-31	1.29678	1.38055	1.64552	3.54618	4.00327	4.46527	up
ENSGALG00010029740	GSG2	-1.56289	2.69592e-30	9.79512	9.23024	7.59784	2.68859	2.05145	2.95996	down
ENSGALG00010029196	MRM1	-1.27349	2.80245e-30	21.5677	20.5396	16.7196	7.25932	6.91346	6.93505	down
ENSGALG00010001705	HTRA1	1.29776	3.90591e-30	4.26267	5.16523	5.31457	11.5325	11.6443	11.2967	up
ENSGALG00010005070	ALB	1.37687	4.24006e-29	3.38448	3.17913	4.05834	9.74133	9.87038	8.16252	up
ENSGALG00010014122	ABCA1	1.88855	1.51339e-28	0.286346	0.340708	0.343102	0.915074	1.19854	1.39827	up
ENSGALG00010027231	ATP2B2	1.26931	1.12483e-27	1.22534	1.60394	1.6832	3.85874	3.74863	3.98096	up
ENSGALG00010002288	ANGPT2	1.07988	3.42707e-27	3.58069	4.27296	4.77489	8.87243	8.83275	8.40493	up
ENSGALG00010012996	#N/A	-1.80801	3.51144e-27	3.71104	3.40214	3.36872	1.03271	0.993571	0.942348	down
ENSGALG00010003743	ARL9	-1.19396	5.0985e-27	13.1991	14.4243	13.6235	5.70576	6.04895	5.6741	down
ENSGALG00010008176	SLA	1.26084	8.52483e-27	2.48336	2.85212	1.97903	4.95389	6.467	6.05579	up
ENSGALG00010003937	LOC121108129	1.18505	1.04233e-26	10.2685	9.9334	11.0073	17.0316	19.3246	17.0826	up
ENSGALG00010025563	TSPEAR	1.61814	1.79069e-26	1.50159	2.02158	1.85358	5.15519	5.1187	5.32361	up
ENSGALG00010008037	LY6CLEL	2.26266	2.44064e-26	2.55557	2.69304	3.30841	12.4426	10.3221	13.0832	up
ENSGALG00010019072	AEBP1	1.09161	6.49727e-26	3.41487	3.48824	3.46493	6.18619	5.62045	5.81314	up
ENSGALG00010007058	LOC121110149	2.02083	9.03738e-26	0.38922	0.28164	0.426733	1.57479	1.54604	1.46708	up
ENSGALG00010023235	IL23R	1.01561	1.09566e-25	3.34525	3.71786	3.758	6.44273	7.50447	6.37665	up
ENSGALG00010019285	BATF3	1.43664	1.32967e-25	4.76929	5.49558	6.13682	12.5845	15.9442	12.191	up
ENSGALG00010006621	DACT2	1.39796	2.30579e-25	1.76118	2.13536	1.72201	4.36682	4.76577	4.54838	up
ENSGALG00010013343	KIAA1644	1.7449	2.81974e-25	0.561314	0.476484	0.693959	1.98363	1.89417	2.06458	up
ENSGALG00010010361	PIGM	-1.43716	3.82408e-25	4.9545	5.84415	5.56358	1.69073	2.22847	1.88944	down
ENSGALG00010025304	DDX28	-1.02159	1.35225e-24	7.17649	6.29638	6.62707	3.62117	3.36952	3.07224	down
ENSGALG00010020211	ADD3	1.1716	2.0549e-24	2.01589	1.98073	2.42047	4.51207	5.44554	5.24647	up
ENSGALG00010011074	#N/A	3.11086	2.32924e-24	0.0907864	0.0234894	0.0611429	0.675409	0.527461	0.543558	up
ENSGALG00010012979	HTR1A	1.15282	2.7143e-24	5.85631	6.13332	6.08192	9.78857	12.229	11.3192	up
ENSGALG00010011497	CPQ	1.0482	4.05484e-24	6.99597	7.33324	7.57746	12.3649	13.287	15.3272	up
ENSGALG00010015061	MMP9	1.2479	5.17746e-24	5.0515	6.16663	5.05747	10.7077	10.2421	11.3055	up
ENSGALG00010024557	#N/A	1.62513	6.70653e-24	1.30484	1.20497	1.20689	3.74672	3.36911	3.31842	up
ENSGALG00010021234	ISLR2	1.29118	7.80006e-24	4.16393	4.9217	5.33533	8.79692	9.30027	9.90876	up
ENSGALG00010016958	TLR15	2.3965	1.66547e-23	0.294021	0.391218	0.390784	1.56523	1.83259	1.68323	up
ENSGALG00010023390	HSPB8	-1.67278	4.19052e-23	11.6054	11.4079	9.7531	3.56783	2.5581	2.25703	down
ENSGALG00010023187	LOC772158	-2.8531	4.69306e-23	61.9692	54.3123	60.0105	3.17687	3.91235	3.262	down
ENSGALG00010024525	GP1BB	-1.26141	1.96009e-22	4.82006	5.25128	5.33345	1.63436	1.9763	1.852	down
ENSGALG00010012069	LOC107048995	3.52614	2.10559e-22	0.187156	0.345521	0.152307	1.85206	2.96709	2.0438	up
ENSGALG00010002389	COL21A1	1.73925	2.41612e-22	0.440873	0.388278	0.706188	1.6625	1.73935	1.916	up
ENSGALG00010028924	TMEM203	-1.01523	3.31361e-22	19.1279	18.0698	18.8725	8.2747	9.69312	8.26741	down
ENSGALG00010029754	#N/A	-1.05696	3.4548e-22	11.1509	10.3405	9.90213	5.14221	4.39183	4.2172	down
ENSGALG00010029737	EVPL	2.05357	5.94759e-22	0.24823	0.245025	0.165156	0.827608	0.708156	0.810875	up
ENSGALG00010001941	IL6	1.15423	6.39147e-22	9.78606	6.55752	6.46969	17.3835	17.1143	16.0593	up
ENSGALG00010012406	PROB1	-2.67351	1.28634e-21	2.3557	1.92074	1.83455	0.217231	0.216559	0.437776	down
ENSGALG00010025071	CDK15	1.05046	1.75339e-21	2.74014	2.28828	2.97791	4.78343	5.55269	6.51973	up
ENSGALG00010010874	CD83	2.71228	2.44439e-21	0.196683	0.213216	0.277236	0.924035	1.26166	1.67164	up
ENSGALG00010011461	IRF4	1.64974	2.92127e-21	1.09395	1.69383	1.74013	4.09707	4.31266	5.2074	up
ENSGALG00010017579	P3H2	1.08106	5.06741e-21	3.00036	2.8966	3.40765	5.79734	5.76586	5.90425	up
ENSGALG00010027291	MST1	1.47651	8.73866e-21	2.01793	2.36564	2.72846	6.09921	6.0563	6.70562	up
ENSGALG00010015154	CYP24A1	1.57178	1.06317e-20	1.27225	1.55068	0.990109	3.9021	3.78158	3.30562	up
ENSGALG00010023612	GPT2	1.12239	1.51332e-20	1.84423	2.09494	2.27393	4.38555	3.98861	4.87582	up
ENSGALG00010013137	TMEM121	1.72622	1.59931e-20	1.21464	1.45249	1.80184	3.97089	4.93035	5.23699	up
ENSGALG00010027255	LOC107052490	-1.0914	1.8586e-20	23.093	22.0494	19.9074	7.07444	9.3274	7.14975	down
ENSGALG00010021294	#N/A	1.47419	3.15562e-20	1.73793	1.24662	1.05629	3.77355	3.05564	3.42657	up
ENSGALG00010005497	MKX	1.30241	6.18703e-20	1.1522	1.20971	1.21777	3.05231	3.19341	2.47003	up
ENSGALG00010012028	TMEM140	1.11595	6.256e-20	6.41526	8.58682	8.14798	14.9653	17.8698	20.0123	up
ENSGALG00010027117	RASSF5	1.90317	4.3253e-19	0.570768	0.52373	0.466722	1.75707	1.77995	1.9474	up
ENSGALG00010017505	TNFRSF8	1.09477	8.10012e-19	1.41959	1.38598	1.40528	2.84784	2.7225	2.75974	up
ENSGALG00010023778	FANCF	-1.47267	1.95238e-18	3.33069	3.5539	3.05711	1.30145	1.41413	1.07005	down
ENSGALG00010020695	LOC395991	-2.28227	2.3186e-18	2.27865	2.30729	2.68302	0.510713	0.49955	0.483024	down
ENSGALG00010017943	#N/A	-1.61531	2.90113e-18	14.0995	12.2196	10.1016	2.75543	3.99974	3.46114	down
ENSGALG00010008416	MSX2	1.93405	3.603e-18	0.751072	0.994897	0.856499	3.84677	2.86904	2.79985	up
ENSGALG00010029881	LOC417551	-1.39174	4.22597e-18	16.9116	10.6855	11.5706	5.33766	3.24017	3.6047	down
ENSGALG00010002661	ACBD7	1.01282	4.38975e-18	27.5289	21.6318	25.0299	43.1875	52.1946	49.1615	up
ENSGALG00010014897	COL8A2	-1.82647	6.41234e-18	1.4407	1.57707	0.935882	0.425954	0.295622	0.33801	down
ENSGALG00010016129	CENPI	-1.02202	7.61744e-18	3.83738	4.03453	3.97925	1.6249	1.83707	1.88608	down
ENSGALG00010029365	PIK3R5	2.74503	1.0731e-17	0.222394	0.134846	0.168715	0.685687	0.680615	0.829819	up
ENSGALG00010005585	LOC431250	1.45833	1.53582e-17	1.42562	1.71059	1.62574	3.9509	3.8412	2.75293	up
ENSGALG00010006024	AMER2	2.02611	2.30542e-17	0.163306	0.23993	0.216359	0.801513	0.778057	0.84385	up
ENSGALG00010008444	SLC7A11	1.75759	9.58028e-17	0.276713	0.497326	0.58801	1.74611	1.82335	1.57184	up
ENSGALG00010003298	IL7	1.44078	1.34943e-16	1.92887	1.68293	2.51477	4.85613	4.35947	5.23621	up
ENSGALG00010004065	TIFA	2.26293	1.67009e-16	0.468853	0.329006	0.536545	2.24312	2.38137	2.23971	up
ENSGALG00010014425	#N/A	-2.39006	3.02012e-16	1.22075	1.1132	1.14842	0.318273	0.138045	0.303849	down
ENSGALG00010005860	ABI3BP	1.56438	7.32867e-16	0.213194	0.249912	0.191419	0.691658	0.681049	0.670809	up
ENSGALG00010025242	CLSTN2	1.37134	7.41152e-16	0.701437	0.626367	0.815533	2.33273	1.89329	1.6863	up
ENSGALG00010000729	EDNRB	1.04873	1.06668e-15	1.75584	1.70678	2.54397	4.11065	4.53099	4.55449	up
ENSGALG00010025340	METTL21A	-1.12176	1.71045e-15	2.48527	2.00244	2.15639	0.870347	1.17325	0.968812	down
ENSGALG00010016968	C15orf61	-1.10362	1.80513e-15	29.9469	24.5829	25.0041	11.8544	11.9782	10.3743	down
ENSGALG00010028677	LOC107055358	-2.56646	3.05357e-15	3.80006	2.25119	2.54836	0.843904	0.435648	0.44617	down
ENSGALG00010023276	ABCC8	1.02481	3.34254e-15	1.12992	1.74408	1.37315	2.55128	3.19683	3.03143	up
ENSGALG00010019225	PROK2	1.42574	4.27773e-15	3.27276	3.95825	4.39994	8.72407	10.1115	9.27896	up
ENSGALG00010027275	CPAMD8	1.21909	6.36016e-15	0.726434	0.646305	0.983141	1.92304	1.91213	1.51935	up
ENSGALG00010026205	A2ML4	-1.30277	8.96174e-15	0.0602954	0.124766	0.0834401	0.0432138	0	0.0617595	down
ENSGALG00010018437	#N/A	-1.29584	1.32561e-14	6.82517	6.34588	6.92695	3.12124	3.37519	2.99124	down
ENSGALG00010016779	CTNNA2	1.03553	1.41089e-14	1.7552	2.56482	2.38064	4.28171	4.57396	4.54578	up
ENSGALG00010016376	#N/A	2.81159	2.19066e-14	0.0722245	0.0446203	0.0744174	0.487534	0.45928	0.331114	up
ENSGALG00010002987	PCDH8	1.33058	2.26901e-14	1.05271	1.04964	1.02589	2.77319	2.16692	2.35166	up
ENSGALG00010024695	TRABD2B	1.18617	2.43146e-14	1.65197	1.69146	1.71593	3.93898	3.55689	2.91972	up
ENSGALG00010004842	#N/A	1.50207	3.27369e-14	0.693485	0.822513	0.744908	2.15418	2.10982	1.78799	up
ENSGALG00010024762	FAN1	-1.089	4.81913e-14	2.24358	2.54912	2.7447	1.14186	1.01792	0.999785	down
ENSGALG00010016742	TRMT12	-1.17563	7.057e-14	4.76527	5.7635	5.59558	2.92893	2.45797	2.67116	down
ENSGALG00010019738	ADRA2A	1.01781	8.50575e-14	2.26163	2.38017	2.93767	4.50901	4.89397	4.34918	up
ENSGALG00010005244	FBXO5	-1.22229	1.1363e-13	4.25547	4.349	3.99797	1.35076	1.67279	2.12213	down
ENSGALG00010008302	#N/A	-1.25662	1.87042e-13	0.708745	0.588968	0.687053	0.380653	0.271386	0.266112	down
ENSGALG00010012995	SERINC2	1.13476	1.93794e-13	6.04121	8.50349	9.19095	15.3566	15.2903	13.0716	up
ENSGALG00010022554	SCG3	1.30655	2.42642e-13	0.547443	0.748388	0.719217	1.30806	1.86008	1.8634	up
ENSGALG00010026590	#N/A	-1.04458	2.5946e-13	1.39779	1.24452	1.36866	0.643367	0.773185	0.686739	down
ENSGALG00010010390	KCNK3	3.28095	4.08993e-13	0.104179	0.186531	0.0764937	0.969416	0.92895	0.935199	up
ENSGALG00010011345	CRMP1	1.3253	4.56537e-13	0.784066	0.892766	1.06708	2.28993	2.15503	1.96153	up
ENSGALG00010024053	ISL2	2.28896	5.90251e-13	2.12645	0.571171	0.354853	4.16968	4.12883	4.77396	up
ENSGALG00010018548	RGMA	-1.00248	6.65591e-13	5.05846	5.50497	4.65936	2.0479	2.30954	2.2473	down
ENSGALG00010017418	CHGB	1.41494	7.63234e-13	39.8766	53.0381	62.0888	121.689	122.054	144.402	up
ENSGALG00010020895	MIR147-1	1.21972	8.28052e-13	0	0	0	0	0	0	up
ENSGALG00010005314	IL20RA	1.45783	8.73245e-13	1.04445	1.33567	0.811391	2.65422	2.76704	2.64372	up
ENSGALG00010026366	#N/A	-1.4664	9.27738e-13	1.67611	2.4093	2.24152	0.912578	0.699202	0.685731	down
ENSGALG00010024920	VIPR2	1.32968	1.20219e-12	1.03124	1.14399	1.70835	3.69355	3.03887	3.36615	up
ENSGALG00010010499	NR4A2	1.26567	1.263e-12	2.05256	1.70344	1.33476	4.133	3.69493	2.9388	up
ENSGALG00010029213	APOH	1.27321	2.21826e-12	2.45806	3.8803	3.10316	6.49765	7.41293	8.39599	up
ENSGALG00010027363	VIPR1	1.36214	2.55215e-12	1.00062	1.1123	1.77762	2.41406	2.35689	3.49215	up
ENSGALG00010022550	TRIM45	-1.35359	2.70101e-12	6.3828	6.27207	5.25848	2.11474	2.74297	1.48673	down
ENSGALG00010026828	#N/A	1.57005	4.25615e-12	1.34452	0.726362	0.889017	4.0274	2.38453	2.37631	up
ENSGALG00010010410	CACNA2D1	1.05966	4.32018e-12	1.43457	0.601779	2.58247	2.33381	2.42094	1.48928	up
ENSGALG00010003771	SPARCL1	2.19137	4.80583e-12	0.137331	0.339003	0.27799	1.43063	1.55724	1.05648	up
ENSGALG00010016332	ZKSCAN7	-1.11477	4.98859e-12	4.38263	5.47037	5.70641	1.57521	2.42143	1.83934	down
ENSGALG00010027538	#N/A	-1.02185	6.1687e-12	11.8001	12.6119	11.94	5.22292	4.41432	7.31497	down
ENSGALG00010027660	#N/A	1.35964	6.35597e-12	1.1901	1.49485	1.47746	2.89634	4.36261	3.54579	up
ENSGALG00010018773	#N/A	2.7667	7.27949e-12	0.0887433	0.164511	0.195248	0.919405	0.687281	0.711095	up
ENSGALG00010015020	NIPAL4	1.26762	7.50779e-12	1.59345	1.48432	1.82407	3.15042	4.2948	4.35267	up
ENSGALG00010022776	CDH4	2.01577	7.58416e-12	0.153893	0.135877	0.154361	0.734038	0.442924	0.459403	up
ENSGALG00010019620	#N/A	-1.43095	1.01785e-11	0.770062	0.801486	0.806068	0.311895	0.32301	0.314622	down
ENSGALG00010017715	CILP	3.69957	1.12972e-11	0.0224146	0.0233754	0.0332359	0.461849	0.271315	0.317322	up
ENSGALG00010022100	ENTPD1	1.87714	1.23964e-11	0.278683	0.211016	0.370571	0.769157	1.01806	0.91213	up
ENSGALG00010025720	FAM109A	-1.02404	1.36435e-11	8.94126	9.31302	5.77994	3.20288	3.85528	3.88712	down
ENSGALG00010027430	#N/A	1.09449	1.84833e-11	1.10589	1.55638	1.3784	2.53347	2.51356	3.30851	up
ENSGALG00010001783	SGO1	-1.05144	1.88079e-11	2.55657	2.27405	1.95039	1.03562	1.22203	1.03846	down
ENSGALG00010026315	SYT2	1.53913	2.64931e-11	0.804809	0.816147	0.538171	1.96004	2.19173	2.06006	up
ENSGALG00010001612	HPX	1.09939	2.69381e-11	4.73594	7.83901	8.48669	10.7078	13.9814	13.687	up
ENSGALG00010001244	LOC121108916	1.47377	2.79135e-11	3.68053	1.78071	3.51037	7.46196	7.14378	6.9293	up
ENSGALG00010029179	PIGW	-1.01036	2.95281e-11	6.91908	6.37744	4.42602	2.13192	2.54531	2.49899	down
ENSGALG00010023194	MRC2	1.24854	5.54965e-11	0.712235	0.680667	0.522146	1.09542	1.24562	1.40009	up
ENSGALG00010004398	COX18	-1.03044	7.16656e-11	1.89163	1.72973	1.70462	1.01579	0.988016	0.849875	down
ENSGALG00010016355	MCF2L2	1.40114	9.23912e-11	0.242024	0.459473	0.290274	0.882023	0.838681	0.776369	up
ENSGALG00010028079	ITIH3	1.6484	1.01241e-10	0.24529	0.27156	0.200856	0.985607	1.02691	0.817612	up
ENSGALG00010000061	SERINC4	-1.25967	1.25337e-10	2.94867	1.75382	2.15124	1.25234	0.793987	1.23498	down
ENSGALG00010001704	DCHS1	1.29207	1.29663e-10	0.310687	0.454668	0.313562	0.70557	0.711989	0.74916	up
ENSGALG00010025077	#N/A	-1.40098	1.6937e-10	2.44749	2.02281	2.43209	0.548171	0.931557	0.882595	down
ENSGALG00010021439	ITPRIP	1.07088	1.96065e-10	0.629901	0.594143	0.698008	1.39765	1.188	1.37251	up
ENSGALG00010012171	CDH17	1.71127	2.27271e-10	0.192341	0.162955	0.305711	0.812463	0.678539	0.647409	up
ENSGALG00010005399	NDNF	-1.03297	2.65619e-10	3.42	3.48317	2.81305	1.50964	1.53042	1.42656	down
ENSGALG00010016867	FLT4	1.03051	2.74431e-10	0.838163	0.593297	0.697696	1.38516	1.16204	1.33943	up
ENSGALG00010005903	PRR18	-1.9675	2.90766e-10	4.31318	6.89304	7.31402	1.12753	0.910297	1.65057	down
ENSGALG00010010517	STMN4	2.44603	3.00144e-10	0.244607	0.255547	0.177853	0.944354	1.1951	1.10747	up
ENSGALG00010007536	GABBR2	1.02297	3.084e-10	1.11444	1.44804	1.09624	2.32514	2.101	2.36508	up
ENSGALG00010004039	ALPK1	1.85669	3.5517e-10	0.161021	0.16848	0.484649	0.842498	0.778214	0.807435	up
ENSGALG00010022264	SCN8A	1.66262	3.5665e-10	0.167413	0.185801	0.133439	0.467224	0.465724	0.546588	up
ENSGALG00010024223	LOC429785	1.97206	4.36092e-10	0.188955	0.614384	0.43279	1.31781	1.44395	1.69577	up
ENSGALG00010012909	#N/A	2.78854	4.41812e-10	0.158048	0.432768	0.139067	1.82391	1.74812	1.61224	up
ENSGALG00010014527	#N/A	-1.0798	4.93204e-10	2.67267	2.89267	3.32594	1.32652	1.33146	1.53248	down
ENSGALG00010021379	#N/A	1.89478	6.09462e-10	0.431524	0.395882	0.310594	1.21133	1.16352	1.16913	up
ENSGALG00010025999	DBF4B	-1.03246	7.91465e-10	4.24061	3.44185	3.62647	1.29606	1.46953	1.61597	down
ENSGALG00010003538	RNA28S19	-1.89788	8.68619e-10	0.164293	0.0562617	0.0794502	0.0229957	0.0971824	0.0439939	down
ENSGALG00010015937	#N/A	-1.28973	9.57324e-10	2.11727	2.17209	1.87527	0.583568	0.818011	0.433892	down
ENSGALG00010021360	PTPRN	1.07118	9.8684e-10	2.07863	1.93735	2.26276	3.96205	3.45249	3.49444	up
ENSGALG00010029771	SOX9	1.08751	9.8684e-10	1.25398	1.19784	1.13196	2.73895	2.19264	2.34019	up
ENSGALG00010029747	TRPV3	-1.13862	1.11406e-09	1.67035	1.29156	1.54156	0.458471	0.712786	0.544043	down
ENSGALG00010006285	FZD8	-1.01677	1.22176e-09	13.8045	10.558	9.07269	4.39409	4.18609	4.65542	down
ENSGALG00010009324	NKX2-5	2.57566	1.72462e-09	0.315954	0.362171	0.137878	1.16495	1.08774	1.43041	up
ENSGALG00010023075	PKDREJ	-1.43117	1.75177e-09	0.625333	0.727621	0.717608	0.293211	0.248567	0.194936	down
ENSGALG00010006612	#N/A	-1.27449	1.81404e-09	12.6478	10.6985	11.4229	2.84242	2.75579	3.9894	down
ENSGALG00010015021	RBM46	-1.8284	2.39427e-09	0.771913	1.10195	0.945222	0.244336	0.306073	0.239909	down
ENSGALG00010027212	IRF6	1.4355	2.70028e-09	0.764292	0.872016	0.895579	1.74525	2.36364	2.32899	up
ENSGALG00010023149	ADGRD1	1.94188	3.02121e-09	0.191214	0.061061	0.125127	0.453195	0.419257	0.437787	up
ENSGALG00010021106	ITGB6	1.42062	3.45534e-09	0.310758	0.196716	0.248097	0.676075	0.594296	0.727231	up
ENSGALG00010021281	#N/A	2.12193	3.63861e-09	0.101566	0.146872	0.105887	0.443405	0.472064	0.487435	up
ENSGALG00010003528	GDAP1	-1.52668	4.39726e-09	1.238	0.865604	0.788183	0.330813	0.382731	0.305563	down
ENSGALG00010021450	OLFML1	1.09961	4.56344e-09	0.737207	0.730239	0.538122	1.53347	1.53723	1.78339	up
ENSGALG00010006540	#N/A	-1.57021	6.45114e-09	1.85216	2.37579	1.05508	0.54488	0.704599	0.22107	down
ENSGALG00010020593	#N/A	-1.64314	7.37808e-09	4.04943	2.56604	3.68542	1.41304	0.951214	0.824747	down
ENSGALG00010006341	HHIP	2.68966	7.44805e-09	0.094254	0.0710492	0.0677735	0.545427	0.644863	0.467352	up
ENSGALG00010010147	GLIS3	1.07231	7.65732e-09	1.20581	1.10385	0.856674	2.24269	1.67909	2.31875	up
ENSGALG00010007857	LOC419112	1.16501	9.58843e-09	2.3479	2.89555	2.57196	4.5032	4.85138	6.42487	up
ENSGALG00010023695	CLSTN3	1.13685	1.05343e-08	0.967379	0.759136	1.00471	1.84843	1.65922	1.74761	up
ENSGALG00010011244	PDE9A	2.25497	1.07617e-08	0.159905	0.0455592	0.102982	0.691785	0.307518	0.423326	up
ENSGALG00010027311	NFASC	1.6487	1.24503e-08	0.173891	0.122045	0.0853833	0.334059	0.385927	0.379043	up
ENSGALG00010020417	ZP1	-3.37655	1.40175e-08	0.288321	0.28074	0.59383	0.114527	0.0488377	0.080875	down
ENSGALG00010027616	SLC38A3	-1.90553	1.5008e-08	1.10807	0.94364	0.94489	0.296347	0.270818	0.211676	down
ENSGALG00010016543	TCEA3	2.23256	1.76608e-08	0.143289	0.149923	0.209619	0.895652	0.931768	0.675597	up
ENSGALG00010017882	LZTS3	3.32085	1.99634e-08	0.0523598	0.0182043	0.0515886	0.269642	0.307737	0.476856	up
ENSGALG00010004577	ZPLD1	2.16475	2.00849e-08	0.0944217	0.199325	0.29846	0.926562	0.872071	0.59868	up
ENSGALG00010001919	LOC429348	-2.61204	2.56686e-08	0.795905	0.940106	0.745516	0.20139	0.0658234	0.10101	down
ENSGALG00010022921	INPP1	1.1183	2.7261e-08	2.51648	2.22355	2.15992	3.59864	3.53991	3.64421	up
ENSGALG00010024835	FAM189A1	1.30366	4.32223e-08	0.883068	0.766464	0.663044	2.59904	1.32051	1.62238	up
ENSGALG00010024688	CADM1	1.45234	4.80189e-08	0.346247	0.553929	0.61298	1.14416	1.35014	1.14267	up
ENSGALG00010003618	RNA5-8S16	-2.26094	5.00672e-08	0	0	0	0	0	0	down
ENSGALG00010018384	LAMP5	1.33611	5.54034e-08	0.907721	0.981932	0.945268	1.68008	2.30854	1.91743	up
ENSGALG00010024924	MNX1	1.43021	5.75919e-08	2.59748	1.89097	2.81927	7.70022	4.87772	5.03326	up
ENSGALG00010002954	CHST7	-1.24672	7.15325e-08	10.1971	10.4179	9.67236	2.33267	3.83674	2.60153	down
ENSGALG00010015485	BCAS1	1.11992	7.28174e-08	1.03002	1.42976	1.22137	2.21792	2.06762	3.20477	up
ENSGALG00010020986	C3orf67	1.21596	8.67142e-08	0.417775	0.470775	0.621788	1.03259	1.40771	1.37286	up
ENSGALG00010005010	NKAIN2	1.07386	9.20495e-08	0.901294	0.636127	1.17339	1.51121	2.31239	1.51127	up
ENSGALG00010012436	CFH	2.80004	1.21417e-07	0.0300465	0.015883	0.0154834	0.108392	0.149349	0.138822	up
ENSGALG00010006440	#N/A	1.66328	1.22146e-07	0.278242	0.29727	0.176745	0.717249	0.584743	0.684377	up
ENSGALG00010019291	ADD2	-2.04991	1.25847e-07	0.850223	0.683768	1.12542	0.149468	0.153112	0.27845	down
ENSGALG00010029649	PSPH	1.28606	1.3135e-07	2.73775	1.93767	2.60424	5.49765	4.22504	5.56439	up
ENSGALG00010021897	ST3GAL8	-1.25396	1.37702e-07	1.51651	1.53266	1.37339	0.404156	0.387994	0.594931	down
ENSGALG00010008194	#N/A	-1.10703	1.43407e-07	16.2521	17.0821	17.8289	4.29115	7.76228	6.92249	down
ENSGALG00010017378	LOC422926	-1.95086	1.44835e-07	0.748036	0.572803	0.639622	0.165272	0.258771	0.106166	down
ENSGALG00010017917	CYP2AB5	1.18881	1.51065e-07	0.898248	0.666049	0.791886	1.8491	1.44216	1.52914	up
ENSGALG00010004036	ADCYAP1	2.19027	1.51937e-07	0.640672	0.31576	0.184458	1.00914	1.28686	1.3254	up
ENSGALG00010023554	#N/A	-1.5729	1.72055e-07	0.547319	0.617357	0.496354	0.304882	0.171726	0.159204	down
ENSGALG00010025042	BCO2	1.72119	1.913e-07	0.253336	0.210792	0.292869	1.26632	0.858075	0.670736	up
ENSGALG00010027157	CD55	1.05497	2.06875e-07	1.44308	1.05501	1.66192	2.52046	2.60388	3.01321	up
ENSGALG00010001113	IGSF10	1.23642	2.13945e-07	0.197395	0.437401	0.328818	0.594103	0.704916	0.719606	up
ENSGALG00010025935	CATH3	-2.04154	2.80322e-07	0.5257	1.43902	0.896657	0.0286481	0.137161	0.710529	down
ENSGALG00010002142	CLDN34	-1.79338	2.97432e-07	1.99503	0.888867	0.83062	0.248709	0.731316	0.161625	down
ENSGALG00010013828	PTN	1.94078	3.35834e-07	0.129856	0.0963053	0.0561267	0.840916	0.539584	0.484711	up
ENSGALG00010023970	#N/A	1.18537	3.4248e-07	0.50186	0	0	0	1.06038	0	up
ENSGALG00010001476	IGF2BP3	1.05664	3.74173e-07	0.679671	0.77008	1.01036	1.71227	1.77046	1.90338	up
ENSGALG00010027743	C1orf74	-1.10711	3.74173e-07	13.9005	10.067	8.45577	4.97405	3.04815	4.66714	down
ENSGALG00010019325	SLITRK4	2.3839	3.98258e-07	0.0285476	0.0786069	0.0297136	0.246075	0.176118	0.20474	up
ENSGALG00010007695	RASGRP3	1.37537	4.36039e-07	0.171634	0.235236	0.273453	1.02012	1.13346	1.04103	up
ENSGALG00010004976	HSD17B11	1.21629	4.63383e-07	0.856925	0.655189	0.993484	2.16473	1.85026	1.87935	up
ENSGALG00010010309	#N/A	3.60271	4.72975e-07	0.0196099	0.0518036	0	0.242761	0.252408	0.158978	up
ENSGALG00010004340	SLC4A4	1.67609	5.19177e-07	0.19659	0.0843526	0.158687	0.422	0.534271	0.380544	up
ENSGALG00010021189	LOC100858984	-1.64655	5.28982e-07	12.3779	16.2993	14.3274	2.36719	3.99158	3.68049	down
ENSGALG00010012347	LOC414835	1.24327	5.37211e-07	0.233256	0.170875	0.211634	0.475708	0.344924	0.394902	up
ENSGALG00010021046	PDPN	-1.10543	6.01758e-07	1.40577	2.19515	2.54496	1.21031	0.745043	1.07785	down
ENSGALG00010024964	ITM2C	1.55494	6.27423e-07	0.362207	0.241885	0.392626	1.12803	1.0725	0.753254	up
ENSGALG00010017983	SLC4A11	1.79752	6.39536e-07	0.0782637	0.211487	0.132744	0.521496	0.369636	0.426617	up
ENSGALG00010021952	#N/A	-1.32971	6.52663e-07	1.12607	0.520351	0	0.347774	0.372678	0.703333	down
ENSGALG00010029164	CYB5D2	-1.05879	7.12357e-07	2.87086	3.46495	3.17889	1.52266	0.860957	1.31859	down
ENSGALG00010007027	#N/A	-1.39749	7.15569e-07	1.58715	1.43825	1.37155	0.488406	0.58196	0.79584	down
ENSGALG00010009991	LHFPL3	1.30927	7.99657e-07	0.435418	0.533521	0.461021	1.01152	1.99141	1.34436	up
ENSGALG00010018510	MRPL43	-1.02015	8.02321e-07	4.3769	3.69233	5.61849	2.59443	2.13485	2.64809	down
ENSGALG00010017844	#N/A	-2.74316	8.03058e-07	1.07108	0.906622	1.4854	0.145297	0.22425	0.345795	down
ENSGALG00010023136	MDK	-2.01972	8.0751e-07	2.65116	1.97933	2.53288	0.461914	0.685616	0.454635	down
ENSGALG00010020794	STEAP3	1.3324	8.11896e-07	0.604351	0.673884	0.730767	1.61537	1.21115	1.45168	up
ENSGALG00010020009	MACROD2	1.40325	8.55396e-07	1.11126	1.06462	0.983122	2.80464	2.74004	2.54465	up
ENSGALG00010005368	CCDC3	1.19103	9.26092e-07	0.734066	0.601437	0.681946	1.45037	1.31174	1.72398	up
ENSGALG00010024079	#N/A	1.09079	9.62471e-07	2.42588	2.32242	1.48563	4.51783	3.73456	3.65053	up
ENSGALG00010019829	#N/A	3.16509	1.06474e-06	0.0484056	0.0166779	0.0486534	0.357231	0.30287	0.220418	up
ENSGALG00010009309	TRIM54	1.2614	1.09908e-06	1.38711	2.3631	2.29059	3.66956	5.66295	4.04927	up
ENSGALG00010029107	#N/A	1.38333	1.14532e-06	0.652174	0.910665	0.916323	2.74931	2.73333	2.41078	up
ENSGALG00010021045	DPP4	2.32016	1.16034e-06	0.0850598	0.0543745	0.0670034	0.284567	0.232831	0.254507	up
ENSGALG00010012030	IFNL3A	3.81962	1.3218e-06	0	0	0.202986	0.812589	1.40808	0.694575	up
ENSGALG00010010889	CCL19	4.69624	1.36843e-06	0	0.0861544	0	0.609577	0.712035	0.509874	up
ENSGALG00010021877	PLEKHN1	1.68162	1.40193e-06	0.147963	0.349439	0.252483	1.07026	0.639469	0.919596	up
ENSGALG00010023449	#N/A	-1.04527	1.57275e-06	1.00636	1.0511	0.881043	0.555157	0.30677	0.464481	down
ENSGALG00010018497	ASTE1	-1.13063	1.59716e-06	4.80395	3.67149	5.18277	1.26481	1.54322	2.545	down
ENSGALG00010008123	LOC121112980	1.05303	2.01389e-06	2.32804	2.08818	2.2954	5.31569	3.0677	3.56821	up
ENSGALG00010025480	FGF19	2.73619	2.0974e-06	0.152229	0.242081	0.0261647	0.9472	0.730343	0.507507	up
ENSGALG00010010720	#N/A	-1.53855	2.1241e-06	3.02934	2.86076	2.78331	0.998355	0.85391	0.796915	down
ENSGALG00010008190	TSNARE1	1.13802	2.31961e-06	1.18216	1.67983	1.65959	2.75847	2.097	2.89147	up
ENSGALG00010010301	CDHR3	1.74305	2.36268e-06	0.39167	0.0985465	0.188413	0.211646	0.763106	0.307645	up
ENSGALG00010024985	LOC124417128	-1.32872	2.44066e-06	3.44418	2.8747	2.34357	1.19437	0.674293	1.04389	down
ENSGALG00010004397	#N/A	-1.31943	2.55727e-06	0.363332	0.495874	0.433741	0.178537	0.147942	0.182465	down
ENSGALG00010024396	#N/A	-1.18548	2.60611e-06	1.19611	1.05334	0.786075	0.505089	0.393939	0.521922	down
ENSGALG00010004534	CUBN	1.00505	2.61209e-06	0.192591	0.18747	0.270675	0.338731	0.36025	0.337092	up
ENSGALG00010000870	DACH1	1.77434	2.88923e-06	0.2162	0.0849888	0.102486	0.313543	0.467378	0.379605	up
ENSGALG00010023748	LOC418298	-2.39992	3.12157e-06	1.09646	0.435026	0.747684	0.121139	0.217391	0.110906	down
ENSGALG00010003432	LACC1	2.25007	3.28221e-06	0.128505	0.137903	0.0379457	0.343516	0.902213	0.445524	up
ENSGALG00010021620	TTLL10	2.23255	3.3757e-06	0.0549708	0.115576	0.0829973	0.32122	0.317062	0.29522	up
ENSGALG00010016057	SOHO1	3.43178	4.24896e-06	0.153216	0.094418	0.0746594	0.396736	0.555211	0.746876	up
ENSGALG00010001982	DMD	1.00722	5.58524e-06	0.238427	0.131115	0.168123	0.309375	0.300617	0.35531	up
ENSGALG00010012207	GRIA3	2.38962	5.89828e-06	0.0182071	0.0848955	0	0.215905	0.386984	0.385506	up
ENSGALG00010002606	LOC101750514	-1.14951	6.27498e-06	0.594258	0.365552	0.458019	0.320844	0.205944	0.18862	down
ENSGALG00010016456	LAMP3	1.31536	6.3594e-06	0.361781	0.356665	0.497837	0.867017	1.03524	1.04813	up
ENSGALG00010029193	LOC112530081	-2.58054	6.60133e-06	0.247367	0	0.490038	0	0	0	down
ENSGALG00010019346	POU3F4	1.15429	7.06888e-06	0.785551	0.57013	0.744435	1.34037	1.80422	1.39166	up
ENSGALG00010010505	CD38	-2.31063	8.24284e-06	0.497348	0.588962	0.460493	0.0669048	0.153573	0.0809962	down
ENSGALG00010019661	#N/A	-1.35965	8.28511e-06	1.61081	1.21288	1.28033	0.636918	0.401928	0.503426	down
ENSGALG00010016415	RASGRF1	1.77044	8.31484e-06	0.118695	0.152365	0.0864887	0.339126	0.30569	0.389009	up
ENSGALG00010016842	NPY7R	-1.90504	8.39831e-06	0.288338	0.322974	0.236066	0.0658143	0.123884	0.0792257	down
ENSGALG00010009941	CACNA1E	1.72393	8.9044e-06	0.0702348	0.10993	0.0736245	0.220867	0.22614	0.310491	up
ENSGALG00010020259	#N/A	-1.20995	9.1466e-06	3.02985	1.52168	3.71569	1.15829	0.256664	0.91707	down
ENSGALG00010026027	SLC2A11L1	1.50668	9.35822e-06	0.47974	0.44446	0.43185	1.20061	1.04642	1.23902	up
ENSGALG00010024588	TTC39A	-1.4646	1.06392e-05	0.417299	0.499393	0.448865	0.227441	0.16397	0.16737	down
ENSGALG00010002373	POSTN	1.41798	1.08089e-05	0.133554	0.205663	0.298305	0.496685	0.585787	0.600195	up
ENSGALG00010025849	OBSCN	1.05833	1.13132e-05	0.0537503	0.0516597	0.0574349	0.106888	0.101067	0.0988035	up
ENSGALG00010024658	CSF3	1.54667	1.13675e-05	1.22281	1.1761	1.31528	3.83874	3.11106	3.22074	up
ENSGALG00010004139	PPEF2	-1.52471	1.13682e-05	0.0412869	0	0.0271468	0.014315	0.0138855	0.0766533	down
ENSGALG00010024795	NRROS	-1.11286	1.32907e-05	2.34995	2.06896	1.68836	0.835665	0.732851	1.0727	down
ENSGALG00010029255	RAP1GAP2	1.64468	1.34721e-05	0.143019	0.325595	0.155645	0.527515	0.677457	0.458925	up
ENSGALG00010013586	#N/A	1.97476	1.42213e-05	0.14995	0.322697	0.263713	1.11027	0.770527	0.662693	up
ENSGALG00010020739	PKP3	-1.96538	1.42503e-05	0.756359	0.745491	0.419287	0.183083	0.0971169	0.195005	down
ENSGALG00010011921	MEGF10	2.19737	1.80521e-05	0.021858	0.0572205	0.0905248	0.296962	0.173616	0.234787	up
ENSGALG00010018974	TAS1R1	-1.09825	1.8078e-05	1.01598	1.48781	1.43666	0.900416	0.456156	0.448128	down
ENSGALG00010017782	IGDCC4	1.73556	1.84665e-05	0.204172	0.0704758	0.0755328	0.370747	0.283137	0.305195	up
ENSGALG00010025483	FGF4	3.66815	1.86677e-05	0.034612	0.0182726	0.0355988	0.304931	0.307459	0.151034	up
ENSGALG00010007302	CDH11	1.06075	1.93464e-05	0.399096	0.505633	0.313807	0.839704	0.958939	0.827429	up
ENSGALG00010013541	GJA9	-3.2262	2.03838e-05	0.23582	0.443161	0.55353	0.0254624	0.0253407	0.0710842	down
ENSGALG00010015063	LOC431092	-1.27024	2.19754e-05	5.69209	5.45478	3.82729	1.90664	2.40233	1.34109	down
ENSGALG00010029394	CYGB	2.98041	2.44212e-05	0.0178124	0.0546161	0.0874873	0.479312	0.296995	0.226199	up
ENSGALG00010001209	CDH7	1.44855	2.49402e-05	0.141307	0.0911414	0.169576	0.368042	0.373478	0.362486	up
ENSGALG00010017915	BFSP1	1.02057	2.51163e-05	0.889075	0.610024	0.590277	1.28387	1.09621	1.32719	up
ENSGALG00010006549	ZDHHC23	-1.2099	2.61151e-05	0.57662	0.588147	0.687882	0.310533	0.273271	0.222356	down
ENSGALG00010022911	SMPD3	1.28793	2.6757e-05	0.222957	0.196594	0.164235	0.359965	0.491666	0.438088	up
ENSGALG00010013661	GABRA4	1.23028	2.81701e-05	0.214606	0.223398	0.211855	0.543256	0.577267	0.554879	up
ENSGALG00010025238	IGSF9B	1.57302	2.84596e-05	0.150439	0.123417	0.163655	0.396851	0.575654	0.339599	up
ENSGALG00010027314	PDE4C	-2.01677	2.86874e-05	0.454729	0.626	0.711688	0.0814842	0.165333	0.0605949	down
ENSGALG00010027257	FAM19A3	2.47305	2.96418e-05	0.16671	0.228064	0.109597	0.697898	0.78222	0.527069	up
ENSGALG00010012356	LOC100858177	1.60779	3.12091e-05	1.20213	1.34101	1.72401	2.11672	2.24437	1.37913	up
ENSGALG00010024636	PANX3	-1.02325	3.17736e-05	1.88648	1.9636	2.01724	0.789905	0.998261	1.31576	down
ENSGALG00010019009	NRAP	1.22263	3.23852e-05	0.172653	0.178019	0.128566	0.351102	0.266833	0.353931	up
ENSGALG00010013229	#N/A	1.51217	3.6138e-05	0.254791	0.234198	0.171922	0.618365	0.897981	0.530615	up
ENSGALG00010025644	PI16	1.10249	3.72982e-05	0.285473	0.348394	0.265436	0.533859	0.52232	0.646768	up
ENSGALG00010020642	ANKRD2	-4.76094	3.78103e-05	0.249635	0.0657692	0.0629756	0	0.0565846	0	down
ENSGALG00010009054	RYR2	1.54219	3.98364e-05	0.0200261	0.0360187	0.0476996	0.100135	0.0918332	0.0929524	up
ENSGALG00010024411	#N/A	1.6309	4.25177e-05	0.113182	0.177179	0.15534	0.68278	0.337461	0.34931	up
ENSGALG00010012444	LOC124417767	-2.7333	4.28119e-05	0.208246	0.114165	0.166177	0.0234036	0.0574129	0.0371949	down
ENSGALG00010019583	#N/A	1.65434	4.40779e-05	0.116696	0.253678	0	0.900918	0.589126	0.220944	up
ENSGALG00010000462	#N/A	-1.12445	4.79361e-05	4.26274	1.84546	3.67201	2.0312	1.74576	0.788758	down
ENSGALG00010017913	#N/A	1.47127	5.10283e-05	0.322036	0.47449	0.281279	0.944232	1.02962	0.880586	up
ENSGALG00010004224	NT5E	6.01994	5.17823e-05	0.0119096	0	0	0.0779183	0.111582	0.103466	up
ENSGALG00010007108	MBOAT1	1.03748	5.34683e-05	0.529493	0.574595	0.421942	1.35123	1.0999	0.923882	up
ENSGALG00010006275	#N/A	-1.0212	5.80036e-05	232.14	248.014	241.365	334.986	300.778	314.699	down
ENSGALG00010007892	LOC121109261	-1.85298	5.86828e-05	0.521532	0.637671	0.602227	0.182126	0.0856211	0.118038	down
ENSGALG00010029927	CFAP52	-1.50656	5.86828e-05	0.64564	0.420634	0.691272	0.302812	0.198424	0.0925854	down
ENSGALG00010009132	SHC3	1.37053	5.96548e-05	0.51714	0.134186	0.193653	0.518644	0.389082	0.613563	up
ENSGALG00010001729	MOG	1.75519	6.11234e-05	0.09154	0.162793	0.149853	0.326846	0.739005	0.590648	up
ENSGALG00010012169	HIST2H3A	-1.77728	6.36122e-05	1.05762	0.944086	0.469686	0.227836	0.16247	0.0891555	down
ENSGALG00010006293	SLC22A3	1.00487	6.90587e-05	0.991769	1.42799	1.42347	2.11244	3.42865	2.37028	up
ENSGALG00010024642	RAB3B	4.58131	6.98016e-05	0.0462458	0	0	0.20155	0.307959	0.223452	up
ENSGALG00010018357	#N/A	3.08199	7.11983e-05	0.0162184	0.0193652	0.0247671	0.0746085	0.0683238	0.132055	up
ENSGALG00010006596	#N/A	2.82427	7.83454e-05	0.151906	0.134483	0.0239759	0.282719	0.397412	0.370224	up
ENSGALG00010012230	PTPRQ	1.6301	8.01913e-05	0.0162689	0.0273176	0.029987	0.132387	0.068629	0.0541392	up
ENSGALG00010026560	TNNI1	-2.16395	8.33892e-05	0.404254	0.262907	0.561218	0.343303	0	0.084049	down
ENSGALG00010006552	CPA2	4.21563	8.57419e-05	0.0168163	0	0.0169852	0.149605	0.0657763	0.136614	up
ENSGALG00010014559	#N/A	-2.03416	8.71161e-05	1.04005	0.948409	0.563371	0.136881	0.138448	0.127284	down
ENSGALG00010006410	ADM2	2.76933	9.52712e-05	0.247706	0	0	1.66031	2.43438	0.809058	up
ENSGALG00010007638	#N/A	1.31081	0.000100583	0.166061	0.247042	0.142252	0.37198	0.540882	0.399689	up
ENSGALG00010022845	HYDIN	1.43633	0.000102331	0.0470195	0.0622352	0.0464367	0.110335	0.119335	0.115577	up
ENSGALG00010026177	#N/A	-1.19889	0.00010581	3.16482	2.00689	2.89999	1.33597	0.524383	1.24695	down
ENSGALG00010021683	HFM1	1.61352	0.000107194	0.0208311	0.022243	0.269084	0.224756	0.125379	0.233396	up
ENSGALG00010005232	GATA3	5.20017	0.000109611	0.0300556	0	0	0.134418	0.386302	0.227384	up
ENSGALG00010021367	GRIP2	1.52325	0.000110889	0.138283	0.0740867	0.221432	0.44633	0.39766	0.52937	up
ENSGALG00010013310	MYO16	1.17352	0.00011487	0.174722	0.185736	0.150501	0.280307	0.402116	0.343326	up
ENSGALG00010026047	#N/A	3.87288	0.00011532	0	0	0.0302951	0.22187	0.33876	0.114875	up
ENSGALG00010018894	SERTAD4	1.1598	0.000130076	0.538325	0.391014	0.513309	1.28153	1.33199	0.778431	up
ENSGALG00010020073	LOC112531987	-2.28208	0.000132243	0	0	0	0	0	0	down
ENSGALG00010014632	NWD2	1.24509	0.000135076	0.110823	0.228084	0.182998	0.388757	0.416741	0.419619	up
ENSGALG00010021793	ARHGEF1	1.44994	0.000141387	0.23244	0.100202	0.309837	0.521226	0.604848	0.710899	up
ENSGALG00010028903	ASTN2	1.66517	0.000145701	0.13324	0.0912367	0.142792	0.430923	0.322211	0.35698	up
ENSGALG00010021151	WNT10A	1.95362	0.0001496	0.553891	0.0787429	0.466694	0.970937	1.27566	1.02918	up
ENSGALG00010017212	TINAGL1	1.8936	0.000151809	0.275122	0.137753	0.0328605	0.808867	0.360768	0.572763	up
ENSGALG00010006289	SKIDA1	-4.47156	0.000152939	0.499795	0.184015	0.478287	0	0	0.0718456	down
ENSGALG00010023259	TSPAN15	1.47493	0.000153086	0.462073	0.805777	0.388424	1.50131	1.75851	1.02998	up
ENSGALG00010003223	AREG	-3.02049	0.000155206	0.502037	0.283147	0.431858	0.026776	0.105897	0.0734728	down
ENSGALG00010022182	CNTNAP1	1.96477	0.000163696	0.0675615	0.136234	0.0812749	0.237188	0.35458	0.405553	up
ENSGALG00010012283	LOC101751171	1.0381	0.000163901	1.69354	2.94227	3.98507	4.43522	7.03572	4.91618	up
ENSGALG00010017576	AKAP5	-1.83231	0.000164313	0.481242	0.175564	0.236042	0.0687854	0.050096	0.121767	down
ENSGALG00010006457	NCAPH2	-1.09091	0.000169591	8.07233	7.70924	7.59292	3.90892	3.75556	3.44755	down
ENSGALG00010018760	#N/A	3.26965	0.000182743	0.012022	0.0126039	0.0122894	0.0780978	0.174395	0.126862	up
ENSGALG00010020863	LOC112533232	-1.73688	0.000184746	0	0	0	0	0	0	down
ENSGALG00010008541	#N/A	-1.41549	0.000185364	0.745888	0.940217	0.546649	0.338479	0.294273	0.222727	down
ENSGALG00010024214	CRABP1	-3.56491	0.000188752	0.538197	0.893778	0.441805	0	0.0682626	0.0578325	down
ENSGALG00010029997	#N/A	1.21358	0.000197227	0.680585	0.282748	0.855919	1.24781	1.29807	1.57875	up
ENSGALG00010003740	PITX2	1.53213	0.000198923	0.587765	0.311177	0.75024	1.89148	0.972255	1.1735	up
ENSGALG00010011117	SLC6A15	-1.06404	0.000202279	0.476819	0.682277	0.587133	0.308842	0.24832	0.275206	down
ENSGALG00010000436	LOC121108934	1.19616	0.000216079	0.845684	0.945203	0.997556	1.53361	1.71564	1.22022	up
ENSGALG00010023872	CCL20	1.49657	0.00021703	0.643388	0.786759	0.659662	1.95976	2.82745	2.60148	up
ENSGALG00010022616	GLDN	2.39805	0.000222793	0.02083	0.0661436	0.0857555	0.181734	0.348567	0.342563	up
ENSGALG00010001933	#N/A	-1.41921	0.000222844	0.974728	2.20992	1.93157	0.426655	0.394129	0.852374	down
ENSGALG00010029197	LHX1	2.41592	0.000223794	0.035197	0.184808	0.139491	0.345109	0.457957	0.418134	up
ENSGALG00010028317	#N/A	2.00044	0.000226292	0.0311276	0.0099697	0.0122159	0.0413329	0.073346	0.0434454	up
ENSGALG00010008428	#N/A	-1.22631	0.000232767	0.0598182	0.13297	0.491802	0	0	0.161008	down
ENSGALG00010010523	#N/A	-1.9064	0.000233654	0.462737	0.669864	0.590755	0.185441	0.199225	0.185427	down
ENSGALG00010027156	ISYNA1	1.0605	0.000276902	1.06199	1.21694	1.48233	2.04813	1.9905	2.92626	up
ENSGALG00010014000	STAT4	1.29511	0.000282681	0.25407	0.119339	0.0863184	0.390871	0.26068	0.322013	up
ENSGALG00010006240	#N/A	1.22115	0.000283779	0.413035	0.266632	0.192296	0.732459	0.308457	0.497927	up
ENSGALG00010012702	PTPRO	1.59109	0.000286667	0.0434662	0.0355418	0.120626	0.189604	0.216932	0.185	up
ENSGALG00010014716	#N/A	-1.07301	0.000286667	2.08715	1.87216	1.44875	1.21579	0.57244	0.811446	down
ENSGALG00010018094	#N/A	2.92256	0.000289044	0.0233937	0.0548689	0.0475448	0.412899	0.250053	0.271491	up
ENSGALG00010023736	LOC107050879	1.05183	0.000290508	0.600598	0.93866	0.316313	0.975666	0.873402	1.58627	up
ENSGALG00010006774	#N/A	-2.50774	0.000292964	0.727572	0.401544	0.275874	0.0604766	0.102505	0.0954739	down
ENSGALG00010024523	TOX3	1.44942	0.000298561	0.298569	0.13228	0.22581	0.501954	0.619881	0.657908	up
ENSGALG00010025806	TECTA	-1.43595	0.000304272	0.509738	0.215918	0.278952	0.145394	0.132956	0.104407	down
ENSGALG00010019536	#N/A	-2.13093	0.000306636	0.56595	0.231773	0.52992	0.0278034	0.248057	0.0755573	down
ENSGALG00010012925	SETD4	-1.28104	0.000307917	0.669998	0.71506	0.495466	0.310578	0.183081	0.387928	down
ENSGALG00010003995	MLNR	-1.78911	0.000318776	0.403326	0.384096	0.629473	0.14695	0.0579746	0.173126	down
ENSGALG00010028763	CTSK	1.91015	0.000321414	0.329165	0.596442	0.563103	1.72206	0.441168	1.53738	up
ENSGALG00010021466	HES4	-1.20187	0.000327535	3.16238	3.56416	3.04651	1.07917	1.02116	0.873892	down
ENSGALG00010003533	RNA28S1	-3.02249	0.000331088	0.493321	0.844675	0.13253	0.23012	0.0243157	0.0220153	down
ENSGALG00010010935	LGALS1A	1.73041	0.000331418	0.837436	1.36561	3.08365	5.0548	5.34947	5.7107	up
ENSGALG00010012120	RBM44	-1.63881	0.00033431	0.356628	1.14442	0.818029	0.910781	0.78249	0.312769	down
ENSGALG00010027384	HHATL	2.24446	0.00038611	0.113959	0.039068	0.113197	0.268276	0.412688	0.297485	up
ENSGALG00010027990	#N/A	-1.60988	0.000437233	0	0.251478	0.446096	0.599236	0	0.190649	down
ENSGALG00010024950	NCAM1	1.17452	0.000464796	0.121963	0.269751	0.136477	0.295591	0.358311	0.293838	up
ENSGALG00010027044	#N/A	-1.29465	0.00047023	0.2612	0.265372	0.266325	0.121378	0.0876375	0.10815	down
ENSGALG00010013573	LOC107053928	1.0052	0.000470831	0.627328	0.885462	1.24357	1.65533	1.74657	1.79894	up
ENSGALG00010001914	LOC121106919	-1.09126	0.000485267	0.775829	0.776076	0.820437	0.427171	0.304841	0.442393	down
ENSGALG00010024664	DNAH10	1.61214	0.000499131	0.0408237	0.0200226	0.0376837	0.109317	0.0712244	0.0316533	up
ENSGALG00010009214	PCDH10	1.94609	0.000501651	0.0634768	0.189146	0.153993	0.304989	0.289082	0.55036	up
ENSGALG00010028652	#N/A	-2.3462	0.00050676	0.367823	0.304874	0.203233	0.0547106	0.0726882	0	down
ENSGALG00010010114	#N/A	-2.12989	0.000514118	0.468943	1.18682	0.835979	0.144195	0.325865	0.0672938	down
ENSGALG00010016351	LOC112532465	-1.51651	0.000524688	0	0	0	0	0	0	down
ENSGALG00010010946	SH2D4B	3.40338	0.000530903	0.0524987	0.0139951	0.0135074	0.112543	0.0544823	0.101232	up
ENSGALG00010019409	#N/A	-1.12179	0.000538098	1.39237	1.11913	1.25745	0.7591	0.387297	0.550381	down
ENSGALG00010004386	CFAP44	-1.21287	0.000569142	0.163009	0.173697	0.207012	0.0775943	0.0686509	0.0689892	down
ENSGALG00010023654	#N/A	-1.25494	0.00061744	0.467955	0.359662	0.333258	0.172837	0.147814	0.14413	down
ENSGALG00010024635	#N/A	-1.082	0.00061744	0	0	0	0	0	0	down
ENSGALG00010022652	RLTPR	-1.13535	0.000620788	0.662569	0.541992	0.530391	0.255867	0.193088	0.176228	down
ENSGALG00010001773	NRCAM	4.78136	0.000628445	0	0	0	0.0991985	0.0419446	0	up
ENSGALG00010027123	WDR86	-1.16	0.000631712	0.695724	0.681989	0.416383	0.390111	0.302879	0.106167	down
ENSGALG00010017998	#N/A	1.76593	0.000635576	0	0	0	0.037028	0.296111	0.725864	up
ENSGALG00010009099	CXCR4	1.32796	0.000636097	0.662191	0.932224	0.488521	1.1989	1.7917	1.96065	up
ENSGALG00010024808	CELSR2	1.00602	0.000648749	0.363772	0.704046	0.515861	0.970643	0.676856	0.796291	up
ENSGALG00010023060	ALDH1A2	1.21672	0.000650559	0.299628	0.294694	0.126054	0.7332	0.517548	0.512817	up
ENSGALG00010021505	IHH	1.15476	0.000651159	0.876544	0.978924	1.05484	1.19071	1.77529	1.97162	up
ENSGALG00010004143	TCF24	-1.43043	0.000652267	0.978848	0.855204	0.562527	0.355782	0.172745	0.391012	down
ENSGALG00010010678	KCNIP1	2.66271	0.000656725	0.0225874	0.0745732	0.0107708	0.271483	0.141515	0.142574	up
ENSGALG00010028598	TMOD4	-1.66103	0.000675951	1.48855	1.09464	0.904834	0.13489	0.242349	0.400109	down
ENSGALG00010002325	#N/A	2.00696	0.000711348	0	0	0	0	0.0733194	0	up
ENSGALG00010022356	TCFL5	-1.01589	0.000714431	1.22893	1.05263	0.94924	1.02359	0.251053	0.572824	down
ENSGALG00010017591	ESR2	1.26728	0.000735895	0.321642	0.184062	0.388033	0.678223	0.542644	0.684472	up
ENSGALG00010012641	#N/A	4.73746	0.000768191	0.0576617	0	0.0631517	0.980978	1.0511	0.767887	up
ENSGALG00010021115	ALPL	1.12083	0.000772663	0.447058	0.389359	0.616843	0.981884	0.881703	1.00878	up
ENSGALG00010026240	#N/A	-2.23145	0.000776445	0.488696	0.190887	1.89002	0.155323	0	0.295369	down
ENSGALG00010011311	DOCK8	1.24866	0.000778813	0.0678228	0.0889042	0.13628	0.200829	0.194227	0.240836	up
ENSGALG00010025067	SLC1A2	1.81339	0.000813746	0.0469946	0.0749657	0.0905277	0.226287	0.357264	0.226097	up
ENSGALG00010007930	CBFA2T3	1.56847	0.000829733	0.33314	0.501306	0.153836	0.795465	0.640873	0.541973	up
ENSGALG00010028075	RAB25	-4.12113	0.000840676	0.792808	0.626204	0.301114	0.0650982	0	0	down
ENSGALG00010011601	ANO4	1.20753	0.000843222	0.129742	0.0741831	0.328355	0.415566	0.590409	0.425627	up
ENSGALG00010020345	AGBL1	1.3247	0.000843518	0.084477	0.286711	0.180987	0.388564	0.346378	0.346525	up
ENSGALG00010003157	#N/A	-1.62611	0.000847521	0.350026	0.428103	0.35817	0.090701	0.173607	0.0803093	down
ENSGALG00010006155	TNFRSF19	2.1847	0.000882438	0.0173257	0.0561164	0.113159	0.167416	0.311486	0.119494	up
ENSGALG00010017003	CPZ	1.31649	0.000898873	0.236689	0.183932	0.217739	0.417296	0.437679	0.47469	up
ENSGALG00010005138	LOC422654	2.32776	0.000916137	0.160145	0.0847241	0.240867	0.896857	0.918425	1.25755	up
ENSGALG00010000924	#N/A	-1.78424	0.000916273	1.15904	1.06825	2.19985	0.542156	0.451899	0.65565	down
ENSGALG00010000643	VKORC1	1.45239	0.000924831	3.12306	2.50598	4.81211	8.57551	3.69723	7.57163	up
ENSGALG00010027971	HCN3	1.19066	0.000954916	0.699139	0.73044	0.331529	1.01501	1.15057	0.994301	up
ENSGALG00010020801	LOC124417064	2.38206	0.00100226	0.0559979	0.241137	0.223789	0.423192	0.211025	0.684096	up
ENSGALG00010023596	#N/A	-3.46685	0.00100752	0.188538	0.130671	0.106759	0.0179703	0.0970913	0.0222858	down
ENSGALG00010010524	#N/A	-1.41928	0.00101128	0.927776	1.73454	1.12539	0.336239	0.486613	0.500695	down
ENSGALG00010010825	MAK	-2.65288	0.00105068	0.106682	0.0141223	0.0817391	0	0.0137716	0.0512038	down
ENSGALG00010006601	#N/A	4.69706	0.00108275	0	0	0.106153	0.512483	0.390132	0.2524	up
ENSGALG00010019258	#N/A	1.61419	0.00110592	0.128891	0.0257451	0.14821	0.417986	0.59762	0.298229	up
ENSGALG00010018423	IGFALS	1.14753	0.00115487	0.809019	0.580927	0.455534	1.01717	0.685377	1.19097	up
ENSGALG00010016138	#N/A	-2.97868	0.00117097	0.183115	0.0634407	0.111665	0.0110369	0.027293	0.0558855	down
ENSGALG00010015389	#N/A	-1.42912	0.00119752	0.828647	1.29952	0.95041	0.339038	0.37732	0.262021	down
ENSGALG00010010681	#N/A	-1.09564	0.00120619	0.434575	0.348223	0.300105	0.0360058	0.203791	0.16373	down
ENSGALG00010007968	SLC22A31	1.10669	0.00123782	1.85384	0.474319	1.16777	1.73792	2.26879	1.72112	up
ENSGALG00010002842	#N/A	-2.67329	0.00124031	0.117089	0.256197	0	0	0.342458	0.0999287	down
ENSGALG00010001561	#N/A	1.77994	0.0012991	0.0236468	0.15136	0.0487823	0.205669	0.123366	0.137254	up
ENSGALG00010017132	#N/A	5.27076	0.0013155	0	0	0	0.591646	0.300714	0.332813	up
ENSGALG00010005560	RSPH3	-1.67752	0.00133943	0.602587	0.413135	0.389001	0.205176	0.106716	0.202688	down
ENSGALG00010011085	UGT1A1	1.12752	0.00137587	0.380674	0.244237	0.278413	0.67414	0.765252	0.698854	up
ENSGALG00010011504	#N/A	-1.37025	0.00140452	0.598757	0.489824	0.632567	0.0393426	0.203753	0.0747625	down
ENSGALG00010029415	FOXN1	1.118	0.00144288	0.30354	0.233783	0.544073	0.743018	0.792854	0.587346	up
ENSGALG00010017931	CYP2AB2	1.0856	0.001443	0.390124	0.223356	0.360676	0.656679	1.16141	1.13853	up
ENSGALG00010014201	#N/A	-2.65022	0.00145451	0.384149	0.148433	0.200486	0.117319	0.0740968	0.0174417	down
ENSGALG00010000685	LOC112530906	1.10004	0.00147846	1.05919	0.602505	0.50887	0.929541	1.17306	1.09418	up
ENSGALG00010000896	#N/A	1.24853	0.00152667	0.0712865	0.081074	0.100631	0.201677	0.135068	0.227574	up
ENSGALG00010001557	THRB	2.04635	0.00153882	0.187023	0.127716	0.0401053	0.291092	0.316334	0.520002	up
ENSGALG00010021142	WNT6	1.51108	0.00155448	0.474651	0.41493	0.523905	1.07128	1.20886	1.16657	up
ENSGALG00010023310	#N/A	5.66938	0.00158025	0	0	0	0.125147	0.0816729	0.0520738	up
ENSGALG00010022214	#N/A	1.55003	0.0016238	0.166412	0.154713	0.313485	0.446015	0.66872	0.787027	up
ENSGALG00010018286	#N/A	2.99217	0.00162569	0.245251	0	0	0.24455	1.7378	0.323965	up
ENSGALG00010006183	PARK2	1.55505	0.00167805	0.191307	0.140511	0.506982	0.64231	0.60866	0.792129	up
ENSGALG00010027933	LOC112530287	-1.27091	0.00170995	1.44934	1.20389	0.926157	0.429462	0.527612	0.329047	down
ENSGALG00010014403	#N/A	-1.58513	0.00172204	2.68195	3.12648	0.745975	0.650547	0.339725	1.5913	down
ENSGALG00010022168	#N/A	1.37653	0.00173861	0.107354	0.0744777	0.0889249	0.356672	0.193536	0.161654	up
ENSGALG00010020265	SPTBN5	1.22873	0.00174819	0.0459985	0.0152713	0.0409531	0.0827273	0.0904726	0.0622136	up
ENSGALG00010009057	NXNL2	-1.79492	0.00178082	0.710591	0.332471	0.935793	0.140726	0.191688	0.237252	down
ENSGALG00010016044	#N/A	4.49979	0.00181429	0.0158606	0.0338641	0	0.188627	0.32971	0.145455	up
ENSGALG00010026653	#N/A	-1.81732	0.0018244	1.27287	1.57915	1.04896	0.504665	0.605806	0.347849	down
ENSGALG00010020006	PLB1	1.13856	0.00190002	0.0739611	0.0773437	0.112646	0.201826	0.166883	0.274163	up
ENSGALG00010028613	CIART	-1.22796	0.00191184	3.61171	2.94176	3.16517	1.40155	0.681065	1.37894	down
ENSGALG00010001785	CNTN1	1.26115	0.00193935	0.0765574	0.292281	0.20712	0.300639	0.575097	0.48926	up
ENSGALG00010003542	RNA28S6	-1.83967	0.001995	0.791131	0.644601	0.475034	0.160238	0.23692	0.109495	down
ENSGALG00010003744	#N/A	-1.15717	0.00200251	0.256288	0.33022	0.297782	0.109876	0.240463	0.122416	down
ENSGALG00010024614	ARHGEF5	-2.29327	0.00204293	0.159315	0.155045	0.0886392	0.0544185	0.00587314	0.0108731	down
ENSGALG00010027095	SCN5A	1.34787	0.00206819	0.0393718	0.059651	0.0719772	0.127171	0.142546	0.110927	up
ENSGALG00010024750	APOA4	-1.44624	0.00216361	0.719128	0.365939	0.173567	0.0484829	0.429246	0.147173	down
ENSGALG00010012920	#N/A	5.66809	0.00219291	0	0	0	0.0404668	0.134788	0.187591	up
ENSGALG00010029903	MIR22	-1.41478	0.00219512	0	0	0	0	0	0	down
ENSGALG00010026502	#N/A	2.85066	0.00224574	0.024076	0.0718053	0.0746867	0.182148	0.344865	0.0665532	up
ENSGALG00010027318	#N/A	2.98998	0.00226865	0	0	0	0	0	0	up
ENSGALG00010006606	SULT	4.46917	0.00231681	0	0	0.019809	0.109453	0.0611212	0.0862923	up
ENSGALG00010027225	CREB3L3	-1.54023	0.00233741	0.561634	0.872285	0.597608	0.256542	0.328671	0.082328	down
ENSGALG00010024603	PNPLA1	2.11905	0.0023666	0.0577189	0.0604737	0.0869239	0.223718	0.53427	0.258904	up
ENSGALG00010018264	CFAP61	1.0113	0.00241167	0.142597	0.0611906	0.0243076	0.178237	0.241402	0.147588	up
ENSGALG00010022970	#N/A	1.3942	0.00248519	0.139462	0.137298	0.0712893	0.345086	0.228118	0.128043	up
ENSGALG00010009374	IL12B	2.35893	0.00249167	0.0185552	0.132299	0.0384221	0.335581	0.238118	0.135442	up
ENSGALG00010004006	NKAIN3	1.81652	0.00250265	0.202146	0.199457	0.137463	0.480562	0.442519	0.678495	up
ENSGALG00010028800	AK8	1.4626	0.00256343	0.145548	0.185575	0.0901201	0.238438	0.457328	0.158212	up
ENSGALG00010027748	LOC107055098	5.08238	0.00259333	0	0	0	0	0	0	up
ENSGALG00010011469	CPS1	1.01743	0.0025944	0.202198	0.095897	0.113666	0.25875	0.268937	0.278566	up
ENSGALG00010013419	#N/A	-1.23026	0.00271764	1.92411	0.99344	2.49636	1.70434	0.521482	1.22519	down
ENSGALG00010017386	#N/A	-5.16655	0.0028608	0.1806	0.0641098	0.183259	0	0	0	down
ENSGALG00010029105	#N/A	1.08292	0.00298901	0.153518	0.670635	0.305355	0.931827	0.718255	0.52998	up
ENSGALG00010029866	#N/A	-1.6435	0.00301395	1.05864	0.70083	0.600028	0.155585	0.0772385	0.276766	down
ENSGALG00010011295	FAM167A	-1.64902	0.00302511	0.215368	0.404785	0.63665	0.13799	0.16041	0.151566	down
ENSGALG00010002282	TSKU	1.65126	0.00303129	0.102573	0.125539	0.121999	0.298639	0.278973	0.370978	up
ENSGALG00010000271	RTN4R	3.59934	0.0030852	0.0488432	0.0256639	0.024501	0.121141	0.333891	0.154086	up
ENSGALG00010009273	MAL2	-1.62095	0.00313895	0.416873	0.371055	0.707944	0.203759	0.118594	0.198003	down
ENSGALG00010002138	MYO7A	5.02443	0.00316716	0	0	0.00495729	0.0433856	0.0144027	0.0132795	up
ENSGALG00010002093	#N/A	-5.59635	0.00317173	0.279847	0.822085	0.0933327	0	0	0	down
ENSGALG00010018024	TAS1R3	-1.22411	0.00318226	0.372895	0.387961	0.766715	0.161189	0.232196	0.280523	down
ENSGALG00010005837	LOC107052005	1.10254	0.00321273	0.703606	0.567663	0.679513	0.735105	1.37981	1.09631	up
ENSGALG00010017853	#N/A	-5.4752	0.00324366	0.0976162	0.177013	0.0483753	0	0	0	down
ENSGALG00010014468	AGBL3	2.73884	0.00325252	0.0253417	0	0.0776622	0.161387	0.131213	0.194931	up
ENSGALG00010017154	PIGZ	-1.76241	0.00326074	0.292437	0.405111	0.2644	0.102056	0.0491198	0.135968	down
ENSGALG00010026228	#N/A	4.44114	0.00334424	0	0	0	0	0.530603	0.164856	up
ENSGALG00010002718	#N/A	4.40786	0.00336294	0	0	0.0254603	0.238612	0.128516	0.142705	up
ENSGALG00010022891	NTM	5.0364	0.00337781	0	0.0572097	0	0.544131	0.191335	0.110721	up
ENSGALG00010008415	ADGRF4	-1.76098	0.00338964	0.209642	0.116188	0.395466	0.0379511	0.111851	0.051614	down
ENSGALG00010016552	LRRC66	-1.38149	0.00339235	0.285501	0.159205	0.21459	0.103283	0.0776876	0.0702311	down
ENSGALG00010001450	GPR149	1.16776	0.00342057	0.162561	0.116897	0.207022	0.356673	0.301904	0.298515	up
ENSGALG00010018122	#N/A	-2.40049	0.00345766	0.35022	0.0615652	0.189793	0.0728903	0.0302642	0.00934693	down
ENSGALG00010020650	#N/A	1.17919	0.00361597	0.156474	0.124553	0.165894	0.456567	0.685029	0.313783	up
ENSGALG00010014811	#N/A	1.0428	0.00361861	1.03541	0.582456	0.894078	1.53645	1.68991	1.03032	up
ENSGALG00010026801	FMOD	1.07378	0.00361897	0.426598	0.338256	0.463602	0.796619	0.734567	0.59298	up
ENSGALG00010027400	LOC415939	2.32387	0.00377247	0.0827285	0	0	0.179695	0.127835	0.218438	up
ENSGALG00010011814	CYLY	2.58777	0.00378203	0.0346484	0	0	0.0663705	0	0	up
ENSGALG00010028899	TNFSF8	2.29639	0.00384532	0.0317858	0.0166146	0.0243017	0.0767461	0.0735282	0.143573	up
ENSGALG00010021469	CSPG4	-1.10113	0.0039093	0.351362	0.355933	0.237621	0.109795	0.100909	0.191921	down
ENSGALG00010012034	ARHGEF9	1.44176	0.00391993	0.120987	0.0720511	0.115113	0.439762	0.275384	0.302337	up
ENSGALG00010016535	BNC2	1.28197	0.00394722	0.08314	0.096267	0.188414	0.341199	0.361838	0.200441	up
ENSGALG00010008211	#N/A	5.43597	0.00395272	0	0	0	0.0159751	0.0483183	0.0148356	up
ENSGALG00010015084	FOXO6	1.04374	0.00398409	0.378732	0.366359	0.601527	0.710655	0.799588	0.871053	up
ENSGALG00010029023	#N/A	-3.8963	0.00401233	0.235526	0.192691	0.595202	0	0	0.0528546	down
ENSGALG00010009786	CXorf36	2.19968	0.00413402	0.106464	0.0372591	0	0.227178	0.400861	0.368349	up
ENSGALG00010001621	DLGAP2	1.85254	0.00413628	0.0322207	0.0565787	0.075506	0.0851147	0.148601	0.194678	up
ENSGALG00010018236	#N/A	-5.53153	0.00419233	0.102797	0.127672	0	0	0	0	down
ENSGALG00010027710	KLHL33	-1.84313	0.00424743	0.807313	0.59637	0.558919	0.0881463	0.0307567	0.160443	down
ENSGALG00010007981	TDRD15	-1.48002	0.00432125	0.156969	0.161052	0.0901071	0.0605433	0.0445961	0.0673994	down
ENSGALG00010028992	#N/A	-1.06176	0.00437917	0.756729	0.657109	0.76081	0.376366	0.248786	0.229391	down
ENSGALG00010003965	SNTG1	1.65013	0.00439631	0.0188241	0.0265288	0.0549435	0.0928191	0.172953	0.0721352	up
ENSGALG00010012232	PCSK1	1.61641	0.00442919	0.109727	0.0787441	0.242898	0.2945	0.310316	0.287659	up
ENSGALG00010021641	AGRP	-1.75295	0.00444335	0.873815	0.680879	0.858829	0.15544	0	0	down
ENSGALG00010022490	#N/A	-1.09319	0.00444335	0.781747	1.31714	0.937776	0.387005	0.439303	0.533342	down
ENSGALG00010004836	#N/A	1.53662	0.00448951	0.179099	0.107627	0.0991197	0.782381	0.25243	0.579119	up
ENSGALG00010015278	WNT8A	2.16641	0.00452243	0.0464935	0.0240819	0.0459922	0.105491	0.218617	0.0801464	up
ENSGALG00010021081	KCNH6	5.36848	0.00459576	0	0	0	0.0724366	0.0399025	0.0365607	up
ENSGALG00010018367	PAK5	1.48872	0.00460852	0.0577905	0.110454	0.197306	0.321037	0.226655	0.231874	up
ENSGALG00010019496	#N/A	-1.69933	0.00475496	1.20083	0.651714	1.18495	0.0460346	0.415269	0.384205	down
ENSGALG00010023759	CALCA	1.54395	0.00478648	0.188514	0.159232	0.233097	0.534537	0.561601	0.573547	up
ENSGALG00010007208	LOC101749311	2.76907	0.00482734	0.010805	0.0111101	0	0.135634	0.065168	0.0441407	up
ENSGALG00010003459	#N/A	2.31605	0.00482752	0.0873284	0.0954125	0.0535526	0.0902726	0	0	up
ENSGALG00010002031	#N/A	-1.92919	0.00500527	0	0	0.743943	0	0	0	down
ENSGALG00010029049	#N/A	-2.47216	0.00509317	0.161745	0.0564052	0.109617	0.0142129	0.0553713	0	down
ENSGALG00010028651	#N/A	-1.98952	0.00512989	0.48664	0.769964	0.346118	0.0740107	0.0371385	0.41123	down
ENSGALG00010023647	#N/A	3.45191	0.00514468	0.018981	0	0.0396571	0.0449152	0.0621606	0.115334	up
ENSGALG00010017092	ANKS4B	-1.5747	0.00519882	0.452968	0.774569	0.661705	0.223169	0.264586	0.060958	down
ENSGALG00010020564	#N/A	-1.75622	0.00524407	0.214435	0.170299	0.493284	0.10894	0.100275	0.105674	down
ENSGALG00010013455	PDE6B	4.8414	0.00530298	0	0	0.0102895	0.0422927	0.0517464	0.0574888	up
ENSGALG00010028759	LOC107055100	3.07936	0.00533859	0.0622012	0.0328328	0	0.197919	0.19287	0.237326	up
ENSGALG00010006219	CLEC14A	2.08178	0.00534044	0.15216	0.111299	0.100738	0.157607	0.152453	0.304288	up
ENSGALG00010026626	LOC101751123	3.13574	0.00541739	0	0.0234201	0	0.170639	0.263308	0.153662	up
ENSGALG00010015953	#N/A	-2.18664	0.00542693	0	0	0	0	0	0	down
ENSGALG00010021377	#N/A	2.33249	0.00553734	0	0	0	0	0.528023	0	up
ENSGALG00010021030	CSRP3	1.0341	0.00555985	0.73296	0.858648	0.10088	0.849571	0.840159	1.2899	up
ENSGALG00010028258	#N/A	-5.39918	0.0055881	0	0	0	0	0	0	down
ENSGALG00010027296	LOC107055131	5.29226	0.00567775	0	0	0	0.225688	0.3065	0.218825	up
ENSGALG00010003118	#N/A	1.2688	0.00571912	0.258494	0.0476374	0.311079	0.477282	0.419088	0.415149	up
ENSGALG00010010363	#N/A	-4.86232	0.00581967	0	0.146766	0.0922381	0	0	0	down
ENSGALG00010018525	ST8SIA2	1.43821	0.00586267	0.251379	0.161733	0.202086	0.376025	0.302185	0.672265	up
ENSGALG00010023745	#N/A	1.18225	0.00595674	0.156073	0.0759772	0.0899324	0.202828	0.211964	0.21623	up
ENSGALG00010001808	HOXA4	-1.51711	0.00597228	0.810175	0.929765	0.784286	0.23437	0.34224	0.400523	down
ENSGALG00010021578	ARHGEF7L	1.7587	0.00616722	0.0558375	0.0198053	0.162585	0.0955948	0.204635	0.454751	up
ENSGALG00010025117	#N/A	-1.94146	0.00616722	0.39102	0.27859	0.454175	0.0638249	0.174872	0.0962308	down
ENSGALG00010022594	#N/A	-2.06028	0.00622604	0.580574	0.883743	0.936001	0.239358	0.172116	0	down
ENSGALG00010029494	MYH7	1.23701	0.00624557	0.0723913	0.0588317	0.13553	0.158173	0.135779	0.201146	up
ENSGALG00010024779	LOC427533	-3.66764	0.00637067	0.0530309	0.160206	0.252451	0	0	0	down
ENSGALG00010002527	LRRC3B	1.17532	0.00644784	0.0789337	0.0404729	0.0830427	0.14869	0.187354	0.19149	up
ENSGALG00010010872	FBXO43	1.93575	0.00645857	0.0405833	0.0287943	0.0555613	0.264627	0.0988991	0.117764	up
ENSGALG00010017787	CNRIP1	2.29351	0.00648886	0.0237348	0.126306	0.0488892	0.301542	0.169876	0.224691	up
ENSGALG00010023195	COL24A1	1.30182	0.00656233	0.0682342	0.0613177	0.0668706	0.12015	0.112705	0.133039	up
ENSGALG00010026453	#N/A	-1.12604	0.00656233	0	0	0	0	0	0	down
ENSGALG00010020385	SLC12A8	1.93158	0.00657711	0.0934938	0.120779	0	0.308945	0.221467	0.20448	up
ENSGALG00010010306	#N/A	-1.08603	0.0066207	0.536756	0.874202	1.01034	0.192834	0.407412	0.155625	down
ENSGALG00010004721	LAMA2	1.73708	0.00662578	0.0209495	0.0264095	0.017079	0.039639	0.04681	0.0709761	up
ENSGALG00010018456	#N/A	2.45087	0.00662623	0	0.13637	0	0.45274	0.253696	0.265791	up
ENSGALG00010003570	RNA28S3	-2.47703	0.0066529	0.0548186	0.112634	0.10603	0	0.0729515	0.0220161	down
ENSGALG00010011983	LYZ	-2.35694	0.00672244	0.185528	0	0	0	0	0	down
ENSGALG00010001231	CNDP1	1.76783	0.00690545	0.0953281	0.0836711	0	0.312343	0.393833	0.238161	up
ENSGALG00010013639	#N/A	-1.05226	0.00695914	0.268518	0.199217	0.185363	0.148387	0.219329	0.0689667	down
ENSGALG00010015727	#N/A	-2.12717	0.00697101	0.635642	0.14184	0.519137	0.124926	0	0	down
ENSGALG00010023878	MSMB	-1.05766	0.00701715	3.62093	4.33239	6.91196	2.87587	1.72771	2.14151	down
ENSGALG00010025310	#N/A	-1.9117	0.00712246	0.400274	0.710254	0.372956	0.15346	0.252547	0.334893	down
ENSGALG00010003646	RNA28S17	-1.40237	0.00760338	1.20592	0.929146	0.71565	0.207104	0.559265	0.264177	down
ENSGALG00010021708	CNTNAP5	1.68509	0.00790678	0.0392662	0.127766	0.0304467	0.131797	0.201047	0.175361	up
ENSGALG00010028027	NIT1	1.66342	0.007968	0.327024	0.411766	0.316359	1.01869	0.866345	1.12972	up
ENSGALG00010009135	TENM4	1.20166	0.00811274	0.0699818	0.0727558	0.057644	0.103702	0.14367	0.152444	up
ENSGALG00010018960	RBFOX1	2.03414	0.0081506	0.0613341	0.0323175	0.0549802	0.155449	0.0824446	0.149005	up
ENSGALG00010003335	LOC107057105	1.41344	0.00815694	0.457228	1.50352	0.246579	2.30892	1.5449	1.68763	up
ENSGALG00010022135	CHST1	1.36297	0.00824603	0.276239	0.341643	0.213668	0.835947	0.507497	0.56789	up
ENSGALG00010001745	CADPS2	4.13216	0.00830391	0	0.00981845	0	0.00980189	0.0586003	0.0632476	up
ENSGALG00010026990	#N/A	-1.87752	0.00832041	3.39615	1.05915	1.39279	0.422567	1.43391	0.377732	down
ENSGALG00010013199	RALYL	1.55181	0.00835458	0.165296	0.181139	0.1156	0.243532	0.339741	0.602456	up
ENSGALG00010003255	CALCR	1.06341	0.00844989	0.143539	0.104356	0.225919	0.319745	0.432176	0.305682	up
ENSGALG00010001813	HOXA5	-1.32328	0.00850319	0.625677	0.701935	0.797177	0.382105	0.247483	0.172261	down
ENSGALG00010013072	#N/A	-1.43223	0.00870353	0.514439	0.559978	0.759724	0.284179	0.271909	0.125996	down
ENSGALG00010009627	#N/A	2.67772	0.00878203	0	0.158371	0.0996402	0.388712	0.229819	0.375659	up
ENSGALG00010002097	PCYT1B	1.14054	0.00881651	0.107827	0.199838	0.193983	0.235067	0.469933	0.670284	up
ENSGALG00010011503	NCF2	-3.39926	0.00885773	0.0303228	0.031881	0.0601318	0.0536187	0	0	down
ENSGALG00010002297	#N/A	1.21653	0.00890701	0.600245	0.563047	0.454808	0.972062	0.513049	0.421186	up
ENSGALG00010001309	#N/A	-4.66134	0.00899186	0.178307	0.13465	0.17263	0.0385744	0.0440068	1.75242e-07	down
ENSGALG00010022247	GALNT9	2.56446	0.00905401	0	0	0.0852995	0.0827495	0.274966	0.362664	up
ENSGALG00010009888	#N/A	4.72865	0.00923924	0	0	0.00969797	0.0761689	0.0199103	0.031574	up
ENSGALG00010008485	#N/A	-1.53352	0.00926142	0.576875	0.408171	0.334697	0.30436	0.0935948	0.10901	down
ENSGALG00010007882	CPE	1.00523	0.0094544	0.125214	0.263465	0.35602	0.581805	0.474277	0.56561	up
ENSGALG00010013922	#N/A	-5.13795	0.0095167	0.206285	0.195907	0.760963	0	0	0	down
ENSGALG00010003549	RNA28S4	-3.68523	0.00956185	0	0.22511	0.0806861	0.022985	0	0	down
ENSGALG00010017832	POU3F1	-2.88749	0.00956645	0.777424	0.946184	0.592863	0	0	0.118243	down
ENSGALG00010016929	EPHA8	2.39178	0.00965079	0	0.0445838	0.056797	0.0633951	0.118176	0.108302	up
ENSGALG00010016392	STMN3	1.44701	0.00971835	0.0977544	0.114725	0.124225	0.337763	0.482323	0.133741	up
ENSGALG00010005321	#N/A	1.15453	0.00972345	0.0920708	0.19411	0.164754	0.424523	0.275748	0.305384	up
ENSGALG00010001671	#N/A	-1.99564	0.00978928	0.516322	0.393373	0.165766	0.11199	0.097699	0.1802	down
ENSGALG00010013266	KIAA1755	2.91267	0.00995811	0.0222394	0.0450334	0.0214164	0.0537332	0.136744	0.21366	up
ENSGALG00010013920	#N/A	-2.47079	0.0099945	0.351035	0.252443	0	0.0876778	0.0596924	0	down
ENSGALG00010029001	#N/A	2.58068	0.0100505	0	0.0205348	0	0.121264	0.039361	0.0181723	up
ENSGALG00010025651	#N/A	4.22176	0.0100541	0	0.0229477	0	0.237502	0.0480484	0.235656	up
ENSGALG00010001801	HOXA3	-1.41969	0.0100544	0.348645	0.388858	0.78451	0.19382	0.202922	0.177428	down
ENSGALG00010021825	ONECUT1	-5.28054	0.0100544	0.0204947	0.021163	0.163246	0	0	0	down
ENSGALG00010023067	C15orf62	-1.89239	0.0101395	0.532568	0.360902	0.578334	0.0957689	0	0.293402	down
ENSGALG00010013097	POLR3G	2.24578	0.01014	0.0324422	0.0353426	0.131257	0.174313	0.0901502	0.186234	up
ENSGALG00010007222	#N/A	-1.33482	0.0105378	1.89619	2.16612	1.65934	0.910039	0.593308	0.142507	down
ENSGALG00010014219	LOC112531638	-1.34007	0.0106353	0	0	0	0	0	0	down
ENSGALG00010007698	ADAMTS18	1.81958	0.0106383	0.0265703	0.0467477	0.0211093	0.0760768	0.0915406	0.101954	up
ENSGALG00010018366	44989	4.67457	0.0106749	0	0	0	0.0552715	0.0571728	0.21002	up
ENSGALG00010018662	PADI1	1.78528	0.0109306	0.120794	0.03839	0.0735196	0.276841	0.339061	0.155447	up
ENSGALG00010010580	#N/A	-4.62764	0.01109	0.0292432	0.293356	0	0	0.0307395	0	down
ENSGALG00010011655	SORCS2	1.69331	0.0112199	0.0830637	0.0545499	0.0211885	0.0983404	0.150108	0.136173	up
ENSGALG00010013578	#N/A	-1.77322	0.0112357	0.299129	0.45649	0.420795	0	0	0.190756	down
ENSGALG00010003622	RNA28S16	-4.6725	0.0116974	0.506585	0.559896	0.0753653	8.51e-08	0.0346433	1.01603e-07	down
ENSGALG00010016374	FRMD5	-2.74709	0.011701	0.150177	0.537366	0.25001	0	0	0.271567	down
ENSGALG00010001727	COL9A1	2.3638	0.0118779	0.0671548	0.0142118	0.0133579	0.134344	0.116293	0.0731064	up
ENSGALG00010029565	LPO	1.34519	0.0118815	0.0909208	0.0829307	0.0689806	0.349034	0.124846	0.209472	up
ENSGALG00010007186	#N/A	-2.81144	0.0119185	0.0979762	0.173625	0.115139	0.0372209	0	0.0920792	down
ENSGALG00010022781	#N/A	-1.28048	0.0119911	0.335263	0.537888	0.33049	0.0286935	0.173667	0.16066	down
ENSGALG00010027421	PLPPR3	1.32142	0.0121052	0.437212	0.655482	0.207172	0.547596	0.783858	0.876963	up
ENSGALG00010007900	FHOD3	1.99576	0.0121974	0.046661	0.00882748	0.00838943	0.10769	0.107538	0.0851261	up
ENSGALG00010006636	#N/A	5.23184	0.0122719	0	0	0	0.0349237	0.024913	0.115195	up
ENSGALG00010025301	MORN3	-2.70339	0.012321	0.142618	5.14671e-142	0.245765	2.69716e-197	0.0554128	0.0232197	down
ENSGALG00010027807	#N/A	-3.72779	0.0124144	0.0214834	0.225906	0.0659941	0.0228469	0.0219935	0.0203586	down
ENSGALG00010028667	#N/A	-1.13862	0.0125467	1.11861	0.910194	0.377691	0.462162	0.433423	0.0333352	down
ENSGALG00010013947	#N/A	1.13925	0.0125822	1.99687	1.5122	1.17025	8.17478	2.93076	2.73881	up
ENSGALG00010020690	#N/A	-1.08258	0.0126144	0	1.12187	0	0	0	0	down
ENSGALG00010011718	#N/A	-1.61908	0.0126233	0.205884	0.0548933	0.18069	0.0643392	0.076742	0.0894708	down
ENSGALG00010012098	ART4	-1.14941	0.0127156	0.391355	0.198088	0.280708	0.0746486	0.178141	0.148529	down
ENSGALG00010002428	IBSP	1.83787	0.0127776	0.111091	0.0389832	0.145411	0.408287	0.201348	0.245642	up
ENSGALG00010028208	AMIGO3	-1.06945	0.0129443	3.73019	2.15802	1.9511	1.45347	0.789667	0.786156	down
ENSGALG00010028003	#N/A	-1.34477	0.0132253	0	0	0	0	0	0	down
ENSGALG00010003290	#N/A	-1.83776	0.0132395	0.986359	0.6277	0.59032	0.242498	0.254731	0.398301	down
ENSGALG00010020528	#N/A	-2.99669	0.0134297	2.16878	2.67918	1.12083	0	0	0	down
ENSGALG00010011636	GRIK1	1.71361	0.013578	0.135904	0	0.123225	0.149092	0.196427	0.201574	up
ENSGALG00010025175	#N/A	-2.03427	0.0137363	0.186613	0.271564	0.179594	0.118226	0.0614062	0.0775427	down
ENSGALG00010023876	#N/A	-1.9452	0.013789	0.134322	0.288665	0.138358	0	0	0.0600339	down
ENSGALG00010010744	#N/A	1.56228	0.0141494	0.0268871	0.0830907	0.0381246	0.137906	0.171082	0.141277	up
ENSGALG00010002808	#N/A	2.14343	0.0141608	0	0.0860179	0.118594	0.396361	0	0.330468	up
ENSGALG00010027636	SLC1A6	1.14979	0.0142454	0.214012	0.201454	0.323028	0.298726	0.631343	0.449927	up
ENSGALG00010019653	#N/A	-2.13402	0.014491	0.626134	0.468355	0.643194	0.198668	0.0974269	0.224838	down
ENSGALG00010027944	WDR31	-1.1299	0.0145993	0.284932	0.529188	0.329879	0.252659	0.194242	0.155497	down
ENSGALG00010027381	KLHL40	2.79747	0.0146809	0	0.0356238	0.0171178	0.167348	0.165952	0.06123	up
ENSGALG00010004942	GABRR1	1.33587	0.0146826	0.263434	0.0465096	0.133501	0.264868	0.389896	0.28117	up
ENSGALG00010014807	HES1	-1.60852	0.0147037	1.43144	1.78699	2.21438	0.627739	0.89906	0.304614	down
ENSGALG00010016263	F12	4.55052	0.0148766	0	0	0.0239445	0.0309233	0.0567365	0.0666634	up
ENSGALG00010019168	#N/A	-1.36481	0.0149331	0.836211	0.626314	0.404709	0.199675	0.159801	0.368893	down
ENSGALG00010007966	TMEM74	-1.78	0.0152004	0.138436	0.126563	0.106183	0.0650589	0.0447882	0.0248433	down
ENSGALG00010007268	#N/A	-2.98451	0.0153057	0.31144	0.219405	0.139671	0	0.045363	0.0418479	down
ENSGALG00010017764	IGDCC3	1.03593	0.0154185	0.369746	0.3176	0.182386	0.768569	0.384063	0.387543	up
ENSGALG00010020180	TCF7L1	1.05607	0.0154531	0.513457	0.779523	0.647742	0.681701	1.21261	0.916319	up
ENSGALG00010018175	#N/A	-3.9901	0.0155522	0.0977908	0.0634186	0.0613021	0	0	0	down
ENSGALG00010027385	CNTN2	1.32776	0.015556	0	0	0.036444	0.0667704	0.100146	0.0421634	up
ENSGALG00010005184	FGF14	1.41036	0.0157146	0.227484	0.109267	0.170376	0.385707	0.584357	0.360794	up
ENSGALG00010023231	ASIC1	-2.78715	0.0157957	0.0324559	0.0982689	0.218695	0.0343287	0	0.0268786	down
ENSGALG00010028481	LOC107055327	-1.43431	0.01584	0.573409	0.683389	0.497726	0.0742581	0.245462	0.247309	down
ENSGALG00010021447	OCSTAMP	1.08276	0.0158413	0.276908	0.223535	0.338289	0.528404	0.677608	0.540203	up
ENSGALG00010019733	#N/A	-1.55095	0.015987	0.445747	0.429296	0.439942	0.163267	0.243077	0.103315	down
ENSGALG00010002024	KLHL31	-1.05732	0.0162514	0.253758	0.331277	0.0973386	0.0423029	0.190958	0.026109	down
ENSGALG00010019053	#N/A	-1.01703	0.0162711	0.546666	0.682627	0.348833	0.273827	0.439517	0.163599	down
ENSGALG00010004885	#N/A	-1.14669	0.0166572	3.39199	1.33448	2.88091	0.329539	0.882868	0.458412	down
ENSGALG00010017206	#N/A	-2.90091	0.0166883	0.0252606	0.191823	0.183769	0.0279173	0	0.024734	down
ENSGALG00010029540	TRIM50	-1.04869	0.0167565	0.18878	0.15618	0.0741223	0.0652348	0.137098	0.0629692	down
ENSGALG00010024759	APOC3	-1.8527	0.0167788	1.03779	0.94839	1.06643	0.182452	0.192478	0.70758	down
ENSGALG00010014321	GBE	1.68648	0.0172013	0.152622	0.176318	0.319202	0.72485	0.740018	0.275592	up
ENSGALG00010018329	LOC100857883	1.0474	0.0179572	0.546924	0.751115	0.751713	1.27664	1.51162	0.619039	up
ENSGALG00010005556	IYD	2.38881	0.0179877	0	0.0399742	0.07613	0.31387	0.139281	0.0890806	up
ENSGALG00010001248	PTPRZ1	1.24875	0.0181816	0.0349554	0.0484477	0.104692	0.132935	0.0657919	0.168499	up
ENSGALG00010017924	CYP2AB3	3.39362	0.0181874	0	0.0243451	0.0233726	0.0478959	0.0700663	0.0431954	up
ENSGALG00010027527	MKRN3	-1.11552	0.0182645	1.40376	1.74938	0.827189	0.843726	0.462828	0.450706	down
ENSGALG00010023621	CD79B	2.00002	0.0182755	0.0851458	0.0296277	0	0.0500725	0	0	up
ENSGALG00010017681	ALPI	-3.44012	0.0183333	0.0855101	0	0.289735	0.0428677	0.0450042	0	down
ENSGALG00010015376	#N/A	-1.07421	0.0186664	0.223302	0.256282	0.365568	0.146515	0.224373	0.0642925	down
ENSGALG00010015077	#N/A	1.00962	0.0189363	0.891724	0.250839	0.526105	0.640254	0.553163	0.616708	up
ENSGALG00010013830	#N/A	2.70824	0.019096	0	0	0	0.266525	0.0300084	0.0410221	up
ENSGALG00010020777	PLA2G2A	-2.59763	0.0191748	0.101595	0	0.612343	0	0	0	down
ENSGALG00010002439	GPR82	2.9527	0.019185	0	0	0.0349378	0.155355	0.217714	0.236754	up
ENSGALG00010002434	GPR34	3.23867	0.0193221	0.0180188	0.0188341	0.0187698	0.295704	0.0395805	0.0183318	up
ENSGALG00010026235	#N/A	-2.09006	0.0193318	0.107449	0.124442	0.121837	0.0354238	0.0451532	0.0103985	down
ENSGALG00010014231	IFNKL1	1.57062	0.0193531	0.0500281	0.0905146	0.0700721	0.141106	0.204564	0.207856	up
ENSGALG00010022479	LOC415661	-2.73584	0.019457	0.071026	0.0586295	0.0552403	0	0	0	down
ENSGALG00010003746	HOPX	-1.07424	0.0199962	0.743253	0.501316	1.19144	0.239681	0.412352	0.436695	down
ENSGALG00010023680	MPZL3	-1.95097	0.0200052	0.361693	0.326776	0.371814	0.0281559	0.213498	0.0739591	down
ENSGALG00010011260	#N/A	1.06181	0.0202204	0.0890956	0.0832731	0.162623	0.218496	0.19839	0.212478	up
ENSGALG00010021501	NHEJ1	-1.68321	0.0202851	0.520879	0.26451	0.204159	0.365603	0.0475604	0.0433417	down
ENSGALG00010016058	#N/A	-3.107	0.0205715	0.421209	0.244178	0.222817	0	0	0	down
ENSGALG00010003041	LOC121111178	3.06112	0.0208316	0.0181935	0.019007	0.0187565	0.121314	0.0767809	0.142143	up
ENSGALG00010018583	PPL	1.73779	0.0208364	0.0210776	0.0370065	0.0418232	0.0578322	0.133227	0.078162	up
ENSGALG00010014235	LRRC10	-1.65529	0.020914	1.2416	0.649728	0.285083	0.376511	0.132782	0.1623	down
ENSGALG00010017464	SH3BP2	1.00341	0.0209164	0.182132	0.0838781	0.140427	0.341202	0.203664	0.311321	up
ENSGALG00010008867	#N/A	2.86024	0.0209477	0.00842744	0.00667919	0.00291753	0.0458689	0.0184587	0.0250843	up
ENSGALG00010010247	#N/A	2.67039	0.0209954	0.076734	0.0901157	0.0815227	0.477418	0.0796989	0.0743099	up
ENSGALG00010020063	VSIR	-1.56721	0.0213909	0.239479	0.227563	0.291589	0.0685085	0.105503	0.0970046	down
ENSGALG00010011185	RSPH1	4.45482	0.021555	0	0	0	0.0422619	0.20837	0.0381765	up
ENSGALG00010014065	CHUNK-1	1.46749	0.021651	0.0742046	0.0464311	0.148961	0.161059	0.131591	0.148584	up
ENSGALG00010015410	HTR2B	-1.20598	0.0218551	0.240263	0.376907	0.472089	0.0942776	0.110638	0.137035	down
ENSGALG00010014879	#N/A	-2.97767	0.0219865	0.120327	0.045143	0.202777	0.0290297	0.0514234	0.0465514	down
ENSGALG00010027939	BSPRY	-1.2703	0.022158	0.439272	0.279767	0.935627	0.308479	0.191115	0.116844	down
ENSGALG00010025654	CRTAM	2.09335	0.0221956	0.0930229	0.0163916	0.015754	0.0956854	0.1244	0.231156	up
ENSGALG00010017204	#N/A	-2.21242	0.0223137	0.0335268	0.0709721	0.0343729	0	0.102031	0	down
ENSGALG00010004973	SLN	2.11788	0.022609	0.140614	0	0.438918	1.29584	1.08551	1.51735	up
ENSGALG00010001358	TCERG1L	1.17012	0.0228959	0.123538	0.108634	0.104095	0.290952	0.248652	0.362973	up
ENSGALG00010012554	#N/A	-1.38076	0.0228965	0.0910598	0.096255	0.173467	0.0384347	0.0459926	0.0190314	down
ENSGALG00010021380	#N/A	3.82396	0.0230331	0	0	0	0.0280029	0.021976	0.0507371	up
ENSGALG00010018498	LOC101748744	-1.96668	0.0231733	0.391639	0.405238	0.154735	0.0354321	0.0365347	0.133638	down
ENSGALG00010016105	#N/A	1.90975	0.0232994	0	0.0302837	0	0.0959701	0.119886	0.0837823	up
ENSGALG00010012749	RGS4	1.70892	0.023462	0.0597736	0.159217	0.166371	0.20938	0.208019	0.345554	up
ENSGALG00010009589	#N/A	-1.55457	0.0235384	0.107492	0.0188291	0.0985052	0.0281321	0.0279816	0.0187445	down
ENSGALG00010019630	AJAP1	3.37016	0.0235733	0	0	0.0259528	0.0385193	0.102242	0.0353949	up
ENSGALG00010014944	FGB	1.8736	0.0235994	0.0401244	0.108427	0.0823484	0.269429	0.213526	0.0754261	up
ENSGALG00010027961	TINCR	-1.35297	0.0236706	0.344555	0.187215	0.198003	0.0940288	0.0767251	0.0425745	down
ENSGALG00010006646	#N/A	2.11114	0.0238942	0.0935901	0.0305448	0.0150201	0.0313173	0.113496	0.143897	up
ENSGALG00010006450	#N/A	2.51826	0.0239075	0	0	0	0.170343	0.327407	0.513904	up
ENSGALG00010022740	#N/A	3.75583	0.0241843	0.0214982	0	0	0.114831	0.133076	0.0819288	up
ENSGALG00010010506	#N/A	1.30098	0.0242155	0.176607	0.0568393	0.073724	0.165226	0.230565	0.30512	up
ENSGALG00010019825	#N/A	2.10974	0.0242484	0.0166527	0.0703109	0.017226	0.0379936	0.106335	0.131757	up
ENSGALG00010014650	#N/A	2.57124	0.0242489	0.220306	0	0	0.363003	0	0	up
ENSGALG00010028441	#N/A	1.7921	0.0243209	0.0996381	0.0502016	0.23537	0.279716	0.302533	0.156718	up
ENSGALG00010024748	TRPM1	1.4467	0.0244527	0.0252677	0.0401927	0.0453787	0.0415459	0.072547	0.0917685	up
ENSGALG00010015872	TMC1	1.83482	0.0244964	0.0094463	0.0101191	0.0513171	0.0621654	0.0994177	0.101547	up
ENSGALG00010006572	POU4F2	-1.91654	0.0245376	0.51358	0.375719	0.451837	0.126219	0.0439145	0.200024	down
ENSGALG00010005141	CCDC170	1.04551	0.0245946	0.150115	0.189549	0.173028	0.30603	0.380332	0.195046	up
ENSGALG00010002116	#N/A	-1.50413	0.0248353	0.0969737	0.0615849	0.129428	0.0322052	0.0101965	0.0379302	down
ENSGALG00010007022	#N/A	1.05357	0.0248353	0.0961508	0.0515348	0.0612411	0.165996	0.161944	0.108443	up
ENSGALG00010020229	#N/A	1.78953	0.0248812	0.0211211	0.00737504	0.0570865	0.108076	0.106821	0.0658577	up
ENSGALG00010016806	LOC112530518	1.65909	0.0248984	0.110289	0.130049	0.0630231	0.257874	0.316037	0.255657	up
ENSGALG00010020849	#N/A	1.62806	0.0251794	3.36238	0.319923	3.8839	14.2309	0.141473	7.34933	up
ENSGALG00010006971	#N/A	-4.37215	0.0258345	0.0793927	0	0	0	0	0	down
ENSGALG00010010940	NRG3	1.58528	0.0258692	0.106369	0.224373	0.0647593	0.0878382	0.34233	0.435685	up
ENSGALG00010027144	MYO5B	-2.15782	0.026247	0.0572817	0.0587088	0.125429	0	0.025741	0.02359	down
ENSGALG00010017881	KCNK10	1.97306	0.0263255	0.0287606	0.0770142	0.0147648	0.139979	0.0900616	0.0278268	up
ENSGALG00010020472	LOC112532596	-1.19993	0.0264693	0	0	0	0	0	0	down
ENSGALG00010011273	RUNX1T1	2.49976	0.0265056	0.0218809	0.025058	0	0.0576139	0.0589709	0.0871459	up
ENSGALG00010000933	#N/A	2.80995	0.0266966	0	0	0	0	0.0675073	0	up
ENSGALG00010017177	#N/A	-2.79662	0.0268305	0.141591	0.106947	0.0506478	0	0	0	down
ENSGALG00010023598	IL10RA	1.01591	0.0268305	0.19528	0.388736	0.370801	0.888611	0.371607	0.778445	up
ENSGALG00010010544	#N/A	3.09615	0.0268386	0	0.0457228	0.0436516	0.0396876	0.0412746	0.114213	up
ENSGALG00010016241	LOC121106513	1.08189	0.0276611	0.0748024	0.0400861	0.0974016	0.552986	0.209292	0.234919	up
ENSGALG00010013520	CREG2	-1.06763	0.0276799	0.801016	1.25807	1.31342	0.303708	0.667173	0.668542	down
ENSGALG00010002405	KCNQ5	3.78421	0.0278271	0.0122369	0	0	0.0658272	0.0252691	0.0585426	up
ENSGALG00010003566	RNA28S2	-2.10588	0.0279242	0.109618	0.16882	0.053007	0.0460187	0.0729371	0.0220125	down
ENSGALG00010029758	DNAH9	1.10331	0.0280071	0.0263295	0.0381955	0.0276762	0.0468467	0.0569297	0.0568608	up
ENSGALG00010024975	#N/A	-4.51403	0.0280578	0.48811	0.134873	0	0	0	0	down
ENSGALG00010024446	GRM4	1.63789	0.0281935	0.0572476	0.195255	0.0929496	0.199552	0.39769	0.158139	up
ENSGALG00010001331	#N/A	-1.10695	0.0283205	0.62465	1.22527	1.78514	0.279219	0.560225	0.910416	down
ENSGALG00010021507	#N/A	-1.22304	0.0284256	1.13148	0.522273	1.5134	0.312055	0.629695	0.241826	down
ENSGALG00010010327	FBP1	1.16476	0.0285335	0.162159	0.464889	0.554952	0.825782	0.918522	0.847076	up
ENSGALG00010012160	SYT4	-2.71798	0.0288942	0.0588895	0.0391319	0.0385182	0.026863	0.00814618	0.00756995	down
ENSGALG00010015519	LOC101747532	2.13188	0.0289111	0.0364216	0.08095	0.00516524	0.0975541	0.098443	0.0713306	up
ENSGALG00010028620	#N/A	-1.7005	0.0289944	0.0998158	0.0848372	0.111469	0.0303171	0.0222617	0.0549138	down
ENSGALG00010000468	TESC	1.35428	0.0289967	0.655549	0.71646	0.771184	1.31314	1.84718	1.05686	up
ENSGALG00010013364	OTOGL	1.9268	0.0290717	0	0.0170038	0.0251299	0.0278196	0.0473984	0.0400685	up
ENSGALG00010007888	MIOX	-1.76566	0.0295765	0.263635	0.577955	0.145977	0.21039	0.210073	0	down
ENSGALG00010022409	CARNS1	4.29804	0.0299572	0	0	0.0480455	0.038196	0.170932	0.231782	up
ENSGALG00010005555	PRSS12	1.17728	0.0300765	0.0614548	0.0461202	0.0538305	0.188748	0.162679	0.13409	up
ENSGALG00010022278	#N/A	-1.736	0.0300968	0.112653	0.152022	0.182983	0.0560867	0.0711603	0.0685639	down
ENSGALG00010028268	#N/A	-1.05945	0.0301607	0.459011	0.3272	0.421247	0.198417	0.260377	0.111222	down
ENSGALG00010028416	S100A4	3.30366	0.0301886	0	0.447897	0.585548	0	2.72345	0	up
ENSGALG00010023545	PTPRT	2.8912	0.0302405	0.0113953	0	0.0227555	0.116385	0.0218549	0.0302309	up
ENSGALG00010013172	TNFSF13B	1.18616	0.0302666	0.0656989	0.117309	0.12519	0.176489	0.236747	0.253295	up
ENSGALG00010021762	LAMB2	1.27511	0.0306209	6.90751	4.03243	6.53983	10.1017	10.3132	11.1851	up
ENSGALG00010029106	#N/A	1.53555	0.0306298	0.1676	0.0751025	0.0519243	0.0774887	0.249466	0.275975	up
ENSGALG00010022863	FAM81A	1.58838	0.0308954	0.0327989	0.0572055	0.0895371	0.192131	0.115003	0.128064	up
ENSGALG00010006026	FAM172BP	1.06405	0.0309413	0.36297	0.297945	0.0946004	0.875436	0.595067	0.522458	up
ENSGALG00010027842	SLAMF8	-1.20259	0.0312233	0.456879	0.758304	0.269323	0.0439606	0.183899	0.153764	down
ENSGALG00010008983	GEMIN7	-1.3547	0.03131	0.116437	0.266122	1.94119e-10	0.147867	0.0751314	0.391246	down
ENSGALG00010020292	NPM2	-1.27681	0.0313846	2.15892	2.64191	2.84667	1.23895	1.52318	0.276583	down
ENSGALG00010018028	#N/A	-2.45439	0.0314284	0.0859736	0.150497	0.17191	0.0267344	0	0.076139	down
ENSGALG00010010220	LHX9	-1.76258	0.0314492	0.103133	0.164306	0.0936513	0.0395488	0.0311844	0.100117	down
ENSGALG00010019454	#N/A	-1.73597	0.0315797	0.143288	0.290926	0.0747831	0.0339173	0.0785574	0.102648	down
ENSGALG00010004560	#N/A	-2.54998	0.0317763	0.0561158	0.0525059	0.176348	0.0152275	6.4538e-06	0.0198183	down
ENSGALG00010002962	LOC121109386	-1.54546	0.0321413	0.296749	0.277494	0.29277	0.0830468	0.171532	0.0814951	down
ENSGALG00010021472	#N/A	-4.18085	0.0322417	0	0	0	0	0	0	down
ENSGALG00010011181	#N/A	3.24046	0.0326187	0.0543969	0	0.0511264	0.167008	0.0918546	0.207352	up
ENSGALG00010015216	#N/A	1.4014	0.0329738	0.0651803	0.107244	0.0302319	0.106199	0.192355	0.201615	up
ENSGALG00010014875	MIRLET7I	-1.80004	0.0331725	0	0	0	0	0	0	down
ENSGALG00010003005	#N/A	4.467	0.0332913	0	0	0	0	0	0.0254517	up
ENSGALG00010005505	FABP2	3.16023	0.0332913	0.0551038	0.0629991	0	0.307875	0.0584942	0.165071	up
ENSGALG00010002946	GDPD5	1.06866	0.03349	0.17047	0.188902	0.119165	0.410389	0.30882	0.213544	up
ENSGALG00010015330	#N/A	-1.4502	0.0336463	0.357576	0.181776	0.105475	0.163737	0.0175584	0.0324246	down
ENSGALG00010006780	#N/A	-2.53682	0.0337118	0.110983	0.153672	0.118819	0.0489135	0.0214554	0.0239446	down
ENSGALG00010014820	LOC112532947	-1.43577	0.033722	0	0	0	0	0	0	down
ENSGALG00010016551	#N/A	1.27175	0.0338405	0.0314835	0.0409837	0.116742	0.139476	0.113098	0.114302	up
ENSGALG00010025378	PAX3	-2.07297	0.033954	0.166126	0.0472202	0.121858	0.015345	0.0302296	0.0279441	down
ENSGALG00010013757	DGKI	1.53355	0.0341197	0.0447238	0.0165019	0.0754924	0.110448	0.10996	0.128665	up
ENSGALG00010002819	BMP3	1.23906	0.0345517	0.086652	0.0795174	0.0998117	0.178727	0.16982	0.209509	up
ENSGALG00010027015	#N/A	-1.09682	0.0345856	0.369777	0.591975	0.650058	0.172691	0.418749	0.280196	down
ENSGALG00010011010	#N/A	-1.23714	0.0345968	0.228657	0.227359	0.230552	0.060353	0.190785	0.0706903	down
ENSGALG00010015901	LOC100858332	-4.19296	0.0352421	0.181587	0.177831	0.342327	0	0.157266	0	down
ENSGALG00010021295	#N/A	-2.96681	0.0353972	0.299513	0.0710886	0.171743	0	0.0348511	0.0323806	down
ENSGALG00010000193	#N/A	1.22218	0.0354571	0.608809	0.511391	0.9024	1.62707	1.24375	1.02631	up
ENSGALG00010002244	#N/A	-1.18666	0.0355648	0.415254	0.37023	0.656516	0.162651	0.110873	0.246617	down
ENSGALG00010002557	#N/A	1.47035	0.0360405	0	0	0	0.029588	0	0	up
ENSGALG00010006808	#N/A	-2.0167	0.0360524	0.228353	0.309573	0.108955	0.0870226	0.0169289	0.117437	down
ENSGALG00010020442	#N/A	-1.21809	0.0362182	0.297133	0.252885	0.296651	0.186042	0.136928	0.0829149	down
ENSGALG00010000403	LOC112531175	-3.00712	0.0364311	0	0	0	0	0	0	down
ENSGALG00010015656	#N/A	-1.52751	0.036674	0.0364139	0.0779341	0.0749536	0.0396633	0	0	down
ENSGALG00010007772	CLEC3A	1.63852	0.0367773	0	0.143991	0.14057	0.437097	0.231725	0.188088	up
ENSGALG00010018884	#N/A	1.50539	0.0368352	0.160176	0.0915392	0.308689	0.250778	0.319623	0.156331	up
ENSGALG00010018215	CFAP70	-1.03789	0.0368524	0.218242	0.195614	0.129348	0.109525	0.0916283	0.153318	down
ENSGALG00010017011	#N/A	-2.76212	0.037205	0.102946	0.0941186	0.0453503	0	0.0153415	0.0427496	down
ENSGALG00010001492	#N/A	1.57544	0.0372353	5.28335	3.71641	7.7413	10.7968	4.24782	12.819	up
ENSGALG00010013321	PDCL2	-1.31163	0.0372628	0.431739	0.646613	0.685035	0	0.146838	0.412941	down
ENSGALG00010012752	#N/A	-2.26951	0.0375046	0.0291634	0.0515731	0.0608997	0.0116431	0.0213136	0.00990375	down
ENSGALG00010023656	#N/A	2.50082	0.0377141	0.118127	9.18865e-10	0.000482116	0.0629505	0.156843	0.0235821	up
ENSGALG00010025801	PTPN7	-2.3567	0.0377206	0.102235	0.176499	0.236923	0.036665	0.0989929	0.0354309	down
ENSGALG00010013919	#N/A	1.97934	0.0381161	0	0.0908622	0	0.293645	0.0634929	0.210554	up
ENSGALG00010014431	#N/A	-1.20487	0.0382987	0.420182	0.605038	0.381403	0.298899	0.149627	0.137378	down
ENSGALG00010021067	SLC4A10	2.13165	0.0383634	0.0373884	0	0.0136609	0.0575237	0.0352273	0.0490537	up
ENSGALG00010029539	FKBP6	-1.51868	0.0383797	0.329915	0.305023	0.28534	0.0452696	0.0920334	0.336875	down
ENSGALG00010013423	ZNF804A	3.26526	0.0385405	0.0209275	0.0110325	0	0.0304672	0.0301033	0.088068	up
ENSGALG00010024481	LOC112532944	-1.06775	0.0387461	0	0	0	0	0	0	down
ENSGALG00010002758	GREB1	1.23179	0.0388277	0.0290927	0.0228062	0.0591138	0.0921164	0.130394	0.117262	up
ENSGALG00010018630	#N/A	1.91877	0.0389406	0	0	0	0	0	0	up
ENSGALG00010008150	TERT	1.02624	0.0391441	0.105175	0.0885802	0.0430006	0.163336	0.217975	0.191276	up
ENSGALG00010026032	#N/A	1.62224	0.039407	0.0400816	0	0	0.33449	0.203688	0.189557	up
ENSGALG00010029885	#N/A	2.28025	0.0394527	0.0680725	0	0.0293247	0.084185	0.132664	0.0558526	up
ENSGALG00010024355	LOC124418141	-3.63459	0.0394943	0.0386461	0.0286453	0.0386457	5.48663e-08	0.00911853	0.0152055	down
ENSGALG00010005602	ZC2HC1B	2.158	0.0396242	0.0918478	0	0	0.267792	0.0902884	0.0836854	up
ENSGALG00010006610	#N/A	-1.82457	0.0396622	0.187667	0.115931	0.123218	0.0354591	0.0801732	0	down
ENSGALG00010005573	CHST9	2.39224	0.0396738	0.0542934	0	0.00281193	0.0250562	0.136413	0.10676	up
ENSGALG00010014178	LRTM2	2.62472	0.0396913	0.0188689	0.0428424	0.0189685	0.0977421	0.11908	0.0547766	up
ENSGALG00010026646	LOC112532850	-2.94618	0.0398605	0	0	0	0	0	0	down
ENSGALG00010004241	PREX2	1.10233	0.0398649	0.0845249	0.0205057	0.0998406	0.0923257	0.135769	0.138481	up
ENSGALG00010004936	#N/A	-2.73054	0.0403596	0.0417079	0.13449	0.0431858	0.0265762	0.0069843	0	down
ENSGALG00010029420	LAT2	2.82978	0.0405008	0.0500275	0	0.0493079	0.0428931	0.124348	0.170775	up
ENSGALG00010019930	#N/A	1.7388	0.0406203	0	0	0	0	0	0	up
ENSGALG00010026614	#N/A	-1.67596	0.0406493	0.231656	0.198003	0.237003	0.0783444	0.119871	0.0833977	down
ENSGALG00010017490	SCNN1B	1.26699	0.040663	0.148439	0.0760623	0.121454	0.265645	0.228041	0.272191	up
ENSGALG00010021313	KPNA7	1.08166	0.041031	0.38364	0.134797	0.0642864	0.512902	0.274832	0.730627	up
ENSGALG00010029019	#N/A	3.26361	0.0413432	0	0.0454769	0	0.128539	0.0417918	0.231781	up
ENSGALG00010028990	#N/A	-4.11961	0.0413689	0.000279814	0.415334	1.21665	0.265641	0.102862	0.212983	down
ENSGALG00010004078	#N/A	2.52938	0.0415993	0	0	0	0.0430629	0	0	up
ENSGALG00010016639	#N/A	1.6184	0.0417931	0.0371455	0.0525769	0.0129181	0.163054	0.149717	0.114278	up
ENSGALG00010020789	#N/A	-1.94998	0.0419975	0	0	2.08713	0	0	0	down
ENSGALG00010020420	#N/A	-4.09875	0.0424432	0.199643	0.0541897	0	0	0	0	down
ENSGALG00010026916	#N/A	-1.14219	0.0426554	0	18.0644	0	7.88904	0	0	down
ENSGALG00010010248	THL	2.07117	0.0426665	0.0201639	0.0641385	0	0.153917	0.0626412	0.0775677	up
ENSGALG00010026166	WNT9A	1.50593	0.0432998	0.0471676	0.111447	0.0483086	0.141765	0.146669	0.214929	up
ENSGALG00010005720	COL25A1	3.69553	0.0433673	0	0	0	0.0178794	0.159327	0.0163867	up
ENSGALG00010020337	#N/A	2.48403	0.043444	0	0.0672672	0.0323444	0.12945	0.0633913	0.0877928	up
ENSGALG00010018361	ASIC4	-4.11088	0.0438736	0.114176	0.116058	0.0220614	0.0188996	0	0	down
ENSGALG00010015505	CHGA	1.26337	0.0439125	0.0950599	0.204308	0.28688	0.287917	0.344058	0.464531	up
ENSGALG00010030013	#N/A	-1.33531	0.0439125	0.600326	0.452933	0.517343	0.0826803	0.0417562	0.231346	down
ENSGALG00010004132	ST18	1.89089	0.043923	0.0137112	0.0145175	0.0141043	0.0307784	0.0688494	0.0475504	up
ENSGALG00010004573	#N/A	-1.56312	0.0441722	0.368289	0.165858	0.310305	0.0597724	0.10303	0.0936069	down
ENSGALG00010013130	#N/A	2.79672	0.0441722	0.00993651	0.00517947	0	0.144801	0.0427954	0.0404048	up
ENSGALG00010009992	#N/A	-1.06017	0.0441921	0.206421	0.551605	0.285461	0.225188	0.126507	0.206747	down
ENSGALG00010023337	FLI1	2.84646	0.0444118	0	0.0143899	0.0280433	0.0296246	0.0986583	0.0521549	up
ENSGALG00010017620	UBAP1L	1.81444	0.0451337	0.184372	0.139651	0.219213	0.101422	0.363805	0.363619	up
ENSGALG00010010474	#N/A	2.76852	0.0451723	0	0	0.0189646	0.0411691	0.0345321	0.162533	up
ENSGALG00010027632	LAMC3	-2.54597	0.0451787	0.0527965	0.0817429	0.0770334	0.0112062	0	0.0219392	down
ENSGALG00010016291	#N/A	-3.49962	0.0453581	0.133332	0.143221	0.0593706	0.0653147	0.0197641	0.0182835	down
ENSGALG00010013640	SNPH	-1.06954	0.0458325	0.541625	0.332455	0.341098	0.113062	0.23176	0.294453	down
ENSGALG00010007886	GRM5	1.58606	0.0458694	0.0299613	0.0524874	0.0203528	0.073874	0.0609201	0.122019	up
ENSGALG00010011255	#N/A	1.67296	0.0459458	0.010867	0.0341065	0.0111243	0.0365633	0.0756777	0	up
ENSGALG00010011154	SLC26A7	1.48626	0.0462854	0.0483232	0.0196035	0.0503493	0.208639	0.110506	0.15214	up
ENSGALG00010009506	HAS2	1.11905	0.0464007	0.105676	0.06687	0.0982245	0.205602	0.16887	0.303385	up
ENSGALG00010027829	#N/A	-2.02981	0.0464649	0.0754375	0.570831	0.290829	0.0381997	0.0126123	0.0564915	down
ENSGALG00010003633	RNA28S19	-2.31682	0.0471077	69.1545	72.2723	49.5504	16.7211	30.3624	12.2	down
ENSGALG00010008295	ATP5SL	-1.46387	0.0473411	25.9849	31.5517	25.5784	19.5155	16.1528	19.6822	down
ENSGALG00010007901	FSTL5	2.17016	0.0478041	0.0511376	0.0269542	0	0.080407	0.0371376	0.103506	up
ENSGALG00010002513	LINC00954	1.53763	0.0478346	0	0	0	0	0	0	up
ENSGALG00010011038	GSG1	1.8536	0.0478876	0.101785	0.143254	0.0343019	0.128862	0.326611	0.120283	up
ENSGALG00010002229	#N/A	2.84437	0.0479036	0.0710503	0	0.0633604	0.124782	0.122536	0.037907	up
ENSGALG00010016373	SRL	-1.02566	0.0482965	0.332792	0.293343	0.387276	0.11432	0.163012	0.1496	down
ENSGALG00010025570	#N/A	2.70646	0.0483175	0.00563046	0	1.46761e-09	0	0.00720292	0.0160124	up
ENSGALG00010025276	LOC112533226	-1.40224	0.0483882	0	0	0	0	0	0	down
ENSGALG00010014642	#N/A	-1.09384	0.0486945	0.233632	0.132997	0.137631	0.0550547	0.122295	0.0812506	down
ENSGALG00010025011	#N/A	1.1903	0.0491112	0.266799	0.0716668	0.136611	0.423458	0.0693107	0.192645	up
ENSGALG00010002605	EOMES	2.13245	0.0492178	0	0.0414743	0.0601475	0.11879	0.19585	0.143659	up
ENSGALG00010011317	BLK	2.47443	0.0492178	0	0.033999	0	0.121301	0.0613014	0	up
ENSGALG00010025934	#N/A	4.27184	0.0496506	0.00141757	0	0	0	0.00147864	0.146528	up
ENSGALG00010010930	FAM163A	1.18223	0.0496736	0.232986	0.185874	0.203708	0.253741	0.526877	0.416447	up
ENSGALG00010003453	#N/A	1.0986	0.0499436	0	0	0	0	0	0	up
