# Supplementary material for: Regulation of Follicular Development in Chickens: WIF1 Modulates Granulosa Cell Proliferation and Progesterone Synthesis via Wnt/β-Catenin Signaling Pathway
Source: Int J Mol Sci. 2024 Feb 1;25(3):1788. doi: 10.3390/ijms25031788 (PMC10855829; doi:10.3390/ijms25031788)
Supplement: Supplementary file 1 [file ijms-25-01788-s001.zip › Table S4.xlsx]

## Sheet: go_result
Table S4. GO result of DEGs.
ONTOLOGY	ID	Description	GeneRatio	BgRatio	pvalue	p.adjust	qvalue	geneID	Count
BP	GO:0007155	cell adhesion	24/88	144/2030	2.0261e-09	2.18008e-06	1.59529e-06	396536/396213/373887/396276/395337/396035/419222/374148/419824/415797/374007/419106/395686/428253/396202/395801/417786/395450/424231/396071/419825/373926/771113/373980	24
BP	GO:0030182	neuron differentiation	23/88	161/2030	1.03699e-07	2.81702e-05	2.06137e-05	373887/396104/395337/396035/396382/395214/374148/396073/419824/408251/396236/419106/396381/396202/395844/395801/417786/396543/419263/419825/396397/419070/395829	23
BP	GO:0030154	cell differentiation	40/88	428/2030	1.36945e-07	2.81702e-05	2.06137e-05	419184/396536/396213/554219/373887/396104/395337/396035/396382/395214/374148/396073/419824/408251/423196/396236/396216/428857/374007/396056/419106/395862/396381/396202/395844/395801/415846/396431/417786/419088/396543/100858404/419263/419825/395241/771113/396397/419070/395829/395594	40
BP	GO:0098609	cell-cell adhesion	15/88	71/2030	1.38509e-07	2.81702e-05	2.06137e-05	396536/395337/396035/419222/374148/419824/415797/374007/419106/428253/396202/395801/417786/419825/373926	15
BP	GO:0022008	neurogenesis	24/88	177/2030	1.43511e-07	2.81702e-05	2.06137e-05	396213/373887/396104/395337/396035/396382/395214/374148/396073/419824/408251/396236/419106/396381/396202/395844/395801/417786/396543/419263/419825/396397/419070/395829	24
BP	GO:0048869	cellular developmental process	40/88	430/2030	1.57083e-07	2.81702e-05	2.06137e-05	419184/396536/396213/554219/373887/396104/395337/396035/396382/395214/374148/396073/419824/408251/423196/396236/396216/428857/374007/396056/419106/395862/396381/396202/395844/395801/415846/396431/417786/419088/396543/100858404/419263/419825/395241/771113/396397/419070/395829/395594	40
BP	GO:0043009	chordate embryonic development	11/88	37/2030	1.8403e-07	2.82881e-05	2.06999e-05	374148/396073/418125/374007/419106/396381/395801/395307/100858404/395231/395829	11
BP	GO:0007275	multicellular organism development	42/88	472/2030	2.2961e-07	3.08826e-05	2.25985e-05	396473/396536/396213/373887/396104/395337/395245/396035/396382/395214/419222/374148/396073/419824/408251/418125/420617/396236/396216/415797/374007/396056/419106/395862/396381/396202/395844/395801/417786/419088/396543/395307/100858404/419263/395231/419825/395241/771113/396397/419070/395829/395594	42
BP	GO:0048699	generation of neurons	23/88	169/2030	2.62685e-07	3.14055e-05	2.29811e-05	373887/396104/395337/396035/396382/395214/374148/396073/419824/408251/396236/419106/396381/396202/395844/395801/417786/396543/419263/419825/396397/419070/395829	23
BP	GO:0009653	anatomical structure morphogenesis	32/88	305/2030	3.46419e-07	3.72747e-05	2.72759e-05	419184/396536/373887/396104/395337/395245/396035/396382/419222/374148/396073/419824/418125/428857/415797/374007/419106/395862/396381/396202/395844/395801/417786/419088/396543/395307/100858404/395231/419825/396397/395829/395594	32
BP	GO:0007399	nervous system development	28/88	245/2030	4.22899e-07	4.13672e-05	3.02707e-05	396473/396213/373887/396104/395337/396035/396382/395214/374148/396073/419824/408251/418125/420617/396236/374007/419106/396381/396202/395844/395801/417786/396543/419263/419825/396397/419070/395829	28
BP	GO:0060562	epithelial tube morphogenesis	9/88	27/2030	8.86464e-07	7.94862e-05	5.81645e-05	374148/396073/374007/419106/395862/396381/395844/395801/100858404	9
BP	GO:0048598	embryonic morphogenesis	15/88	82/2030	1.02446e-06	8.01153e-05	5.86248e-05	396536/395245/374148/396073/374007/419106/395862/396381/395844/395801/419088/396543/395307/100858404/395231	15
BP	GO:0048731	system development	37/88	405/2030	1.04239e-06	8.01153e-05	5.86248e-05	396473/396536/396213/373887/396104/395337/396035/396382/395214/374148/396073/419824/408251/418125/420617/396236/374007/396056/419106/395862/396381/396202/395844/395801/417786/419088/396543/395307/100858404/419263/395231/419825/395241/396397/419070/395829/395594	37
BP	GO:0009792	embryo development ending in birth or egg hatching	11/88	46/2030	2.08092e-06	0.000149271	0.00010923	374148/396073/418125/374007/419106/396381/395801/395307/100858404/395231/395829	11
BP	GO:0048513	animal organ development	30/88	301/2030	3.00476e-06	0.00020207	0.000147866	419184/396536/373887/395337/396035/374148/396073/418125/396236/428857/374007/396056/419106/395862/396381/396202/395844/395801/396317/417786/419088/395307/100858404/395231/396071/419825/395241/396397/395829/395594	30
BP	GO:0009887	animal organ morphogenesis	17/88	116/2030	4.65155e-06	0.000294416	0.00021544	395337/396035/374148/396073/428857/374007/419106/395862/396381/395844/395801/419088/395307/100858404/395231/395829/395594	17
BP	GO:0009790	embryo development	17/88	121/2030	8.43726e-06	0.000504361	0.000369068	396536/395245/374148/396073/418125/374007/419106/395862/396381/395844/395801/419088/396543/395307/100858404/395231/395829	17
BP	GO:0002009	morphogenesis of an epithelium	10/88	45/2030	1.28358e-05	0.000726914	0.000531923	419184/374148/396073/374007/419106/395862/396381/395844/395801/100858404	10
BP	GO:0048562	embryonic organ morphogenesis	10/88	46/2030	1.58233e-05	0.000851295	0.000622939	374148/396073/419106/395862/396381/395844/395801/395307/100858404/395231	10
BP	GO:0048468	cell development	25/88	252/2030	3.00582e-05	0.00154012	0.00112699	396213/554219/373887/395337/396035/396382/395214/374148/396073/419824/408251/396236/396216/396056/419106/396381/396202/395801/417786/419088/100858404/419263/419825/771113/396397	25
BP	GO:0048706	embryonic skeletal system development	6/88	16/2030	3.16067e-05	0.00154585	0.00113119	396381/395801/395307/100858404/395231/395829	6
BP	GO:0048666	neuron development	16/88	122/2030	3.96445e-05	0.00185467	0.00135717	373887/395337/396035/396382/395214/419824/408251/396236/419106/396381/396202/395801/417786/419263/419825/396397	16
BP	GO:0060429	epithelium development	14/88	97/2030	4.34929e-05	0.00194993	0.00142687	419184/396536/396035/374148/396073/418125/374007/396056/419106/395862/396381/395844/395801/100858404	14
BP	GO:0009888	tissue development	21/88	195/2030	4.56054e-05	0.00196285	0.00143633	419184/396536/395337/396035/374148/396073/418125/396236/374007/396056/419106/395862/396381/395844/395801/396317/419088/100858404/396071/395829/395594	21
BP	GO:0048729	tissue morphogenesis	11/88	64/2030	6.08374e-05	0.00251773	0.00184236	419184/396035/374148/396073/374007/419106/395862/396381/395844/395801/100858404	11
BP	GO:0045597	positive regulation of cell differentiation	12/88	77/2030	7.52323e-05	0.00276382	0.00202244	395337/374148/396073/396216/419106/395862/396381/395801/100858404/395241/771113/419070	12
BP	GO:0030198	extracellular matrix organization	8/88	35/2030	8.16121e-05	0.00276382	0.00202244	396243/395337/374148/415797/395801/771873/396071/395594	8
BP	GO:0043062	extracellular structure organization	8/88	35/2030	8.16121e-05	0.00276382	0.00202244	396243/395337/374148/415797/395801/771873/396071/395594	8
BP	GO:0045229	external encapsulating structure organization	8/88	35/2030	8.16121e-05	0.00276382	0.00202244	396243/395337/374148/415797/395801/771873/396071/395594	8
BP	GO:0048705	skeletal system morphogenesis	8/88	35/2030	8.16121e-05	0.00276382	0.00202244	374148/374007/396381/395801/419088/395307/100858404/395231	8
BP	GO:0003002	regionalization	10/88	55/2030	8.21954e-05	0.00276382	0.00202244	396073/418125/395862/396381/395844/395801/419088/395307/100858404/395231	10
BP	GO:0051239	regulation of multicellular organismal process	21/88	207/2030	0.000112656	0.00367328	0.00268794	396536/396213/395971/395337/374148/396073/100858343/418125/396236/396216/419106/395862/396381/395801/396317/396543/414871/100858404/395241/771113/395829	21
BP	GO:0035295	tube development	13/88	93/2030	0.000118576	0.00375258	0.00274597	396536/373887/374148/396073/418125/374007/419106/395862/396381/395844/395801/100858404/395594	13
BP	GO:0035270	endocrine system development	5/88	13/2030	0.000133645	0.00410864	0.00300652	396536/374148/396073/419106/100858404	5
BP	GO:0045595	regulation of cell differentiation	16/88	136/2030	0.000153183	0.00457846	0.00335031	419184/396536/396213/395337/374148/396073/396216/419106/395862/396381/395801/100858404/395241/771113/419070/395829	16
BP	GO:0098742	cell-cell adhesion via plasma-membrane adhesion molecules	7/88	29/2030	0.000162307	0.00460001	0.00336608	396536/419222/419824/415797/374007/428253/396202	7
BP	GO:2000026	regulation of multicellular organismal development	14/88	109/2030	0.000162454	0.00460001	0.00336608	396536/396213/395337/374148/396073/396216/419106/395862/396381/395801/100858404/395241/771113/395829	14
BP	GO:0007156	homophilic cell adhesion via plasma membrane adhesion molecules	6/88	21/2030	0.000179619	0.00495565	0.00362632	419222/419824/415797/374007/428253/396202	6
BP	GO:0031175	neuron projection development	14/88	111/2030	0.00019831	0.00527049	0.00385671	373887/395337/396035/396382/395214/419824/408251/419106/396381/396202/417786/419263/419825/396397	14
BP	GO:0032526	response to retinoic acid	5/88	14/2030	0.000200827	0.00527049	0.00385671	396382/374148/395862/396381/771113	5
BP	GO:0010628	positive regulation of gene expression	12/88	86/2030	0.000226644	0.0058064	0.00424887	395971/395337/374148/396073/408251/100858343/420617/428857/419106/395844/395801/100858404	12
BP	GO:0007389	pattern specification process	10/88	62/2030	0.000235003	0.00584001	0.00427346	396073/418125/395862/396381/395844/395801/419088/395307/100858404/395231	10
BP	GO:0007417	central nervous system development	11/88	74/2030	0.000238811	0.00584001	0.00427346	396473/373887/396035/374148/418125/396381/396202/395844/417786/419825/396397	11
BP	GO:0000902	cell morphogenesis	14/88	114/2030	0.000264894	0.00619621	0.00453411	373887/396035/396382/419222/419824/415797/374007/419106/396381/396202/395801/417786/419825/396397	14
BP	GO:0051094	positive regulation of developmental process	14/88	114/2030	0.000264894	0.00619621	0.00453411	373887/395337/374148/396073/396216/419106/395862/396381/395801/100858404/395241/771113/419070/395829	14
BP	GO:0030855	epithelial cell differentiation	9/88	52/2030	0.000283941	0.00623511	0.00456257	396536/396035/374148/396073/396056/419106/396381/395801/100858404	9
BP	GO:0045596	negative regulation of cell differentiation	9/88	52/2030	0.000283941	0.00623511	0.00456257	419184/396536/374148/396073/419106/395801/100858404/395241/395829	9
BP	GO:0060322	head development	9/88	52/2030	0.000283941	0.00623511	0.00456257	373887/396035/374148/418125/396381/396202/395801/417786/419825	9
BP	GO:0035239	tube morphogenesis	11/88	76/2030	0.000304531	0.0065535	0.00479556	373887/374148/396073/374007/419106/395862/396381/395844/395801/100858404/395594	11
BP	GO:0003007	heart morphogenesis	7/88	32/2030	0.000314656	0.00659487	0.00482583	374148/396073/419106/395862/395844/395801/395594	7
BP	GO:0060070	canonical Wnt signaling pathway	8/88	42/2030	0.000318711	0.00659487	0.00482583	396023/373887/396104/374148/396073/419106/396543/395829	8
BP	GO:0048568	embryonic organ development	10/88	65/2030	0.000351308	0.00713221	0.00521903	374148/396073/419106/395862/396381/395844/395801/395307/100858404/395231	10
BP	GO:0035050	embryonic heart tube development	4/88	10/2030	0.000567251	0.0107675	0.00787919	396073/395862/395844/395801	4
BP	GO:0048469	cell maturation	4/88	10/2030	0.000567251	0.0107675	0.00787919	419106/396202/395801/100858404	4
BP	GO:2000027	regulation of animal organ morphogenesis	4/88	10/2030	0.000567251	0.0107675	0.00787919	374148/419106/396381/395801	4
BP	GO:0051093	negative regulation of developmental process	10/88	69/2030	0.00057801	0.0107675	0.00787919	419184/396536/395214/374148/396073/419106/395801/100858404/395241/395829	10
BP	GO:0033993	response to lipid	9/88	57/2030	0.000580406	0.0107675	0.00787919	423504/396197/395337/396382/374148/395862/396381/395575/771113	9
BP	GO:0048871	multicellular organismal-level homeostasis	8/88	46/2030	0.000610816	0.0111396	0.00815148	395337/374148/419106/395801/396317/419088/100858404/395594	8
BP	GO:0045165	cell fate commitment	8/88	47/2030	0.000710305	0.0127381	0.00932119	395337/396382/374148/396073/419106/395801/396543/395829	8
BP	GO:0002682	regulation of immune system process	11/88	84/2030	0.000740862	0.0130683	0.00956281	396536/554219/395971/395337/374148/396216/419106/395801/100858404/771113/417489	11
BP	GO:0007507	heart development	9/88	59/2030	0.000754607	0.0130961	0.00958313	374148/396073/418125/419106/395862/395844/395801/395241/395594	9
BP	GO:0022407	regulation of cell-cell adhesion	6/88	27/2030	0.000793717	0.0135562	0.00991981	396536/395337/374148/374007/419106/395801	6
BP	GO:0009967	positive regulation of signal transduction	14/88	127/2030	0.00082365	0.0138476	0.0101331	396536/554219/373887/395971/395551/396104/395337/417319/374148/408251/419106/395818/395801/396543	14
BP	GO:0022408	negative regulation of cell-cell adhesion	4/88	11/2030	0.000862014	0.0142697	0.0104419	396536/374148/374007/395801	4
BP	GO:0001501	skeletal system development	10/88	73/2030	0.000914841	0.0149147	0.0109139	374148/418125/374007/396381/395801/419088/395307/100858404/395231/395829	10
BP	GO:0048732	gland development	6/88	28/2030	0.00097539	0.0155324	0.0113659	396536/395337/374148/396073/419106/100858404	6
BP	GO:0007162	negative regulation of cell adhesion	5/88	19/2030	0.000981603	0.0155324	0.0113659	396536/373887/374148/374007/395801	5
BP	GO:0007267	cell-cell signaling	16/88	160/2030	0.00101108	0.0157669	0.0115375	396023/373887/395971/396104/395337/374148/396073/408251/396236/419106/396381/395801/395266/396543/100858404/395829	16
BP	GO:0016055	Wnt signaling pathway	9/88	62/2030	0.00109412	0.0165814	0.0121335	396023/373887/396104/374148/396073/419106/395266/396543/395829	9
BP	GO:0198738	cell-cell signaling by wnt	9/88	62/2030	0.00109412	0.0165814	0.0121335	396023/373887/396104/374148/396073/419106/395266/396543/395829	9
BP	GO:0009799	specification of symmetry	4/88	12/2030	0.00125045	0.0174077	0.0127382	396073/395862/395844/395801	4
BP	GO:0009855	determination of bilateral symmetry	4/88	12/2030	0.00125045	0.0174077	0.0127382	396073/395862/395844/395801	4
BP	GO:0016339	calcium-dependent cell-cell adhesion via plasma membrane cell adhesion molecules	4/88	12/2030	0.00125045	0.0174077	0.0127382	419222/415797/374007/396202	4
BP	GO:0030856	regulation of epithelial cell differentiation	4/88	12/2030	0.00125045	0.0174077	0.0127382	396536/374148/419106/396381	4
BP	GO:0048704	embryonic skeletal system morphogenesis	4/88	12/2030	0.00125045	0.0174077	0.0127382	396381/395307/100858404/395231	4
BP	GO:0072175	epithelial tube formation	4/88	12/2030	0.00125045	0.0174077	0.0127382	374148/374007/419106/396381	4
BP	GO:0061564	axon development	10/88	76/2030	0.0012619	0.0174077	0.0127382	396035/396382/395214/419824/419106/396381/396202/417786/419825/396397	10
BP	GO:0044093	positive regulation of molecular function	13/88	118/2030	0.00129584	0.0176496	0.0129152	419184/396536/373887/395971/395551/395337/417319/408251/427841/419106/395818/395801/771113	13
BP	GO:0001503	ossification	7/88	40/2030	0.00131253	0.0176536	0.0129181	395337/395245/374148/418125/395801/396317/396071	7
BP	GO:0050673	epithelial cell proliferation	6/88	30/2030	0.00143329	0.0188076	0.0137626	396536/395337/374148/396073/419106/100858404	6
BP	GO:0060173	limb development	6/88	30/2030	0.00143329	0.0188076	0.0137626	374148/418125/374007/395862/395801/396543	6
BP	GO:0032989	cellular component morphogenesis	12/88	105/2030	0.00146146	0.0189461	0.0138639	373887/396035/396382/396073/419824/419106/396381/396202/395801/417786/419825/396397	12
BP	GO:0120036	plasma membrane bounded cell projection organization	14/88	135/2030	0.00152141	0.0194886	0.0142609	373887/395337/396035/396382/395214/419824/408251/419106/396381/396202/417786/419263/419825/396397	14
BP	GO:1903706	regulation of hemopoiesis	5/88	21/2030	0.00160353	0.0202104	0.0147891	396216/419106/395801/100858404/771113	5
BP	GO:0030155	regulation of cell adhesion	8/88	53/2030	0.00161635	0.0202104	0.0147891	396536/373887/395337/374148/374007/419106/395801/771113	8
BP	GO:0040011	locomotion	13/88	121/2030	0.00164097	0.0202104	0.0147891	396536/373887/395551/374148/419824/418125/428857/419106/396381/396202/417786/419825/396397	13
BP	GO:0009952	anterior/posterior pattern specification	6/88	31/2030	0.00171615	0.0202104	0.0147891	418125/396381/419088/395307/100858404/395231	6
BP	GO:0048736	appendage development	6/88	31/2030	0.00171615	0.0202104	0.0147891	374148/418125/374007/395862/395801/396543	6
BP	GO:0001763	morphogenesis of a branching structure	4/88	13/2030	0.00174681	0.0202104	0.0147891	374148/396381/395801/100858404	4
BP	GO:0035148	tube formation	4/88	13/2030	0.00174681	0.0202104	0.0147891	374148/374007/419106/396381	4
BP	GO:0048754	branching morphogenesis of an epithelial tube	4/88	13/2030	0.00174681	0.0202104	0.0147891	374148/396381/395801/100858404	4
BP	GO:0061138	morphogenesis of a branching epithelium	4/88	13/2030	0.00174681	0.0202104	0.0147891	374148/396381/395801/100858404	4
BP	GO:0060485	mesenchyme development	8/88	54/2030	0.00183102	0.0209593	0.0153371	395337/396035/374148/396073/418125/419106/100858404/395594	8
BP	GO:0000904	cell morphogenesis involved in differentiation	10/88	80/2030	0.00188545	0.0213552	0.0156267	396035/396382/419824/419106/396381/396202/395801/417786/419825/396397	10
BP	GO:0002263	cell activation involved in immune response	5/88	22/2030	0.00200503	0.0217343	0.0159042	554219/395971/395337/419106/417489	5
BP	GO:0002366	leukocyte activation involved in immune response	5/88	22/2030	0.00200503	0.0217343	0.0159042	554219/395971/395337/419106/417489	5
BP	GO:0030030	cell projection organization	14/88	139/2030	0.00202477	0.0217343	0.0159042	373887/395337/396035/396382/395214/419824/408251/419106/396381/396202/417786/419263/419825/396397	14
BP	GO:0002252	immune effector process	6/88	32/2030	0.00203958	0.0217343	0.0159042	396536/554219/395971/395337/419106/417489	6
BP	GO:0051216	cartilage development	7/88	43/2030	0.00204012	0.0217343	0.0159042	374148/418125/374007/395801/419088/100858404/395829	7
BP	GO:0071345	cellular response to cytokine stimulus	7/88	43/2030	0.00204012	0.0217343	0.0159042	396536/554219/373887/395551/395337/374148/419106	7
BP	GO:0050793	regulation of developmental process	18/88	205/2030	0.00221212	0.0233357	0.017076	419184/396536/396213/373887/395337/395214/374148/396073/396216/419106/395862/396381/395801/100858404/395241/771113/419070/395829	18
BP	GO:0048812	neuron projection morphogenesis	10/88	82/2030	0.00227999	0.0238182	0.0174291	373887/396035/396382/419824/419106/396381/396202/417786/419825/396397	10
BP	GO:0010647	positive regulation of cell communication	14/88	142/2030	0.0024876	0.0256282	0.0187536	396536/554219/373887/395971/395551/396104/395337/417319/374148/408251/419106/395818/395801/396543	14
BP	GO:0120039	plasma membrane bounded cell projection morphogenesis	10/88	83/2030	0.0025009	0.0256282	0.0187536	373887/396035/396382/419824/419106/396381/396202/417786/419825/396397	10
BP	GO:0023056	positive regulation of signaling	14/88	143/2030	0.00266015	0.0269185	0.0196977	396536/554219/373887/395971/395551/396104/395337/417319/374148/408251/419106/395818/395801/396543	14
BP	GO:0007420	brain development	7/88	45/2030	0.00267684	0.0269185	0.0196977	373887/396035/418125/396381/396202/417786/419825	7
BP	GO:0048858	cell projection morphogenesis	10/88	84/2030	0.00273874	0.027286	0.0199666	373887/396035/396382/419824/419106/396381/396202/417786/419825/396397	10
BP	GO:0007409	axonogenesis	9/88	71/2030	0.0029101	0.0287272	0.0210213	396035/396382/419824/419106/396381/396202/417786/419825/396397	9
BP	GO:0002376	immune system process	15/88	161/2030	0.00304127	0.0291873	0.0213579	396536/554219/395971/395551/395337/374148/396073/100858343/396216/419106/395818/395801/100858404/771113/417489	15
BP	GO:0043010	camera-type eye development	7/88	46/2030	0.00304766	0.0291873	0.0213579	373887/374148/396056/419106/396381/395801/395829	7
BP	GO:0061448	connective tissue development	7/88	46/2030	0.00304766	0.0291873	0.0213579	374148/418125/374007/395801/419088/100858404/395829	7
BP	GO:0002064	epithelial cell development	4/88	15/2030	0.00311946	0.0291873	0.0213579	374148/396056/395801/100858404	4
BP	GO:0035265	organ growth	4/88	15/2030	0.00311946	0.0291873	0.0213579	374148/396073/395801/419088	4
BP	GO:0043547	positive regulation of GTPase activity	4/88	15/2030	0.00311946	0.0291873	0.0213579	419184/395551/408251/427841	4
BP	GO:0032990	cell part morphogenesis	10/88	86/2030	0.00326896	0.0303225	0.0221886	373887/396035/396382/419824/419106/396381/396202/417786/419825/396397	10
BP	GO:0007186	G protein-coupled receptor signaling pathway	9/88	73/2030	0.00353152	0.0324779	0.0237658	396536/373887/395971/395551/417319/408251/395382/396256/378901	9
BP	GO:0016477	cell migration	12/88	117/2030	0.00372638	0.0339796	0.0248647	419184/396536/373887/395551/396035/374148/418125/428857/374007/419106/396381/100858404	12
BP	GO:0009605	response to external stimulus	18/88	215/2030	0.00378336	0.0342092	0.0250327	396536/554219/395971/395551/396197/395337/395214/374148/419824/100858343/419106/396381/396202/417786/396218/419825/395241/396397	18
BP	GO:1902533	positive regulation of intracellular signal transduction	9/88	74/2030	0.0038792	0.0347835	0.025453	396536/373887/395971/395551/395337/417319/374148/408251/419106	9
BP	GO:0030282	bone mineralization	4/88	16/2030	0.00402297	0.0357745	0.0261782	374148/418125/396317/396071	4
BP	GO:0008283	cell population proliferation	15/88	166/2030	0.00410467	0.0362019	0.0264909	419184/396536/554219/395337/414143/374148/396073/418125/396216/428857/419106/395862/396381/395801/100858404	15
BP	GO:0007411	axon guidance	7/88	49/2030	0.00439943	0.0381757	0.0279353	419824/419106/396381/396202/417786/419825/396397	7
BP	GO:0097485	neuron projection guidance	7/88	49/2030	0.00439943	0.0381757	0.0279353	419824/419106/396381/396202/417786/419825/396397	7
BP	GO:0030097	hemopoiesis	8/88	62/2030	0.00447512	0.0385218	0.0281885	554219/395337/396073/396216/419106/395801/100858404/771113	8
BP	GO:0006935	chemotaxis	9/88	76/2030	0.00465511	0.039132	0.028635	396536/395551/419824/419106/396381/396202/417786/419825/396397	9
BP	GO:0042330	taxis	9/88	76/2030	0.00465511	0.039132	0.028635	396536/395551/419824/419106/396381/396202/417786/419825/396397	9
BP	GO:0048667	cell morphogenesis involved in neuron differentiation	9/88	76/2030	0.00465511	0.039132	0.028635	396035/396382/419824/419106/396381/396202/417786/419825/396397	9
BP	GO:0043085	positive regulation of catalytic activity	10/88	91/2030	0.00495857	0.0413599	0.0302653	419184/396536/373887/395971/395551/417319/408251/427841/395818/395801	10
BP	GO:0071695	anatomical structure maturation	4/88	17/2030	0.0050886	0.042118	0.03082	419106/396202/395801/100858404	4
BP	GO:0019221	cytokine-mediated signaling pathway	5/88	27/2030	0.00517795	0.0425304	0.0311218	396536/554219/373887/395551/395337	5
BP	GO:0051253	negative regulation of RNA metabolic process	12/88	123/2030	0.00563458	0.0459304	0.0336098	396104/395337/395245/374148/396073/420617/419106/396381/415846/396431/395241/396397	12
BP	GO:0051345	positive regulation of hydrolase activity	6/88	39/2030	0.00575122	0.0465287	0.0340476	419184/395551/408251/427841/395818/395801	6
BP	GO:0048870	cell motility	12/88	124/2030	0.00601762	0.0481949	0.0352669	419184/396536/373887/395551/396035/374148/418125/428857/374007/419106/396381/100858404	12
BP	GO:0048584	positive regulation of response to stimulus	15/88	173/2030	0.00609144	0.0481949	0.0352669	396536/554219/373887/395971/395551/396104/395337/417319/374148/408251/419106/395818/395801/396543/417489	15
BP	GO:0060828	regulation of canonical Wnt signaling pathway	5/88	28/2030	0.00609155	0.0481949	0.0352669	396023/396104/374148/396073/396543	5
BP	GO:0044057	regulation of system process	6/88	40/2030	0.00653452	0.0513222	0.0375553	396536/395971/396073/396236/414871/395241	6
BP	GO:0072359	circulatory system development	11/88	110/2030	0.00667586	0.0519086	0.0379844	373887/374148/396073/418125/419106/395862/395844/395801/100858404/395241/395594	11
BP	GO:0010562	positive regulation of phosphorus metabolic process	10/88	95/2030	0.00675391	0.0519086	0.0379844	419184/554219/373887/395971/395337/417319/374148/408251/428857/395801	10
BP	GO:0045937	positive regulation of phosphate metabolic process	10/88	95/2030	0.00675391	0.0519086	0.0379844	419184/554219/373887/395971/395337/417319/374148/408251/428857/395801	10
BP	GO:0042127	regulation of cell population proliferation	13/88	142/2030	0.00683133	0.0519492	0.0380141	419184/395337/414143/374148/396073/418125/396216/428857/419106/395862/396381/395801/100858404	13
BP	GO:0034097	response to cytokine	7/88	53/2030	0.00685575	0.0519492	0.0380141	396536/554219/373887/395551/395337/374148/419106	7
BP	GO:0030323	respiratory tube development	3/88	10/2030	0.00757223	0.0534859	0.0391386	396536/374148/100858404	3
BP	GO:0030324	lung development	3/88	10/2030	0.00757223	0.0534859	0.0391386	396536/374148/100858404	3
BP	GO:0045667	regulation of osteoblast differentiation	3/88	10/2030	0.00757223	0.0534859	0.0391386	395337/374148/395801	3
BP	GO:0048565	digestive tract development	3/88	10/2030	0.00757223	0.0534859	0.0391386	374148/395801/100858404	3
BP	GO:0055123	digestive system development	3/88	10/2030	0.00757223	0.0534859	0.0391386	374148/395801/100858404	3
BP	GO:0060351	cartilage development involved in endochondral bone morphogenesis	3/88	10/2030	0.00757223	0.0534859	0.0391386	374148/395801/419088	3
BP	GO:1902107	positive regulation of leukocyte differentiation	3/88	10/2030	0.00757223	0.0534859	0.0391386	419106/395801/771113	3
BP	GO:1903708	positive regulation of hemopoiesis	3/88	10/2030	0.00757223	0.0534859	0.0391386	419106/395801/771113	3
BP	GO:0001654	eye development	7/88	54/2030	0.00760412	0.0534859	0.0391386	373887/374148/396056/419106/396381/395801/395829	7
BP	GO:0150063	visual system development	7/88	54/2030	0.00760412	0.0534859	0.0391386	373887/374148/396056/419106/396381/395801/395829	7
BP	GO:1905114	cell surface receptor signaling pathway involved in cell-cell signaling	9/88	82/2030	0.00772705	0.0534859	0.0391386	396023/373887/396104/374148/396073/419106/395266/396543/395829	9
BP	GO:0007043	cell-cell junction assembly	4/88	19/2030	0.00775446	0.0534859	0.0391386	419222/415797/374007/395241	4
BP	GO:0010631	epithelial cell migration	4/88	19/2030	0.00775446	0.0534859	0.0391386	396536/374148/418125/419106	4
BP	GO:0048593	camera-type eye morphogenesis	4/88	19/2030	0.00775446	0.0534859	0.0391386	374148/396381/395801/395829	4
BP	GO:0010033	response to organic substance	15/88	179/2030	0.00836169	0.0569232	0.0416539	423504/396536/554219/373887/395551/396197/395337/396382/374148/419106/395862/396381/395575/396431/771113	15
BP	GO:0031401	positive regulation of protein modification process	9/88	83/2030	0.00836266	0.0569232	0.0416539	419184/554219/373887/395337/417319/374148/408251/428857/419106	9
BP	GO:0048880	sensory system development	7/88	55/2030	0.00841152	0.0569232	0.0416539	373887/374148/396056/419106/396381/395801/395829	7
BP	GO:0034330	cell junction organization	8/88	69/2030	0.00862925	0.0580317	0.042465	396035/419222/419824/415797/374007/428253/419825/395241	8
BP	GO:0001817	regulation of cytokine production	6/88	43/2030	0.00935004	0.0603285	0.0441457	396536/395971/395337/100858343/419106/396543	6
BP	GO:0002062	chondrocyte differentiation	4/88	20/2030	0.00937694	0.0603285	0.0441457	374148/395801/419088/395829	4
BP	GO:0021700	developmental maturation	4/88	20/2030	0.00937694	0.0603285	0.0441457	419106/396202/395801/100858404	4
BP	GO:0050727	regulation of inflammatory response	4/88	20/2030	0.00937694	0.0603285	0.0441457	396536/395971/395337/419106	4
BP	GO:0090132	epithelium migration	4/88	20/2030	0.00937694	0.0603285	0.0441457	396536/374148/418125/419106	4
BP	GO:0001775	cell activation	8/88	70/2030	0.00940286	0.0603285	0.0441457	554219/395971/395337/100858343/419106/395801/373926/417489	8
BP	GO:0001934	positive regulation of protein phosphorylation	8/88	70/2030	0.00940286	0.0603285	0.0441457	419184/554219/373887/395337/417319/374148/408251/428857	8
BP	GO:0009893	positive regulation of metabolic process	24/88	346/2030	0.00941932	0.0603285	0.0441457	419184/396536/554219/373887/395971/396104/395337/417319/396382/374148/396073/408251/100858343/420617/428857/419106/395862/396381/395818/395844/395801/396317/396431/100858404	24
BP	GO:0021517	ventral spinal cord development	3/88	11/2030	0.0100886	0.060644	0.0443766	396381/395844/396397	3
BP	GO:0044331	cell-cell adhesion mediated by cadherin	3/88	11/2030	0.0100886	0.060644	0.0443766	419222/415797/374007	3
BP	GO:0048663	neuron fate commitment	3/88	11/2030	0.0100886	0.060644	0.0443766	396382/374148/395801	3
BP	GO:0060675	ureteric bud morphogenesis	3/88	11/2030	0.0100886	0.060644	0.0443766	374148/419106/396381	3
BP	GO:0061326	renal tubule development	3/88	11/2030	0.0100886	0.060644	0.0443766	374148/419106/396381	3
BP	GO:0061333	renal tubule morphogenesis	3/88	11/2030	0.0100886	0.060644	0.0443766	374148/419106/396381	3
BP	GO:0072028	nephron morphogenesis	3/88	11/2030	0.0100886	0.060644	0.0443766	374148/419106/396381	3
BP	GO:0072078	nephron tubule morphogenesis	3/88	11/2030	0.0100886	0.060644	0.0443766	374148/419106/396381	3
BP	GO:0072080	nephron tubule development	3/88	11/2030	0.0100886	0.060644	0.0443766	374148/419106/396381	3
BP	GO:0072088	nephron epithelium morphogenesis	3/88	11/2030	0.0100886	0.060644	0.0443766	374148/419106/396381	3
BP	GO:0072171	mesonephric tubule morphogenesis	3/88	11/2030	0.0100886	0.060644	0.0443766	374148/419106/396381	3
BP	GO:0002684	positive regulation of immune system process	7/88	57/2030	0.0102141	0.0610574	0.044679	554219/395971/395337/419106/395801/771113/417489	7
BP	GO:0051240	positive regulation of multicellular organismal process	11/88	117/2030	0.0105624	0.0627909	0.0459475	395971/395337/374148/396073/100858343/419106/395862/396381/395801/396317/771113	11
BP	GO:0003008	system process	14/88	167/2030	0.0108377	0.0640734	0.0468861	396536/373887/395971/374148/396073/419824/418125/396236/419106/395686/414871/100858404/395241/395594	14
BP	GO:0006955	immune response	10/88	102/2030	0.0110762	0.0646571	0.0473132	396536/554219/395971/395551/395337/100858343/396216/419106/395818/417489	10
BP	GO:0002697	regulation of immune effector process	4/88	21/2030	0.011206	0.0646571	0.0473132	396536/395971/395337/419106	4
BP	GO:0031214	biomineral tissue development	4/88	21/2030	0.011206	0.0646571	0.0473132	374148/418125/396317/396071	4
BP	GO:0045321	leukocyte activation	7/88	58/2030	0.0112145	0.0646571	0.0473132	554219/395971/395337/100858343/419106/395801/417489	7
BP	GO:0045944	positive regulation of transcription by RNA polymerase II	11/88	118/2030	0.0112369	0.0646571	0.0473132	396104/395337/396382/374148/396073/408251/419106/395862/395801/396431/100858404	11
BP	GO:0001816	cytokine production	6/88	45/2030	0.0116535	0.0666977	0.0488064	396536/395971/395337/100858343/419106/396543	6
BP	GO:0008284	positive regulation of cell population proliferation	9/88	88/2030	0.0121597	0.069205	0.0506411	395337/374148/396073/418125/396216/428857/395862/396381/395801	9
BP	GO:0010604	positive regulation of macromolecule metabolic process	22/88	315/2030	0.0122712	0.069205	0.0506411	419184/554219/373887/395971/396104/395337/417319/396382/374148/396073/408251/100858343/420617/428857/419106/395862/396381/395818/395844/395801/396431/100858404	22
BP	GO:0060284	regulation of cell development	7/88	59/2030	0.0122845	0.069205	0.0506411	396213/395337/396216/419106/395801/100858404/771113	7
BP	GO:0001657	ureteric bud development	3/88	12/2030	0.0130346	0.0704785	0.051573	374148/419106/396381	3
BP	GO:0006959	humoral immune response	3/88	12/2030	0.0130346	0.0704785	0.051573	554219/100858343/419106	3
BP	GO:0007189	adenylate cyclase-activating G protein-coupled receptor signaling pathway	3/88	12/2030	0.0130346	0.0704785	0.051573	395971/408251/396256	3
BP	GO:0008016	regulation of heart contraction	3/88	12/2030	0.0130346	0.0704785	0.051573	396073/414871/395241	3
BP	GO:0010632	regulation of epithelial cell migration	3/88	12/2030	0.0130346	0.0704785	0.051573	374148/418125/419106	3
BP	GO:0043542	endothelial cell migration	3/88	12/2030	0.0130346	0.0704785	0.051573	396536/418125/419106	3
BP	GO:0060350	endochondral bone morphogenesis	3/88	12/2030	0.0130346	0.0704785	0.051573	374148/395801/419088	3
BP	GO:0060993	kidney morphogenesis	3/88	12/2030	0.0130346	0.0704785	0.051573	374148/419106/396381	3
BP	GO:0090130	tissue migration	4/88	22/2030	0.0132506	0.0712884	0.0521657	396536/374148/418125/419106	4
BP	GO:0071310	cellular response to organic substance	11/88	121/2030	0.013461	0.0720597	0.0527301	423504/396536/554219/373887/395551/395337/374148/419106/395575/396431/771113	11
BP	GO:0009966	regulation of signal transduction	18/88	243/2030	0.0136724	0.0728292	0.0532931	396536/396023/554219/373887/395971/395551/396104/395337/417319/374148/396073/408251/427841/419106/395818/395801/396543/378901	18
BP	GO:0043269	regulation of monoatomic ion transport	5/88	34/2030	0.0140544	0.0744951	0.0545121	395895/396328/396073/414871/771113	5
BP	GO:0048589	developmental growth	7/88	61/2030	0.0146437	0.0772383	0.0565195	374148/396073/419106/395801/419088/100858404/395241	7
BP	GO:0009615	response to virus	4/88	23/2030	0.0155191	0.0798974	0.0584653	554219/396197/395337/419106	4
BP	GO:0035108	limb morphogenesis	4/88	23/2030	0.0155191	0.0798974	0.0584653	374148/395862/395801/396543	4
BP	GO:0048592	eye morphogenesis	4/88	23/2030	0.0155191	0.0798974	0.0584653	374148/396381/395801/395829	4
BP	GO:0060041	retina development in camera-type eye	4/88	23/2030	0.0155191	0.0798974	0.0584653	373887/374148/396381/395801	4
BP	GO:0071396	cellular response to lipid	4/88	23/2030	0.0155191	0.0798974	0.0584653	395337/374148/395575/771113	4
BP	GO:0032101	regulation of response to external stimulus	7/88	62/2030	0.0159379	0.0799498	0.0585037	396536/554219/395971/395337/395214/419106/395241	7
BP	GO:0001823	mesonephros development	3/88	13/2030	0.0164209	0.0799498	0.0585037	374148/419106/396381	3
BP	GO:0002285	lymphocyte activation involved in immune response	3/88	13/2030	0.0164209	0.0799498	0.0585037	554219/395337/419106	3
BP	GO:0002700	regulation of production of molecular mediator of immune response	3/88	13/2030	0.0164209	0.0799498	0.0585037	396536/395337/419106	3
BP	GO:0060042	retina morphogenesis in camera-type eye	3/88	13/2030	0.0164209	0.0799498	0.0585037	374148/396381/395801	3
BP	GO:0060541	respiratory system development	3/88	13/2030	0.0164209	0.0799498	0.0585037	396536/374148/100858404	3
BP	GO:0072006	nephron development	3/88	13/2030	0.0164209	0.0799498	0.0585037	374148/419106/396381	3
BP	GO:0072009	nephron epithelium development	3/88	13/2030	0.0164209	0.0799498	0.0585037	374148/419106/396381	3
BP	GO:0072163	mesonephric epithelium development	3/88	13/2030	0.0164209	0.0799498	0.0585037	374148/419106/396381	3
BP	GO:0072164	mesonephric tubule development	3/88	13/2030	0.0164209	0.0799498	0.0585037	374148/419106/396381	3
BP	GO:1902105	regulation of leukocyte differentiation	3/88	13/2030	0.0164209	0.0799498	0.0585037	419106/395801/771113	3
BP	GO:1903522	regulation of blood circulation	3/88	13/2030	0.0164209	0.0799498	0.0585037	396073/414871/395241	3
BP	GO:0043410	positive regulation of MAPK cascade	5/88	36/2030	0.0177898	0.0857879	0.0627757	373887/395551/395337/417319/408251	5
BP	GO:0001819	positive regulation of cytokine production	4/88	24/2030	0.0180186	0.0857879	0.0627757	395971/395337/100858343/419106	4
BP	GO:0001837	epithelial to mesenchymal transition	4/88	24/2030	0.0180186	0.0857879	0.0627757	395337/374148/419106/395594	4
BP	GO:0035107	appendage morphogenesis	4/88	24/2030	0.0180186	0.0857879	0.0627757	374148/395862/395801/396543	4
BP	GO:0045216	cell-cell junction organization	4/88	24/2030	0.0180186	0.0857879	0.0627757	419222/415797/374007/395241	4
BP	GO:0045934	negative regulation of nucleobase-containing compound metabolic process	12/88	143/2030	0.0181044	0.0858165	0.0627967	396104/395337/395245/374148/396073/420617/419106/396381/415846/396431/395241/396397	12
BP	GO:0010817	regulation of hormone levels	6/88	50/2030	0.0191177	0.0902222	0.0660206	373887/395337/408251/419106/374211/395844	6
BP	GO:0045892	negative regulation of DNA-templated transcription	10/88	111/2030	0.0194135	0.0904281	0.0661712	396104/395245/374148/396073/419106/396381/415846/396431/395241/396397	10
BP	GO:1902679	negative regulation of RNA biosynthetic process	10/88	111/2030	0.0194135	0.0904281	0.0661712	396104/395245/374148/396073/419106/396381/415846/396431/395241/396397	10
BP	GO:1903507	negative regulation of nucleic acid-templated transcription	10/88	111/2030	0.0194135	0.0904281	0.0661712	396104/395245/374148/396073/419106/396381/415846/396431/395241/396397	10
BP	GO:0002521	leukocyte differentiation	5/88	37/2030	0.0198829	0.0910479	0.0666248	554219/395337/419106/395801/771113	5
BP	GO:0002699	positive regulation of immune effector process	3/88	14/2030	0.0202543	0.0910479	0.0666248	395971/395337/419106	3
BP	GO:0010717	regulation of epithelial to mesenchymal transition	3/88	14/2030	0.0202543	0.0910479	0.0666248	395337/374148/419106	3
BP	GO:0019932	second-messenger-mediated signaling	3/88	14/2030	0.0202543	0.0910479	0.0666248	395971/374148/417489	3
BP	GO:0045637	regulation of myeloid cell differentiation	3/88	14/2030	0.0202543	0.0910479	0.0666248	396216/100858404/771113	3
BP	GO:0050878	regulation of body fluid levels	3/88	14/2030	0.0202543	0.0910479	0.0666248	395337/373926/395594	3
BP	GO:0060349	bone morphogenesis	3/88	14/2030	0.0202543	0.0910479	0.0666248	374148/395801/419088	3
BP	GO:0061053	somite development	3/88	14/2030	0.0202543	0.0910479	0.0666248	418125/395862/395801	3
BP	GO:0051241	negative regulation of multicellular organismal process	7/88	65/2030	0.0203081	0.0910479	0.0666248	396536/395971/374148/419106/395801/100858404/395829	7
BP	GO:0030098	lymphocyte differentiation	4/88	25/2030	0.0207556	0.0922854	0.0675303	554219/395337/419106/395801	4
BP	GO:0050678	regulation of epithelial cell proliferation	4/88	25/2030	0.0207556	0.0922854	0.0675303	374148/396073/419106/100858404	4
BP	GO:0001932	regulation of protein phosphorylation	9/88	97/2030	0.0220669	0.0975985	0.0714182	419184/396536/554219/373887/395337/417319/374148/408251/428857	9
BP	GO:0030111	regulation of Wnt signaling pathway	5/88	38/2030	0.022132	0.0975985	0.0714182	396023/396104/374148/396073/396543	5
BP	GO:0002696	positive regulation of leukocyte activation	4/88	26/2030	0.0237356	0.103399	0.0756625	395971/395337/419106/395801	4
BP	GO:0034765	regulation of monoatomic ion transmembrane transport	4/88	26/2030	0.0237356	0.103399	0.0756625	395895/396328/414871/771113	4
BP	GO:0048872	homeostasis of number of cells	4/88	26/2030	0.0237356	0.103399	0.0756625	395337/374148/419106/100858404	4
BP	GO:0032330	regulation of chondrocyte differentiation	3/88	15/2030	0.024538	0.103553	0.0757756	374148/395801/395829	3
BP	GO:0034332	adherens junction organization	3/88	15/2030	0.024538	0.103553	0.0757756	419222/415797/374007	3
BP	GO:0050870	positive regulation of T cell activation	3/88	15/2030	0.024538	0.103553	0.0757756	395337/419106/395801	3
BP	GO:0051091	positive regulation of DNA-binding transcription factor activity	3/88	15/2030	0.024538	0.103553	0.0757756	373887/395337/395801	3
BP	GO:0072073	kidney epithelium development	3/88	15/2030	0.024538	0.103553	0.0757756	374148/419106/396381	3
BP	GO:0090090	negative regulation of canonical Wnt signaling pathway	3/88	15/2030	0.024538	0.103553	0.0757756	396023/374148/396073	3
BP	GO:1903039	positive regulation of leukocyte cell-cell adhesion	3/88	15/2030	0.024538	0.103553	0.0757756	395337/419106/395801	3
BP	GO:0009611	response to wounding	5/88	39/2030	0.0245409	0.103553	0.0757756	419184/395337/395214/374007/373926	5
BP	GO:0048583	regulation of response to stimulus	21/88	316/2030	0.0247161	0.103885	0.0760184	396536/396023/554219/373887/395971/395551/396104/395337/417319/395214/374148/396073/408251/427841/419106/395818/395801/396543/395241/378901/417489	21
BP	GO:0042592	homeostatic process	11/88	133/2030	0.0258471	0.107894	0.078952	396536/396287/395337/374148/419106/395801/396317/419088/396256/100858404/395594	11
BP	GO:0042221	response to chemical	20/88	298/2030	0.0258705	0.107894	0.078952	423504/396536/554219/373887/395551/396197/395337/396382/374148/419824/419106/395862/396381/396202/395575/396431/417786/419825/771113/396397	20
BP	GO:0042327	positive regulation of phosphorylation	8/88	84/2030	0.0264452	0.109865	0.0803942	419184/554219/373887/395337/417319/374148/408251/428857	8
BP	GO:0002250	adaptive immune response	4/88	27/2030	0.026963	0.110927	0.0811717	554219/395337/419106/417489	4
BP	GO:0050867	positive regulation of cell activation	4/88	27/2030	0.026963	0.110927	0.0811717	395971/395337/419106/395801	4
BP	GO:0001667	ameboidal-type cell migration	5/88	40/2030	0.0271133	0.110927	0.0811717	396536/396035/374148/418125/419106	5
BP	GO:0031347	regulation of defense response	5/88	40/2030	0.0271133	0.110927	0.0811717	396536/554219/395971/395337/419106	5
BP	GO:0006814	sodium ion transport	3/88	16/2030	0.0292722	0.118856	0.0869738	396073/426883/771113	3
BP	GO:0022409	positive regulation of cell-cell adhesion	3/88	16/2030	0.0292722	0.118856	0.0869738	395337/419106/395801	3
BP	GO:0045893	positive regulation of DNA-templated transcription	13/88	171/2030	0.0296655	0.118967	0.0870545	373887/396104/395337/396382/374148/396073/408251/419106/395862/396381/395801/396431/100858404	13
BP	GO:1902680	positive regulation of RNA biosynthetic process	13/88	171/2030	0.0296655	0.118967	0.0870545	373887/396104/395337/396382/374148/396073/408251/419106/395862/396381/395801/396431/100858404	13
BP	GO:1903508	positive regulation of nucleic acid-templated transcription	13/88	171/2030	0.0296655	0.118967	0.0870545	373887/396104/395337/396382/374148/396073/408251/419106/395862/396381/395801/396431/100858404	13
BP	GO:0060537	muscle tissue development	5/88	41/2030	0.0298522	0.118967	0.0870545	419184/374148/396073/396236/395801	5
BP	GO:0090596	sensory organ morphogenesis	5/88	41/2030	0.0298522	0.118967	0.0870545	374148/419106/396381/395801/395829	5
BP	GO:0042060	wound healing	4/88	28/2030	0.0304415	0.119544	0.087477	419184/395337/374007/373926	4
BP	GO:0043087	regulation of GTPase activity	4/88	28/2030	0.0304415	0.119544	0.087477	419184/395551/408251/427841	4
BP	GO:0045785	positive regulation of cell adhesion	4/88	28/2030	0.0304415	0.119544	0.087477	396536/395337/419106/395801	4
BP	GO:0051604	protein maturation	4/88	28/2030	0.0304415	0.119544	0.087477	395801/395266/373926/771113	4
BP	GO:0019220	regulation of phosphate metabolic process	11/88	137/2030	0.0314148	0.122472	0.0896197	419184/396536/554219/373887/395971/395337/417319/374148/408251/428857/395801	11
BP	GO:0051174	regulation of phosphorus metabolic process	11/88	137/2030	0.0314148	0.122472	0.0896197	419184/396536/554219/373887/395971/395337/417319/374148/408251/428857/395801	11
BP	GO:0009890	negative regulation of biosynthetic process	11/88	138/2030	0.0329323	0.126529	0.0925882	396104/395337/395245/374148/396073/419106/396381/415846/396431/395241/396397	11
BP	GO:0010646	regulation of cell communication	18/88	267/2030	0.0332424	0.126529	0.0925882	396536/396023/554219/373887/395971/395551/396104/395337/417319/374148/396073/408251/427841/419106/395818/395801/396543/378901	18
BP	GO:0061061	muscle structure development	7/88	72/2030	0.0336356	0.126529	0.0925882	419184/396536/374148/396073/396236/395862/395241	7
BP	GO:0003013	circulatory system process	4/88	29/2030	0.0341741	0.126529	0.0925882	395971/396073/414871/395241	4
BP	GO:0008015	blood circulation	4/88	29/2030	0.0341741	0.126529	0.0925882	395971/396073/414871/395241	4
BP	GO:1903131	mononuclear cell differentiation	4/88	29/2030	0.0341741	0.126529	0.0925882	554219/395337/419106/395801	4
BP	GO:0023051	regulation of signaling	18/88	268/2030	0.0343699	0.126529	0.0925882	396536/396023/554219/373887/395971/395551/396104/395337/417319/374148/396073/408251/427841/419106/395818/395801/396543/378901	18
BP	GO:0001649	osteoblast differentiation	3/88	17/2030	0.0344545	0.126529	0.0925882	395337/374148/395801	3
BP	GO:0001708	cell fate specification	3/88	17/2030	0.0344545	0.126529	0.0925882	396382/374148/395801	3
BP	GO:0002443	leukocyte mediated immunity	3/88	17/2030	0.0344545	0.126529	0.0925882	395971/419106/417489	3
BP	GO:0021510	spinal cord development	3/88	17/2030	0.0344545	0.126529	0.0925882	396381/395844/396397	3
BP	GO:0021953	central nervous system neuron differentiation	3/88	17/2030	0.0344545	0.126529	0.0925882	396381/395844/396397	3
BP	GO:0030217	T cell differentiation	3/88	17/2030	0.0344545	0.126529	0.0925882	395337/419106/395801	3
BP	GO:0030326	embryonic limb morphogenesis	3/88	17/2030	0.0344545	0.126529	0.0925882	395862/395801/396543	3
BP	GO:0030522	intracellular receptor signaling pathway	3/88	17/2030	0.0344545	0.126529	0.0925882	554219/395575/396431	3
BP	GO:0031099	regeneration	3/88	17/2030	0.0344545	0.126529	0.0925882	395337/395214/395241	3
BP	GO:0051781	positive regulation of cell division	3/88	17/2030	0.0344545	0.126529	0.0925882	418125/423196/428857	3
BP	GO:0051247	positive regulation of protein metabolic process	10/88	122/2030	0.0350251	0.128187	0.0938015	419184/554219/373887/395337/417319/374148/408251/428857/419106/395818	10
BP	GO:0048646	anatomical structure formation involved in morphogenesis	10/88	123/2030	0.0367865	0.134177	0.0981848	396035/374148/396073/418125/374007/419106/396381/395801/419088/100858404	10
BP	GO:0002694	regulation of leukocyte activation	4/88	30/2030	0.0381625	0.138726	0.101513	395971/395337/419106/395801	4
BP	GO:0051049	regulation of transport	9/88	107/2030	0.0387924	0.140018	0.102459	396536/395971/395895/396328/395337/396073/408251/414871/771113	9
BP	GO:0031328	positive regulation of cellular biosynthetic process	14/88	196/2030	0.0389577	0.140018	0.102459	373887/395971/396104/395337/396382/374148/396073/408251/419106/395862/396381/395801/396431/100858404	14
BP	GO:0051173	positive regulation of nitrogen compound metabolic process	19/88	292/2030	0.0398396	0.140018	0.102459	419184/554219/373887/395971/396104/395337/417319/396382/374148/396073/408251/428857/419106/395862/396381/395818/395801/396431/100858404	19
BP	GO:0002262	myeloid cell homeostasis	3/88	18/2030	0.0400796	0.140018	0.102459	395337/419106/100858404	3
BP	GO:0002274	myeloid leukocyte activation	3/88	18/2030	0.0400796	0.140018	0.102459	395971/100858343/417489	3
BP	GO:0003015	heart process	3/88	18/2030	0.0400796	0.140018	0.102459	396073/414871/395241	3
BP	GO:0003407	neural retina development	3/88	18/2030	0.0400796	0.140018	0.102459	374148/396381/395801	3
BP	GO:0007159	leukocyte cell-cell adhesion	3/88	18/2030	0.0400796	0.140018	0.102459	395337/419106/395801	3
BP	GO:0007188	adenylate cyclase-modulating G protein-coupled receptor signaling pathway	3/88	18/2030	0.0400796	0.140018	0.102459	395971/408251/396256	3
BP	GO:0035113	embryonic appendage morphogenesis	3/88	18/2030	0.0400796	0.140018	0.102459	395862/395801/396543	3
BP	GO:0060047	heart contraction	3/88	18/2030	0.0400796	0.140018	0.102459	396073/414871/395241	3
BP	GO:1903037	regulation of leukocyte cell-cell adhesion	3/88	18/2030	0.0400796	0.140018	0.102459	395337/419106/395801	3
BP	GO:0007423	sensory organ development	7/88	75/2030	0.0408149	0.142126	0.104001	373887/374148/396056/419106/396381/395801/395829	7
BP	GO:0009891	positive regulation of biosynthetic process	14/88	198/2030	0.0419832	0.144803	0.10596	373887/395971/396104/395337/396382/374148/396073/408251/419106/395862/396381/395801/396431/100858404	14
BP	GO:0034762	regulation of transmembrane transport	4/88	31/2030	0.042408	0.144803	0.10596	395895/396328/414871/771113	4
BP	GO:0046879	hormone secretion	4/88	31/2030	0.042408	0.144803	0.10596	373887/395337/408251/419106	4
BP	GO:0050865	regulation of cell activation	4/88	31/2030	0.042408	0.144803	0.10596	395971/395337/419106/395801	4
BP	GO:0031399	regulation of protein modification process	10/88	126/2030	0.0424423	0.144803	0.10596	419184/396536/554219/373887/395337/417319/374148/408251/428857/419106	10
BP	GO:0046649	lymphocyte activation	5/88	45/2030	0.0425256	0.144803	0.10596	554219/395337/419106/395801/417489	5
BP	GO:0048762	mesenchymal cell differentiation	5/88	45/2030	0.0425256	0.144803	0.10596	395337/396035/374148/419106/395594	5
BP	GO:0022603	regulation of anatomical structure morphogenesis	6/88	60/2030	0.0426632	0.144813	0.105967	373887/374148/419106/396381/395801/100858404	6
BP	GO:0000122	negative regulation of transcription by RNA polymerase II	7/88	76/2030	0.0434155	0.146903	0.107497	396104/395245/374148/396073/419106/396431/395241	7
BP	GO:0045935	positive regulation of nucleobase-containing compound metabolic process	14/88	199/2030	0.0435579	0.146922	0.107511	373887/395971/396104/395337/396382/374148/396073/408251/419106/395862/396381/395801/396431/100858404	14
BP	GO:0006954	inflammatory response	5/88	46/2030	0.0461331	0.153232	0.112129	396536/395971/395551/395337/419106	5
BP	GO:0032102	negative regulation of response to external stimulus	3/88	19/2030	0.0461406	0.153232	0.112129	396536/395214/419106	3
BP	GO:0045445	myoblast differentiation	3/88	19/2030	0.0461406	0.153232	0.112129	396536/374148/395862	3
BP	GO:0050863	regulation of T cell activation	3/88	19/2030	0.0461406	0.153232	0.112129	395337/419106/395801	3
BP	GO:0090257	regulation of muscle system process	3/88	19/2030	0.0461406	0.153232	0.112129	395971/396073/396236	3
BP	GO:0009914	hormone transport	4/88	32/2030	0.0469108	0.154361	0.112954	373887/395337/408251/419106	4
BP	GO:0010720	positive regulation of cell development	4/88	32/2030	0.0469108	0.154361	0.112954	395337/419106/395801/771113	4
BP	GO:0042110	T cell activation	4/88	32/2030	0.0469108	0.154361	0.112954	554219/395337/419106/395801	4
BP	GO:0051254	positive regulation of RNA metabolic process	13/88	183/2030	0.0479547	0.157315	0.115116	373887/396104/395337/396382/374148/396073/408251/419106/395862/396381/395801/396431/100858404	13
BP	GO:0010557	positive regulation of macromolecule biosynthetic process	13/88	185/2030	0.0516389	0.166553	0.121876	373887/396104/395337/396382/374148/396073/408251/419106/395862/396381/395801/396431/100858404	13
BP	GO:0000165	MAPK cascade	6/88	63/2030	0.052237	0.166553	0.121876	373887/395551/395337/417319/374148/408251	6
BP	GO:0032940	secretion by cell	6/88	63/2030	0.052237	0.166553	0.121876	373887/395971/395337/408251/419106/417489	6
BP	GO:0001822	kidney development	3/88	20/2030	0.0526283	0.166553	0.121876	374148/419106/396381	3
BP	GO:0008406	gonad development	3/88	20/2030	0.0526283	0.166553	0.121876	373887/374148/419106	3
BP	GO:0008543	fibroblast growth factor receptor signaling pathway	3/88	20/2030	0.0526283	0.166553	0.121876	428857/419106/396543	3
BP	GO:0030178	negative regulation of Wnt signaling pathway	3/88	20/2030	0.0526283	0.166553	0.121876	396023/374148/396073	3
BP	GO:0033002	muscle cell proliferation	3/88	20/2030	0.0526283	0.166553	0.121876	419184/395337/396073	3
BP	GO:0045137	development of primary sexual characteristics	3/88	20/2030	0.0526283	0.166553	0.121876	373887/374148/419106	3
BP	GO:0046651	lymphocyte proliferation	3/88	20/2030	0.0526283	0.166553	0.121876	554219/395337/395801	3
BP	GO:0061035	regulation of cartilage development	3/88	20/2030	0.0526283	0.166553	0.121876	374148/395801/395829	3
BP	GO:0072001	renal system development	3/88	20/2030	0.0526283	0.166553	0.121876	374148/419106/396381	3
BP	GO:1902531	regulation of intracellular signal transduction	10/88	131/2030	0.0531564	0.167731	0.122738	396536/373887/395971/395551/395337/417319/374148/408251/427841/419106	10
BP	GO:0065009	regulation of molecular function	16/88	243/2030	0.0533978	0.168	0.122935	396329/419184/396536/373887/395971/395551/395337/417319/408251/427841/419106/395818/395801/395241/378901/771113	16
BP	GO:0040007	growth	7/88	80/2030	0.0548869	0.172181	0.125995	374148/396073/419106/395801/419088/100858404/395241	7
BP	GO:0048523	negative regulation of cellular process	25/88	425/2030	0.0553303	0.173068	0.126643	419184/396536/396023/554219/373887/396104/396197/395337/414143/395245/395214/374148/396073/420617/374007/419106/396381/395801/415846/396431/100858404/395241/378901/396397/395829	25
BP	GO:0032879	regulation of localization	10/88	132/2030	0.0554991	0.173093	0.126662	419184/396536/395971/395895/396328/395337/396073/408251/414871/771113	10
BP	GO:0048522	positive regulation of cellular process	28/88	488/2030	0.0558036	0.17354	0.126989	419184/396536/554219/373887/395971/395551/396104/395337/417319/396382/374148/396073/408251/418125/423196/396216/428857/419106/395862/396381/395818/395801/396431/396543/100858404/395241/771113/419070	28
BP	GO:0007166	cell surface receptor signaling pathway	18/88	284/2030	0.0565496	0.174269	0.127522	396536/396023/554219/373887/395971/395551/396104/395337/395214/374148/396073/428857/419106/395801/395266/396543/417489/395829	18
BP	GO:0030099	myeloid cell differentiation	4/88	34/2030	0.0566861	0.174269	0.127522	396216/419106/100858404/771113	4
BP	GO:0031589	cell-substrate adhesion	4/88	34/2030	0.0566861	0.174269	0.127522	396536/373887/395686/373926	4
BP	GO:0045860	positive regulation of protein kinase activity	4/88	34/2030	0.0566861	0.174269	0.127522	419184/373887/417319/408251	4
BP	GO:0031349	positive regulation of defense response	3/88	21/2030	0.059532	0.18095	0.132411	554219/395971/395337	3
BP	GO:0032943	mononuclear cell proliferation	3/88	21/2030	0.059532	0.18095	0.132411	554219/395337/395801	3
BP	GO:0044344	cellular response to fibroblast growth factor stimulus	3/88	21/2030	0.059532	0.18095	0.132411	428857/419106/396543	3
BP	GO:0051090	regulation of DNA-binding transcription factor activity	3/88	21/2030	0.059532	0.18095	0.132411	373887/395337/395801	3
BP	GO:0010558	negative regulation of macromolecule biosynthetic process	10/88	134/2030	0.0603892	0.183039	0.13394	396104/395245/374148/396073/419106/396381/415846/396431/395241/396397	10
BP	GO:0071772	response to BMP	4/88	35/2030	0.0619554	0.187259	0.137027	395214/374148/396073/419106	4
BP	GO:0046903	secretion	6/88	66/2030	0.0630347	0.189987	0.139024	373887/395971/395337/408251/419106/417489	6
BP	GO:0042325	regulation of phosphorylation	9/88	118/2030	0.0654983	0.191824	0.140368	419184/396536/554219/373887/395337/417319/374148/408251/428857	9
BP	GO:0031327	negative regulation of cellular biosynthetic process	10/88	136/2030	0.065556	0.191824	0.140368	396104/395245/374148/396073/419106/396381/415846/396431/395241/396397	10
BP	GO:0002275	myeloid cell activation involved in immune response	2/88	10/2030	0.0666767	0.191824	0.140368	395971/417489	2
BP	GO:0003279	cardiac septum development	2/88	10/2030	0.0666767	0.191824	0.140368	396073/419106	2
BP	GO:0007596	blood coagulation	2/88	10/2030	0.0666767	0.191824	0.140368	395337/373926	2
BP	GO:0010634	positive regulation of epithelial cell migration	2/88	10/2030	0.0666767	0.191824	0.140368	374148/419106	2
BP	GO:0010718	positive regulation of epithelial to mesenchymal transition	2/88	10/2030	0.0666767	0.191824	0.140368	395337/374148	2
BP	GO:0030902	hindbrain development	2/88	10/2030	0.0666767	0.191824	0.140368	373887/396381	2
BP	GO:0034446	substrate adhesion-dependent cell spreading	2/88	10/2030	0.0666767	0.191824	0.140368	396536/373887	2
BP	GO:0046530	photoreceptor cell differentiation	2/88	10/2030	0.0666767	0.191824	0.140368	374148/395801	2
BP	GO:1904019	epithelial cell apoptotic process	2/88	10/2030	0.0666767	0.191824	0.140368	396073/419106	2
BP	GO:0002440	production of molecular mediator of immune response	3/88	22/2030	0.0668396	0.191824	0.140368	396536/395337/419106	3
BP	GO:0002683	negative regulation of immune system process	3/88	22/2030	0.0668396	0.191824	0.140368	396536/374148/395801	3
BP	GO:0002757	immune response-activating signaling pathway	3/88	22/2030	0.0668396	0.191824	0.140368	554219/419106/417489	3
BP	GO:0042445	hormone metabolic process	3/88	22/2030	0.0668396	0.191824	0.140368	419106/374211/395844	3
BP	GO:0062012	regulation of small molecule metabolic process	3/88	22/2030	0.0668396	0.191824	0.140368	396536/395971/374148	3
BP	GO:0071774	response to fibroblast growth factor	3/88	22/2030	0.0668396	0.191824	0.140368	428857/419106/396543	3
BP	GO:0008285	negative regulation of cell population proliferation	5/88	51/2030	0.0668532	0.191824	0.140368	419184/414143/374148/419106/395801	5
BP	GO:0031325	positive regulation of cellular metabolic process	18/88	292/2030	0.0708384	0.202413	0.148117	419184/554219/373887/395971/396104/395337/417319/396382/374148/396073/408251/428857/419106/395862/396381/395801/396431/100858404	18
BP	GO:0140352	export from cell	6/88	68/2030	0.0709199	0.202413	0.148117	373887/395971/395337/408251/419106/417489	6
BP	GO:0003006	developmental process involved in reproduction	5/88	52/2030	0.0715337	0.203005	0.14855	373887/374148/419106/396381/395801	5
BP	GO:0051347	positive regulation of transferase activity	5/88	52/2030	0.0715337	0.203005	0.14855	419184/396536/373887/417319/408251	5
BP	GO:0051336	regulation of hydrolase activity	7/88	85/2030	0.0716932	0.203005	0.14855	419184/396536/395551/408251/427841/395818/395801	7
BP	GO:0050808	synapse organization	4/88	37/2030	0.073245	0.206855	0.151367	396035/419824/428253/419825	4
BP	GO:0002764	immune response-regulating signaling pathway	3/88	23/2030	0.0745377	0.207242	0.15165	554219/419106/417489	3
BP	GO:0007548	sex differentiation	3/88	23/2030	0.0745377	0.207242	0.15165	373887/374148/419106	3
BP	GO:0042113	B cell activation	3/88	23/2030	0.0745377	0.207242	0.15165	554219/395337/417489	3
BP	GO:0048608	reproductive structure development	3/88	23/2030	0.0745377	0.207242	0.15165	373887/374148/419106	3
BP	GO:0051251	positive regulation of lymphocyte activation	3/88	23/2030	0.0745377	0.207242	0.15165	395337/419106/395801	3
BP	GO:0061458	reproductive system development	3/88	23/2030	0.0745377	0.207242	0.15165	373887/374148/419106	3
BP	GO:0002703	regulation of leukocyte mediated immunity	2/88	11/2030	0.0792518	0.212127	0.155225	395971/419106	2
BP	GO:0003205	cardiac chamber development	2/88	11/2030	0.0792518	0.212127	0.155225	396073/419106	2
BP	GO:0003206	cardiac chamber morphogenesis	2/88	11/2030	0.0792518	0.212127	0.155225	396073/419106	2
BP	GO:0003231	cardiac ventricle development	2/88	11/2030	0.0792518	0.212127	0.155225	396073/419106	2
BP	GO:0006720	isoprenoid metabolic process	2/88	11/2030	0.0792518	0.212127	0.155225	374211/395844	2
BP	GO:0006721	terpenoid metabolic process	2/88	11/2030	0.0792518	0.212127	0.155225	374211/395844	2
BP	GO:0007599	hemostasis	2/88	11/2030	0.0792518	0.212127	0.155225	395337/373926	2
BP	GO:0014855	striated muscle cell proliferation	2/88	11/2030	0.0792518	0.212127	0.155225	419184/396073	2
BP	GO:0042157	lipoprotein metabolic process	2/88	11/2030	0.0792518	0.212127	0.155225	396536/428583	2
BP	GO:0043406	positive regulation of MAP kinase activity	2/88	11/2030	0.0792518	0.212127	0.155225	373887/417319	2
BP	GO:0043491	protein kinase B signaling	2/88	11/2030	0.0792518	0.212127	0.155225	374148/419106	2
BP	GO:0050817	coagulation	2/88	11/2030	0.0792518	0.212127	0.155225	395337/373926	2
BP	GO:0050851	antigen receptor-mediated signaling pathway	2/88	11/2030	0.0792518	0.212127	0.155225	419106/417489	2
BP	GO:0070374	positive regulation of ERK1 and ERK2 cascade	2/88	11/2030	0.0792518	0.212127	0.155225	395551/408251	2
BP	GO:1904892	regulation of receptor signaling pathway via STAT	2/88	11/2030	0.0792518	0.212127	0.155225	554219/395337	2
BP	GO:0006952	defense response	8/88	105/2030	0.0807999	0.215734	0.157864	396536/554219/395971/395551/395337/100858343/419106/396218	8
BP	GO:0070661	leukocyte proliferation	3/88	24/2030	0.0826118	0.219482	0.160607	554219/395337/395801	3
BP	GO:0071496	cellular response to external stimulus	3/88	24/2030	0.0826118	0.219482	0.160607	395971/396197/374148	3
BP	GO:0070848	response to growth factor	7/88	88/2030	0.0831132	0.22027	0.161184	373887/395214/374148/396073/428857/419106/396543	7
BP	GO:0030001	metal ion transport	6/88	72/2030	0.0883351	0.233535	0.17089	395895/396328/396073/414871/426883/771113	6
BP	GO:0010468	regulation of gene expression	27/88	488/2030	0.0887009	0.233927	0.171177	396536/373887/395971/396104/395337/395245/396382/374148/396073/408251/100858343/420617/428857/419106/395862/396381/395844/395801/395575/415846/396431/396543/395307/100858404/395231/395241/396397	27
BP	GO:0045664	regulation of neuron differentiation	3/88	25/2030	0.0910468	0.236964	0.1734	374148/396073/419070	3
BP	GO:0051302	regulation of cell division	3/88	25/2030	0.0910468	0.236964	0.1734	418125/423196/428857	3
BP	GO:1901700	response to oxygen-containing compound	8/88	108/2030	0.0918538	0.236964	0.1734	423504/395337/396382/374148/395862/396381/395575/771113	8
BP	GO:0043408	regulation of MAPK cascade	5/88	56/2030	0.0920141	0.236964	0.1734	373887/395551/395337/417319/408251	5
BP	GO:0001889	liver development	2/88	12/2030	0.0924953	0.236964	0.1734	395337/374148	2
BP	GO:0008584	male gonad development	2/88	12/2030	0.0924953	0.236964	0.1734	374148/419106	2
BP	GO:0010586	miRNA metabolic process	2/88	12/2030	0.0924953	0.236964	0.1734	374148/419106	2
BP	GO:0046546	development of primary male sexual characteristics	2/88	12/2030	0.0924953	0.236964	0.1734	374148/419106	2
BP	GO:0060986	endocrine hormone secretion	2/88	12/2030	0.0924953	0.236964	0.1734	373887/419106	2
BP	GO:0061008	hepaticobiliary system development	2/88	12/2030	0.0924953	0.236964	0.1734	395337/374148	2
BP	GO:0098659	inorganic cation import across plasma membrane	2/88	12/2030	0.0924953	0.236964	0.1734	395895/396328	2
BP	GO:0099587	inorganic ion import across plasma membrane	2/88	12/2030	0.0924953	0.236964	0.1734	395895/396328	2
BP	GO:0009719	response to endogenous stimulus	11/88	165/2030	0.0957536	0.244729	0.179082	423504/373887/395337/395214/374148/396073/428857/419106/395575/396431/396543	11
BP	GO:0051050	positive regulation of transport	5/88	57/2030	0.0975649	0.248767	0.182037	396536/395971/396073/408251/771113	5
BP	GO:0050778	positive regulation of immune response	4/88	41/2030	0.0987191	0.251115	0.183755	554219/395971/419106/417489	4
BP	GO:0048545	response to steroid hormone	3/88	26/2030	0.0998265	0.252737	0.184942	423504/395337/395575	3
BP	GO:0070371	ERK1 and ERK2 cascade	3/88	26/2030	0.0998265	0.252737	0.184942	395551/374148/408251	3
BP	GO:0006357	regulation of transcription by RNA polymerase II	17/88	286/2030	0.102469	0.258818	0.189392	396104/395337/395245/396382/374148/396073/408251/419106/395862/396381/395801/396431/395307/100858404/395231/395241/396397	17
BP	GO:0030334	regulation of cell migration	5/88	58/2030	0.103284	0.258841	0.189408	373887/374148/418125/428857/419106	5
BP	GO:0050790	regulation of catalytic activity	13/88	207/2030	0.105573	0.258841	0.189408	396329/419184/396536/373887/395971/395551/417319/408251/427841/395818/395801/378901/771113	13
BP	GO:0023061	signal release	4/88	42/2030	0.105662	0.258841	0.189408	373887/395337/408251/419106	4
BP	GO:0065008	regulation of biological quality	14/88	227/2030	0.106157	0.258841	0.189408	396536/373887/395971/395337/396035/408251/420617/419106/374211/395844/414871/373926/771113/395594	14
BP	GO:0007605	sensory perception of sound	2/88	13/2030	0.106327	0.258841	0.189408	373887/395686	2
BP	GO:0009798	axis specification	2/88	13/2030	0.106327	0.258841	0.189408	396381/419088	2
BP	GO:0033135	regulation of peptidyl-serine phosphorylation	2/88	13/2030	0.106327	0.258841	0.189408	554219/395337	2
BP	GO:0033138	positive regulation of peptidyl-serine phosphorylation	2/88	13/2030	0.106327	0.258841	0.189408	554219/395337	2
BP	GO:0035725	sodium ion transmembrane transport	2/88	13/2030	0.106327	0.258841	0.189408	426883/771113	2
BP	GO:0045055	regulated exocytosis	2/88	13/2030	0.106327	0.258841	0.189408	395971/417489	2
BP	GO:0045661	regulation of myoblast differentiation	2/88	13/2030	0.106327	0.258841	0.189408	374148/395862	2
BP	GO:0046661	male sex differentiation	2/88	13/2030	0.106327	0.258841	0.189408	374148/419106	2
BP	GO:0050829	defense response to Gram-negative bacterium	2/88	13/2030	0.106327	0.258841	0.189408	100858343/396218	2
BP	GO:0050954	sensory perception of mechanical stimulus	2/88	13/2030	0.106327	0.258841	0.189408	373887/395686	2
BP	GO:0051153	regulation of striated muscle cell differentiation	2/88	13/2030	0.106327	0.258841	0.189408	396073/395241	2
BP	GO:0051262	protein tetramerization	2/88	13/2030	0.106327	0.258841	0.189408	396328/395844	2
BP	GO:0002253	activation of immune response	3/88	27/2030	0.108934	0.262783	0.192293	554219/419106/417489	3
BP	GO:0032103	positive regulation of response to external stimulus	3/88	27/2030	0.108934	0.262783	0.192293	554219/395971/395337	3
BP	GO:0051249	regulation of lymphocyte activation	3/88	27/2030	0.108934	0.262783	0.192293	395337/419106/395801	3
BP	GO:0060348	bone development	3/88	27/2030	0.108934	0.262783	0.192293	374148/395801/419088	3
BP	GO:0048514	blood vessel morphogenesis	5/88	59/2030	0.109167	0.262783	0.192293	373887/396073/395801/100858404/395594	5
BP	GO:0043207	response to external biotic stimulus	7/88	95/2030	0.113631	0.272309	0.199263	554219/395551/396197/395337/100858343/419106/396218	7
BP	GO:0051707	response to other organism	7/88	95/2030	0.113631	0.272309	0.199263	554219/395551/396197/395337/100858343/419106/396218	7
BP	GO:2000145	regulation of cell motility	5/88	60/2030	0.115213	0.275487	0.201589	373887/374148/418125/428857/419106	5
BP	GO:0051260	protein homooligomerization	3/88	28/2030	0.118354	0.281484	0.205977	396328/395844/426883	3
BP	GO:0009607	response to biotic stimulus	7/88	96/2030	0.118423	0.281484	0.205977	554219/395551/396197/395337/100858343/419106/396218	7
BP	GO:0006366	transcription by RNA polymerase II	17/88	292/2030	0.118506	0.281484	0.205977	396104/395337/395245/396382/374148/396073/408251/419106/395862/396381/395801/396431/395307/100858404/395231/395241/396397	17
BP	GO:0048519	negative regulation of biological process	26/88	482/2030	0.120371	0.282269	0.206551	419184/396536/396023/554219/373887/395971/396104/396197/395337/414143/395245/395214/374148/396073/420617/374007/419106/396381/395801/415846/396431/100858404/395241/378901/396397/395829	26
BP	GO:0001894	tissue homeostasis	2/88	14/2030	0.120672	0.282269	0.206551	374148/395801	2
BP	GO:0009755	hormone-mediated signaling pathway	2/88	14/2030	0.120672	0.282269	0.206551	395575/396431	2
BP	GO:0019216	regulation of lipid metabolic process	2/88	14/2030	0.120672	0.282269	0.206551	396536/374148	2
BP	GO:0043405	regulation of MAP kinase activity	2/88	14/2030	0.120672	0.282269	0.206551	373887/417319	2
BP	GO:0050886	endocrine process	2/88	14/2030	0.120672	0.282269	0.206551	373887/419106	2
BP	GO:0060249	anatomical structure homeostasis	2/88	14/2030	0.120672	0.282269	0.206551	374148/395801	2
BP	GO:0001568	blood vessel development	5/88	62/2030	0.127778	0.297969	0.21804	373887/396073/395801/100858404/395594	5
BP	GO:0007369	gastrulation	3/88	29/2030	0.128067	0.297969	0.21804	396536/396381/419088	3
BP	GO:0006355	regulation of DNA-templated transcription	20/88	358/2030	0.128769	0.297969	0.21804	373887/396104/395337/395245/396382/374148/396073/408251/419106/395862/396381/395801/395575/415846/396431/395307/100858404/395231/395241/396397	20
BP	GO:1903506	regulation of nucleic acid-templated transcription	20/88	358/2030	0.128769	0.297969	0.21804	373887/396104/395337/395245/396382/374148/396073/408251/419106/395862/396381/395801/395575/415846/396431/395307/100858404/395231/395241/396397	20
BP	GO:2001141	regulation of RNA biosynthetic process	20/88	358/2030	0.128769	0.297969	0.21804	373887/396104/395337/395245/396382/374148/396073/408251/419106/395862/396381/395801/395575/415846/396431/395307/100858404/395231/395241/396397	20
BP	GO:0031324	negative regulation of cellular metabolic process	12/88	195/2030	0.131466	0.303558	0.22213	396104/395337/395245/374148/396073/420617/419106/396381/415846/396431/395241/396397	12
BP	GO:0002460	adaptive immune response based on somatic recombination of immune receptors built from immunoglobulin superfamily domains	2/88	15/2030	0.135462	0.304295	0.22267	395337/419106	2
BP	GO:0002573	myeloid leukocyte differentiation	2/88	15/2030	0.135462	0.304295	0.22267	419106/771113	2
BP	GO:0002791	regulation of peptide secretion	2/88	15/2030	0.135462	0.304295	0.22267	395337/408251	2
BP	GO:0007586	digestion	2/88	15/2030	0.135462	0.304295	0.22267	396536/374148	2
BP	GO:0014065	phosphatidylinositol 3-kinase signaling	2/88	15/2030	0.135462	0.304295	0.22267	374148/419106	2
BP	GO:0048015	phosphatidylinositol-mediated signaling	2/88	15/2030	0.135462	0.304295	0.22267	374148/419106	2
BP	GO:0048017	inositol lipid-mediated signaling	2/88	15/2030	0.135462	0.304295	0.22267	374148/419106	2
BP	GO:0050670	regulation of lymphocyte proliferation	2/88	15/2030	0.135462	0.304295	0.22267	395337/395801	2
BP	GO:0062013	positive regulation of small molecule metabolic process	2/88	15/2030	0.135462	0.304295	0.22267	396536/395971	2
BP	GO:0071902	positive regulation of protein serine/threonine kinase activity	2/88	15/2030	0.135462	0.304295	0.22267	373887/417319	2
BP	GO:0090087	regulation of peptide transport	2/88	15/2030	0.135462	0.304295	0.22267	395337/408251	2
BP	GO:0090276	regulation of peptide hormone secretion	2/88	15/2030	0.135462	0.304295	0.22267	395337/408251	2
BP	GO:0098739	import across plasma membrane	2/88	15/2030	0.135462	0.304295	0.22267	395895/396328	2
BP	GO:0071214	cellular response to abiotic stimulus	3/88	30/2030	0.138056	0.308832	0.225989	374148/419106/426883	3
BP	GO:0104004	cellular response to environmental stimulus	3/88	30/2030	0.138056	0.308832	0.225989	374148/419106/426883	3
BP	GO:0040012	regulation of locomotion	5/88	64/2030	0.14095	0.314653	0.230249	373887/374148/418125/428857/419106	5
BP	GO:0033674	positive regulation of kinase activity	4/88	47/2030	0.143515	0.319053	0.233469	419184/373887/417319/408251	4
BP	GO:0034329	cell junction assembly	4/88	47/2030	0.143515	0.319053	0.233469	419222/415797/374007/395241	4
BP	GO:0042981	regulation of apoptotic process	7/88	101/2030	0.143943	0.319345	0.233682	396197/395337/374148/396073/419106/395818/100858404	7
BP	GO:0048638	regulation of developmental growth	3/88	31/2030	0.148304	0.326775	0.239119	396073/395801/395241	3
BP	GO:0090287	regulation of cellular response to growth factor stimulus	3/88	31/2030	0.148304	0.326775	0.239119	373887/419106/396543	3
BP	GO:0001764	neuron migration	2/88	16/2030	0.150632	0.326775	0.239119	419106/396381	2
BP	GO:0002429	immune response-activating cell surface receptor signaling pathway	2/88	16/2030	0.150632	0.326775	0.239119	419106/417489	2
BP	GO:0006937	regulation of muscle contraction	2/88	16/2030	0.150632	0.326775	0.239119	395971/396073	2
BP	GO:0030073	insulin secretion	2/88	16/2030	0.150632	0.326775	0.239119	395337/408251	2
BP	GO:0032944	regulation of mononuclear cell proliferation	2/88	16/2030	0.150632	0.326775	0.239119	395337/395801	2
BP	GO:0050679	positive regulation of epithelial cell proliferation	2/88	16/2030	0.150632	0.326775	0.239119	374148/396073	2
BP	GO:0051607	defense response to virus	2/88	16/2030	0.150632	0.326775	0.239119	554219/395337	2
BP	GO:0098657	import into cell	2/88	16/2030	0.150632	0.326775	0.239119	395895/396328	2
BP	GO:0140546	defense response to symbiont	2/88	16/2030	0.150632	0.326775	0.239119	554219/395337	2
BP	GO:0001944	vasculature development	5/88	66/2030	0.154699	0.333902	0.244335	373887/396073/395801/100858404/395594	5
BP	GO:0009725	response to hormone	5/88	66/2030	0.154699	0.333902	0.244335	423504/395337/419106/395575/396431	5
BP	GO:0044419	biological process involved in interspecies interaction between organisms	7/88	103/2030	0.154849	0.333902	0.244335	554219/395551/396197/395337/100858343/419106/396218	7
BP	GO:0043065	positive regulation of apoptotic process	3/88	32/2030	0.158793	0.341722	0.250057	395337/395818/100858404	3
BP	GO:0051252	regulation of RNA metabolic process	21/88	390/2030	0.15976	0.342918	0.250932	373887/396104/395337/395245/396382/374148/396073/408251/420617/419106/395862/396381/395801/395575/415846/396431/395307/100858404/395231/395241/396397	21
BP	GO:0050776	regulation of immune response	4/88	49/2030	0.159986	0.342918	0.250932	554219/395971/419106/417489	4
BP	GO:0043067	regulation of programmed cell death	7/88	104/2030	0.160445	0.343218	0.251151	396197/395337/374148/396073/419106/395818/100858404	7
BP	GO:0071363	cellular response to growth factor stimulus	6/88	86/2030	0.165635	0.346648	0.253661	373887/395214/374148/428857/419106/396543	6
BP	GO:0001755	neural crest cell migration	2/88	17/2030	0.166123	0.346648	0.253661	396035/374148	2
BP	GO:0001818	negative regulation of cytokine production	2/88	17/2030	0.166123	0.346648	0.253661	396536/419106	2
BP	GO:0002768	immune response-regulating cell surface receptor signaling pathway	2/88	17/2030	0.166123	0.346648	0.253661	419106/417489	2
BP	GO:0007259	receptor signaling pathway via JAK-STAT	2/88	17/2030	0.166123	0.346648	0.253661	554219/395337	2
BP	GO:0030218	erythrocyte differentiation	2/88	17/2030	0.166123	0.346648	0.253661	419106/100858404	2
BP	GO:0034101	erythrocyte homeostasis	2/88	17/2030	0.166123	0.346648	0.253661	419106/100858404	2
BP	GO:0046474	glycerophospholipid biosynthetic process	2/88	17/2030	0.166123	0.346648	0.253661	396536/428583	2
BP	GO:0050830	defense response to Gram-positive bacterium	2/88	17/2030	0.166123	0.346648	0.253661	100858343/396218	2
BP	GO:0050900	leukocyte migration	2/88	17/2030	0.166123	0.346648	0.253661	395551/419106	2
BP	GO:0051147	regulation of muscle cell differentiation	2/88	17/2030	0.166123	0.346648	0.253661	396073/395241	2
BP	GO:0097696	receptor signaling pathway via STAT	2/88	17/2030	0.166123	0.346648	0.253661	554219/395337	2
BP	GO:0006351	DNA-templated transcription	20/88	371/2030	0.166881	0.346648	0.253661	373887/396104/395337/395245/396382/374148/396073/408251/419106/395862/396381/395801/395575/415846/396431/395307/100858404/395231/395241/396397	20
BP	GO:0032774	RNA biosynthetic process	20/88	371/2030	0.166881	0.346648	0.253661	373887/396104/395337/395245/396382/374148/396073/408251/419106/395862/396381/395801/395575/415846/396431/395307/100858404/395231/395241/396397	20
BP	GO:0097659	nucleic acid-templated transcription	20/88	371/2030	0.166881	0.346648	0.253661	373887/396104/395337/395245/396382/374148/396073/408251/419106/395862/396381/395801/395575/415846/396431/395307/100858404/395231/395241/396397	20
BP	GO:0042692	muscle cell differentiation	4/88	50/2030	0.168476	0.349287	0.255593	374148/396073/396236/395241	4
BP	GO:0010942	positive regulation of cell death	3/88	33/2030	0.169505	0.350072	0.256167	395337/395818/100858404	3
BP	GO:0043068	positive regulation of programmed cell death	3/88	33/2030	0.169505	0.350072	0.256167	395337/395818/100858404	3
BP	GO:0070887	cellular response to chemical stimulus	11/88	185/2030	0.171745	0.354018	0.259054	423504/396536/554219/373887/395551/395337/374148/419106/395575/396431/771113	11
BP	GO:0043066	negative regulation of apoptotic process	5/88	69/2030	0.176328	0.36277	0.265458	396197/395337/374148/396073/419106	5
BP	GO:0010941	regulation of cell death	7/88	107/2030	0.177782	0.365064	0.267137	396197/395337/374148/396073/419106/395818/100858404	7
BP	GO:0003012	muscle system process	3/88	34/2030	0.180423	0.367859	0.269183	395971/396073/396236	3
BP	GO:0071773	cellular response to BMP stimulus	3/88	34/2030	0.180423	0.367859	0.269183	395214/374148/419106	3
BP	GO:0002520	immune system development	2/88	18/2030	0.181878	0.367859	0.269183	396073/419106	2
BP	GO:0010959	regulation of metal ion transport	2/88	18/2030	0.181878	0.367859	0.269183	396073/771113	2
BP	GO:0016485	protein processing	2/88	18/2030	0.181878	0.367859	0.269183	395801/395266	2
BP	GO:0042472	inner ear morphogenesis	2/88	18/2030	0.181878	0.367859	0.269183	374148/419106	2
BP	GO:0050731	positive regulation of peptidyl-tyrosine phosphorylation	2/88	18/2030	0.181878	0.367859	0.269183	419184/395337	2
BP	GO:0090497	mesenchymal cell migration	2/88	18/2030	0.181878	0.367859	0.269183	396035/374148	2
BP	GO:0009968	negative regulation of signal transduction	6/88	89/2030	0.185152	0.373778	0.273514	396536/396023/374148/396073/419106/378901	6
BP	GO:0014070	response to organic cyclic compound	4/88	52/2030	0.185924	0.374633	0.27414	423504/554219/395337/395575	4
BP	GO:0031326	regulation of cellular biosynthetic process	22/88	420/2030	0.186309	0.374707	0.274194	373887/395971/396104/395337/395245/396382/374148/396073/408251/420617/419106/395862/396381/395801/395575/415846/396431/395307/100858404/395231/395241/396397	22
BP	GO:0043069	negative regulation of programmed cell death	5/88	71/2030	0.191364	0.383059	0.280305	396197/395337/374148/396073/419106	5
BP	GO:0007517	muscle organ development	3/88	35/2030	0.191529	0.383059	0.280305	419184/396073/396236	3
BP	GO:0044089	positive regulation of cellular component biogenesis	3/88	35/2030	0.191529	0.383059	0.280305	396536/374148/395241	3
BP	GO:0045859	regulation of protein kinase activity	4/88	53/2030	0.194865	0.389008	0.284658	419184/373887/417319/408251	4
BP	GO:0048585	negative regulation of response to stimulus	7/88	110/2030	0.1959	0.389184	0.284787	396536/396023/395214/374148/396073/419106/378901	7
BP	GO:0051172	negative regulation of nitrogen compound metabolic process	12/88	211/2030	0.196494	0.389184	0.284787	396104/395337/395245/374148/396073/420617/419106/396381/415846/396431/395241/396397	12
BP	GO:0010810	regulation of cell-substrate adhesion	2/88	19/2030	0.197847	0.389184	0.284787	396536/373887	2
BP	GO:0042471	ear morphogenesis	2/88	19/2030	0.197847	0.389184	0.284787	374148/419106	2
BP	GO:0045017	glycerolipid biosynthetic process	2/88	19/2030	0.197847	0.389184	0.284787	396536/428583	2
BP	GO:0060627	regulation of vesicle-mediated transport	2/88	19/2030	0.197847	0.389184	0.284787	396536/395971	2
BP	GO:0070663	regulation of leukocyte proliferation	2/88	19/2030	0.197847	0.389184	0.284787	395337/395801	2
BP	GO:0072659	protein localization to plasma membrane	2/88	19/2030	0.197847	0.389184	0.284787	419184/771113	2
BP	GO:0006812	monoatomic cation transport	6/88	91/2030	0.198656	0.390062	0.28543	395895/396328/396073/414871/426883/771113	6
BP	GO:0009889	regulation of biosynthetic process	22/88	424/2030	0.19939	0.39079	0.285963	373887/395971/396104/395337/395245/396382/374148/396073/408251/420617/419106/395862/396381/395801/395575/415846/396431/395307/100858404/395231/395241/396397	22
BP	GO:0019219	regulation of nucleobase-containing compound metabolic process	22/88	425/2030	0.202735	0.395327	0.289282	373887/395971/396104/395337/395245/396382/374148/396073/408251/420617/419106/395862/396381/395801/395575/415846/396431/395307/100858404/395231/395241/396397	22
BP	GO:0006869	lipid transport	3/88	36/2030	0.202807	0.395327	0.289282	396536/373887/374211	3
BP	GO:0051259	protein complex oligomerization	3/88	36/2030	0.202807	0.395327	0.289282	396328/395844/426883	3
BP	GO:0044255	cellular lipid metabolic process	5/88	73/2030	0.206848	0.401025	0.293452	396536/428583/374148/374211/395844	5
BP	GO:0051130	positive regulation of cellular component organization	5/88	73/2030	0.206848	0.401025	0.293452	396536/373887/395337/374148/395241	5
BP	GO:0098662	inorganic cation transmembrane transport	5/88	73/2030	0.206848	0.401025	0.293452	395895/396328/414871/426883/771113	5
BP	GO:0010556	regulation of macromolecule biosynthetic process	21/88	406/2030	0.21196	0.406563	0.297504	373887/396104/395337/395245/396382/374148/396073/408251/420617/419106/395862/396381/395801/395575/415846/396431/395307/100858404/395231/395241/396397	21
BP	GO:0080134	regulation of response to stress	6/88	93/2030	0.212524	0.406563	0.297504	396536/554219/395971/395337/395214/419106	6
BP	GO:0002088	lens development in camera-type eye	2/88	20/2030	0.213983	0.406563	0.297504	396056/419106	2
BP	GO:0002790	peptide secretion	2/88	20/2030	0.213983	0.406563	0.297504	395337/408251	2
BP	GO:0009266	response to temperature stimulus	2/88	20/2030	0.213983	0.406563	0.297504	423504/395337	2
BP	GO:0010927	cellular component assembly involved in morphogenesis	2/88	20/2030	0.213983	0.406563	0.297504	396073/395801	2
BP	GO:0015833	peptide transport	2/88	20/2030	0.213983	0.406563	0.297504	395337/408251	2
BP	GO:0022604	regulation of cell morphogenesis	2/88	20/2030	0.213983	0.406563	0.297504	373887/395801	2
BP	GO:0030072	peptide hormone secretion	2/88	20/2030	0.213983	0.406563	0.297504	395337/408251	2
BP	GO:0050821	protein stabilization	2/88	20/2030	0.213983	0.406563	0.297504	396536/771113	2
BP	GO:0071805	potassium ion transmembrane transport	2/88	20/2030	0.213983	0.406563	0.297504	396328/414871	2
BP	GO:0010876	lipid localization	3/88	37/2030	0.214239	0.406563	0.297504	396536/373887/374211	3
BP	GO:0060548	negative regulation of cell death	5/88	74/2030	0.214746	0.406808	0.297684	396197/395337/374148/396073/419106	5
BP	GO:0051128	regulation of cellular component organization	10/88	175/2030	0.221888	0.419599	0.307043	396536/373887/395337/396035/395214/374148/419106/395801/419263/395241	10
BP	GO:0048863	stem cell differentiation	3/88	38/2030	0.225809	0.426264	0.311921	396035/374148/396073	3
BP	GO:0006887	exocytosis	2/88	21/2030	0.230241	0.427136	0.312559	395971/417489	2
BP	GO:0006979	response to oxidative stress	2/88	21/2030	0.230241	0.427136	0.312559	396287/395337	2
BP	GO:0007160	cell-matrix adhesion	2/88	21/2030	0.230241	0.427136	0.312559	395686/373926	2
BP	GO:0007519	skeletal muscle tissue development	2/88	21/2030	0.230241	0.427136	0.312559	419184/396236	2
BP	GO:0008654	phospholipid biosynthetic process	2/88	21/2030	0.230241	0.427136	0.312559	396536/428583	2
BP	GO:0014032	neural crest cell development	2/88	21/2030	0.230241	0.427136	0.312559	396035/374148	2
BP	GO:0031668	cellular response to extracellular stimulus	2/88	21/2030	0.230241	0.427136	0.312559	395971/396197	2
BP	GO:0042063	gliogenesis	2/88	21/2030	0.230241	0.427136	0.312559	395337/374148	2
BP	GO:0050730	regulation of peptidyl-tyrosine phosphorylation	2/88	21/2030	0.230241	0.427136	0.312559	419184/395337	2
BP	GO:0051056	regulation of small GTPase mediated signal transduction	2/88	21/2030	0.230241	0.427136	0.312559	396536/427841	2
BP	GO:0098655	monoatomic cation transmembrane transport	5/88	76/2030	0.230828	0.427489	0.312817	395895/396328/414871/426883/771113	5
BP	GO:1903530	regulation of secretion by cell	3/88	39/2030	0.2375	0.43909	0.321306	395971/395337/408251	3
BP	GO:0035556	intracellular signal transduction	12/88	220/2030	0.238697	0.440352	0.32223	396536/373887/395971/395551/395337/417319/374148/408251/427841/419106/395801/417489	12
BP	GO:0098660	inorganic ion transmembrane transport	5/88	77/2030	0.239002	0.440352	0.32223	395895/396328/414871/426883/771113	5
BP	GO:0010648	negative regulation of cell communication	6/88	97/2030	0.241244	0.442968	0.324144	396536/396023/374148/396073/419106/378901	6
BP	GO:0023057	negative regulation of signaling	6/88	97/2030	0.241244	0.442968	0.324144	396536/396023/374148/396073/419106/378901	6
BP	GO:0006813	potassium ion transport	2/88	22/2030	0.246581	0.449696	0.329068	396328/414871	2
BP	GO:0014033	neural crest cell differentiation	2/88	22/2030	0.246581	0.449696	0.329068	396035/374148	2
BP	GO:0048864	stem cell development	2/88	22/2030	0.246581	0.449696	0.329068	396035/374148	2
BP	GO:0051098	regulation of binding	2/88	22/2030	0.246581	0.449696	0.329068	419106/395241	2
BP	GO:0030335	positive regulation of cell migration	3/88	40/2030	0.249297	0.453115	0.331569	373887/374148/419106	3
BP	GO:0051046	regulation of secretion	3/88	40/2030	0.249297	0.453115	0.331569	395971/395337/408251	3
BP	GO:0022414	reproductive process	5/88	79/2030	0.255588	0.462984	0.338791	373887/374148/419106/396381/395801	5
BP	GO:0051338	regulation of transferase activity	5/88	79/2030	0.255588	0.462984	0.338791	419184/396536/373887/417319/408251	5
BP	GO:0034654	nucleobase-containing compound biosynthetic process	21/88	418/2030	0.25609	0.463114	0.338886	373887/395971/396104/395337/395245/396382/374148/396073/408251/419106/395862/396381/395801/395575/415846/396431/395307/100858404/395231/395241/396397	21
BP	GO:0051246	regulation of protein metabolic process	12/88	224/2030	0.258559	0.466794	0.341579	419184/396536/554219/373887/395337/417319/374148/408251/420617/428857/419106/395818	12
BP	GO:0042886	amide transport	2/88	23/2030	0.262966	0.473163	0.346239	395337/408251	2
BP	GO:0060538	skeletal muscle organ development	2/88	23/2030	0.262966	0.473163	0.346239	419184/396236	2
BP	GO:0071495	cellular response to endogenous stimulus	8/88	141/2030	0.2639	0.474052	0.34689	373887/395214/374148/428857/419106/395575/396431/396543	8
BP	GO:2000147	positive regulation of cell motility	3/88	42/2030	0.273149	0.489846	0.358448	373887/374148/419106	3
BP	GO:0006468	protein phosphorylation	9/88	164/2030	0.277135	0.494397	0.361777	419184/396536/554219/373887/395337/417319/374148/408251/428857	9
BP	GO:0006650	glycerophospholipid metabolic process	2/88	24/2030	0.279362	0.494397	0.361777	396536/428583	2
BP	GO:0018105	peptidyl-serine phosphorylation	2/88	24/2030	0.279362	0.494397	0.361777	554219/395337	2
BP	GO:0018209	peptidyl-serine modification	2/88	24/2030	0.279362	0.494397	0.361777	554219/395337	2
BP	GO:0031032	actomyosin structure organization	2/88	24/2030	0.279362	0.494397	0.361777	396536/396073	2
BP	GO:0046883	regulation of hormone secretion	2/88	24/2030	0.279362	0.494397	0.361777	395337/408251	2
BP	GO:0048839	inner ear development	2/88	24/2030	0.279362	0.494397	0.361777	374148/419106	2
BP	GO:0070372	regulation of ERK1 and ERK2 cascade	2/88	24/2030	0.279362	0.494397	0.361777	395551/408251	2
BP	GO:0000003	reproduction	5/88	82/2030	0.280987	0.494831	0.362095	373887/374148/419106/396381/395801	5
BP	GO:0007169	transmembrane receptor protein tyrosine kinase signaling pathway	5/88	82/2030	0.280987	0.494831	0.362095	373887/374148/428857/419106/396543	5
BP	GO:0098542	defense response to other organism	5/88	82/2030	0.280987	0.494831	0.362095	554219/395551/395337/100858343/396218	5
BP	GO:0040017	positive regulation of locomotion	3/88	43/2030	0.285173	0.501383	0.366889	373887/374148/419106	3
BP	GO:0012501	programmed cell death	8/88	145/2030	0.289651	0.508425	0.372043	396329/396197/395337/374148/396073/419106/395818/100858404	8
BP	GO:0051047	positive regulation of secretion	2/88	25/2030	0.295737	0.517419	0.378624	395971/408251	2
BP	GO:1903532	positive regulation of secretion by cell	2/88	25/2030	0.295737	0.517419	0.378624	395971/408251	2
BP	GO:0010605	negative regulation of macromolecule metabolic process	13/88	253/2030	0.296847	0.518518	0.379428	396536/396104/395337/395245/374148/396073/420617/419106/396381/415846/396431/395241/396397	13
BP	GO:0031647	regulation of protein stability	2/88	26/2030	0.312063	0.541647	0.396353	396536/771113	2
BP	GO:0043583	ear development	2/88	26/2030	0.312063	0.541647	0.396353	374148/419106	2
BP	GO:1990778	protein localization to cell periphery	2/88	26/2030	0.312063	0.541647	0.396353	419184/771113	2
BP	GO:0018130	heterocycle biosynthetic process	21/88	432/2030	0.312101	0.541647	0.396353	373887/395971/396104/395337/395245/396382/374148/396073/408251/419106/395862/396381/395801/395575/415846/396431/395307/100858404/395231/395241/396397	21
BP	GO:0006629	lipid metabolic process	6/88	107/2030	0.317444	0.550032	0.402489	396536/428583/374148/374211/395844/419070	6
BP	GO:0009617	response to bacterium	3/88	46/2030	0.321475	0.554338	0.40564	395337/100858343/396218	3
BP	GO:0032504	multicellular organism reproduction	3/88	46/2030	0.321475	0.554338	0.40564	373887/374148/395801	3
BP	GO:0048609	multicellular organismal reproductive process	3/88	46/2030	0.321475	0.554338	0.40564	373887/374148/395801	3
BP	GO:0008219	cell death	8/88	150/2030	0.32272	0.555594	0.406559	396329/396197/395337/374148/396073/419106/395818/100858404	8
BP	GO:0010629	negative regulation of gene expression	5/88	87/2030	0.324357	0.557103	0.407663	396536/395337/374148/420617/419106	5
BP	GO:0019438	aromatic compound biosynthetic process	21/88	435/2030	0.324631	0.557103	0.407663	373887/395971/396104/395337/395245/396382/374148/396073/408251/419106/395862/396381/395801/395575/415846/396431/395307/100858404/395231/395241/396397	21
BP	GO:0006644	phospholipid metabolic process	2/88	27/2030	0.328313	0.55808	0.408378	396536/428583	2
BP	GO:0007610	behavior	2/88	27/2030	0.328313	0.55808	0.408378	373887/418125	2
BP	GO:0009306	protein secretion	2/88	27/2030	0.328313	0.55808	0.408378	395337/408251	2
BP	GO:0035592	establishment of protein localization to extracellular region	2/88	27/2030	0.328313	0.55808	0.408378	395337/408251	2
BP	GO:0048588	developmental cell growth	2/88	27/2030	0.328313	0.55808	0.408378	374148/395801	2
BP	GO:0071900	regulation of protein serine/threonine kinase activity	2/88	27/2030	0.328313	0.55808	0.408378	373887/417319	2
BP	GO:0022412	cellular process involved in reproduction in multicellular organism	2/88	28/2030	0.344464	0.576844	0.422109	373887/395801	2
BP	GO:0046486	glycerolipid metabolic process	2/88	28/2030	0.344464	0.576844	0.422109	396536/428583	2
BP	GO:0071692	protein localization to extracellular region	2/88	28/2030	0.344464	0.576844	0.422109	395337/408251	2
BP	GO:1901701	cellular response to oxygen-containing compound	4/88	69/2030	0.350471	0.576844	0.422109	395337/374148/395575/771113	4
BP	GO:0009892	negative regulation of metabolic process	13/88	264/2030	0.354185	0.576844	0.422109	396536/396104/395337/395245/374148/396073/420617/419106/396381/415846/396431/395241/396397	13
BP	GO:0044270	cellular nitrogen compound catabolic process	3/88	49/2030	0.357853	0.576844	0.422109	396287/395337/420617	3
BP	GO:0046700	heterocycle catabolic process	3/88	49/2030	0.357853	0.576844	0.422109	396287/395337/420617	3
BP	GO:0002011	morphogenesis of an epithelial sheet	1/88	10/2030	0.358651	0.576844	0.422109	419184	1
BP	GO:0002244	hematopoietic progenitor cell differentiation	1/88	10/2030	0.358651	0.576844	0.422109	419106	1
BP	GO:0002449	lymphocyte mediated immunity	1/88	10/2030	0.358651	0.576844	0.422109	419106	1
BP	GO:0007173	epidermal growth factor receptor signaling pathway	1/88	10/2030	0.358651	0.576844	0.422109	374148	1
BP	GO:0007272	ensheathment of neurons	1/88	10/2030	0.358651	0.576844	0.422109	419824	1
BP	GO:0008038	neuron recognition	1/88	10/2030	0.358651	0.576844	0.422109	419824	1
BP	GO:0008366	axon ensheathment	1/88	10/2030	0.358651	0.576844	0.422109	419824	1
BP	GO:0009612	response to mechanical stimulus	1/88	10/2030	0.358651	0.576844	0.422109	374148	1
BP	GO:0009913	epidermal cell differentiation	1/88	10/2030	0.358651	0.576844	0.422109	419106	1
BP	GO:0010811	positive regulation of cell-substrate adhesion	1/88	10/2030	0.358651	0.576844	0.422109	396536	1
BP	GO:0016441	post-transcriptional gene silencing	1/88	10/2030	0.358651	0.576844	0.422109	395337	1
BP	GO:0021545	cranial nerve development	1/88	10/2030	0.358651	0.576844	0.422109	396035	1
BP	GO:0022898	regulation of transmembrane transporter activity	1/88	10/2030	0.358651	0.576844	0.422109	771113	1
BP	GO:0034614	cellular response to reactive oxygen species	1/88	10/2030	0.358651	0.576844	0.422109	395337	1
BP	GO:0034620	cellular response to unfolded protein	1/88	10/2030	0.358651	0.576844	0.422109	423504	1
BP	GO:0042180	cellular ketone metabolic process	1/88	10/2030	0.358651	0.576844	0.422109	374148	1
BP	GO:0042440	pigment metabolic process	1/88	10/2030	0.358651	0.576844	0.422109	396287	1
BP	GO:0042552	myelination	1/88	10/2030	0.358651	0.576844	0.422109	419824	1
BP	GO:0046425	regulation of receptor signaling pathway via JAK-STAT	1/88	10/2030	0.358651	0.576844	0.422109	554219	1
BP	GO:0046467	membrane lipid biosynthetic process	1/88	10/2030	0.358651	0.576844	0.422109	428583	1
BP	GO:0048477	oogenesis	1/88	10/2030	0.358651	0.576844	0.422109	395801	1
BP	GO:0048771	tissue remodeling	1/88	10/2030	0.358651	0.576844	0.422109	395801	1
BP	GO:0048813	dendrite morphogenesis	1/88	10/2030	0.358651	0.576844	0.422109	396035	1
BP	GO:0050864	regulation of B cell activation	1/88	10/2030	0.358651	0.576844	0.422109	395337	1
BP	GO:0050871	positive regulation of B cell activation	1/88	10/2030	0.358651	0.576844	0.422109	395337	1
BP	GO:0050919	negative chemotaxis	1/88	10/2030	0.358651	0.576844	0.422109	396536	1
BP	GO:0051155	positive regulation of striated muscle cell differentiation	1/88	10/2030	0.358651	0.576844	0.422109	395241	1
BP	GO:1901890	positive regulation of cell junction assembly	1/88	10/2030	0.358651	0.576844	0.422109	395241	1
BP	GO:2000177	regulation of neural precursor cell proliferation	1/88	10/2030	0.358651	0.576844	0.422109	396381	1
BP	GO:0050767	regulation of neurogenesis	2/88	29/2030	0.360493	0.578078	0.423012	396213/395337	2
BP	GO:0051235	maintenance of location	2/88	29/2030	0.360493	0.578078	0.423012	396536/396197	2
BP	GO:0048878	chemical homeostasis	5/88	92/2030	0.368478	0.589196	0.431147	396536/396287/395337/396256/395594	5
BP	GO:0019439	aromatic compound catabolic process	3/88	50/2030	0.369941	0.589196	0.431147	396287/395337/420617	3
BP	GO:0051129	negative regulation of cellular component organization	3/88	50/2030	0.369941	0.589196	0.431147	396536/395214/374148	3
BP	GO:1901361	organic cyclic compound catabolic process	3/88	50/2030	0.369941	0.589196	0.431147	396287/395337/420617	3
BP	GO:0043549	regulation of kinase activity	4/88	71/2030	0.370675	0.589196	0.431147	419184/373887/417319/408251	4
BP	GO:0006936	muscle contraction	2/88	30/2030	0.376382	0.589196	0.431147	395971/396073	2
BP	GO:0016053	organic acid biosynthetic process	2/88	30/2030	0.376382	0.589196	0.431147	395844/100359387	2
BP	GO:0016311	dephosphorylation	2/88	30/2030	0.376382	0.589196	0.431147	395801/396317	2
BP	GO:0046394	carboxylic acid biosynthetic process	2/88	30/2030	0.376382	0.589196	0.431147	395844/100359387	2
BP	GO:0055001	muscle cell development	2/88	30/2030	0.376382	0.589196	0.431147	396073/396236	2
BP	GO:0009628	response to abiotic stimulus	5/88	93/2030	0.377339	0.589196	0.431147	423504/395337/374148/419106/426883	5
BP	GO:0009057	macromolecule catabolic process	6/88	115/2030	0.381004	0.589196	0.431147	396329/395337/374148/420617/395818/396218	6
BP	GO:0032787	monocarboxylic acid metabolic process	3/88	51/2030	0.381992	0.589196	0.431147	374148/374211/395844	3
BP	GO:0006986	response to unfolded protein	1/88	11/2030	0.386591	0.589196	0.431147	423504	1
BP	GO:0010830	regulation of myotube differentiation	1/88	11/2030	0.386591	0.589196	0.431147	396073	1
BP	GO:0015718	monocarboxylic acid transport	1/88	11/2030	0.386591	0.589196	0.431147	374211	1
BP	GO:0016571	histone methylation	1/88	11/2030	0.386591	0.589196	0.431147	419106	1
BP	GO:0018022	peptidyl-lysine methylation	1/88	11/2030	0.386591	0.589196	0.431147	419106	1
BP	GO:0030199	collagen fibril organization	1/88	11/2030	0.386591	0.589196	0.431147	415797	1
BP	GO:0030278	regulation of ossification	1/88	11/2030	0.386591	0.589196	0.431147	374148	1
BP	GO:0032409	regulation of transporter activity	1/88	11/2030	0.386591	0.589196	0.431147	771113	1
BP	GO:0035567	non-canonical Wnt signaling pathway	1/88	11/2030	0.386591	0.589196	0.431147	373887	1
BP	GO:0038127	ERBB signaling pathway	1/88	11/2030	0.386591	0.589196	0.431147	374148	1
BP	GO:0042100	B cell proliferation	1/88	11/2030	0.386591	0.589196	0.431147	554219	1
BP	GO:0044403	biological process involved in symbiotic interaction	1/88	11/2030	0.386591	0.589196	0.431147	100858343	1
BP	GO:0048640	negative regulation of developmental growth	1/88	11/2030	0.386591	0.589196	0.431147	395801	1
BP	GO:0050671	positive regulation of lymphocyte proliferation	1/88	11/2030	0.386591	0.589196	0.431147	395337	1
BP	GO:0050796	regulation of insulin secretion	1/88	11/2030	0.386591	0.589196	0.431147	395337	1
BP	GO:0051017	actin filament bundle assembly	1/88	11/2030	0.386591	0.589196	0.431147	396536	1
BP	GO:0051149	positive regulation of muscle cell differentiation	1/88	11/2030	0.386591	0.589196	0.431147	395241	1
BP	GO:0055072	iron ion homeostasis	1/88	11/2030	0.386591	0.589196	0.431147	396287	1
BP	GO:0060317	cardiac epithelial to mesenchymal transition	1/88	11/2030	0.386591	0.589196	0.431147	395594	1
BP	GO:0061572	actin filament bundle organization	1/88	11/2030	0.386591	0.589196	0.431147	396536	1
BP	GO:2000146	negative regulation of cell motility	1/88	11/2030	0.386591	0.589196	0.431147	419106	1
BP	GO:2001235	positive regulation of apoptotic signaling pathway	1/88	11/2030	0.386591	0.589196	0.431147	395818	1
BP	GO:0009896	positive regulation of catabolic process	2/88	31/2030	0.392111	0.594526	0.435047	395337/374148	2
BP	GO:0009991	response to extracellular stimulus	2/88	31/2030	0.392111	0.594526	0.435047	395971/396197	2
BP	GO:0065004	protein-DNA complex assembly	2/88	31/2030	0.392111	0.594526	0.435047	395207/374148	2
BP	GO:1901362	organic cyclic compound biosynthetic process	21/88	451/2030	0.393765	0.594526	0.435047	373887/395971/396104/395337/395245/396382/374148/396073/408251/419106/395862/396381/395801/395575/415846/396431/395307/100858404/395231/395241/396397	21
BP	GO:0008610	lipid biosynthetic process	3/88	52/2030	0.393996	0.594526	0.435047	396536/428583/395844	3
BP	GO:0040008	regulation of growth	3/88	52/2030	0.393996	0.594526	0.435047	396073/395801/395241	3
BP	GO:0006082	organic acid metabolic process	5/88	95/2030	0.395061	0.594526	0.435047	396221/374148/374211/395844/100359387	5
BP	GO:0019752	carboxylic acid metabolic process	5/88	95/2030	0.395061	0.594526	0.435047	396221/374148/374211/395844/100359387	5
BP	GO:0043436	oxoacid metabolic process	5/88	95/2030	0.395061	0.594526	0.435047	396221/374148/374211/395844/100359387	5
BP	GO:0006811	monoatomic ion transport	6/88	118/2030	0.405025	0.596166	0.436248	395895/396328/396073/414871/426883/771113	6
BP	GO:0006915	apoptotic process	7/88	140/2030	0.405085	0.596166	0.436248	396197/395337/374148/396073/419106/395818/100858404	7
BP	GO:0022607	cellular component assembly	14/88	296/2030	0.405843	0.596166	0.436248	396536/396328/395207/419222/374148/396073/415797/374007/395844/395801/426883/395241/373926/395594	14
BP	GO:0032880	regulation of protein localization	3/88	53/2030	0.405944	0.596166	0.436248	419184/395337/408251	3
BP	GO:0045087	innate immune response	3/88	53/2030	0.405944	0.596166	0.436248	554219/395551/100858343	3
BP	GO:0071824	protein-DNA complex subunit organization	2/88	32/2030	0.407666	0.596166	0.436248	395207/374148	2
BP	GO:0000302	response to reactive oxygen species	1/88	12/2030	0.413327	0.596166	0.436248	395337	1
BP	GO:0001935	endothelial cell proliferation	1/88	12/2030	0.413327	0.596166	0.436248	396536	1
BP	GO:0002218	activation of innate immune response	1/88	12/2030	0.413327	0.596166	0.436248	554219	1
BP	GO:0006352	DNA-templated transcription initiation	1/88	12/2030	0.413327	0.596166	0.436248	396073	1
BP	GO:0007229	integrin-mediated signaling pathway	1/88	12/2030	0.413327	0.596166	0.436248	396536	1
BP	GO:0007611	learning or memory	1/88	12/2030	0.413327	0.596166	0.436248	418125	1
BP	GO:0010921	regulation of phosphatase activity	1/88	12/2030	0.413327	0.596166	0.436248	395801	1
BP	GO:0016575	histone deacetylation	1/88	12/2030	0.413327	0.596166	0.436248	395241	1
BP	GO:0019827	stem cell population maintenance	1/88	12/2030	0.413327	0.596166	0.436248	374148	1
BP	GO:0030595	leukocyte chemotaxis	1/88	12/2030	0.413327	0.596166	0.436248	395551	1
BP	GO:0032946	positive regulation of mononuclear cell proliferation	1/88	12/2030	0.413327	0.596166	0.436248	395337	1
BP	GO:0034508	centromere complex assembly	1/88	12/2030	0.413327	0.596166	0.436248	395207	1
BP	GO:0035051	cardiocyte differentiation	1/88	12/2030	0.413327	0.596166	0.436248	396073	1
BP	GO:0043588	skin development	1/88	12/2030	0.413327	0.596166	0.436248	418125	1
BP	GO:0045665	negative regulation of neuron differentiation	1/88	12/2030	0.413327	0.596166	0.436248	374148	1
BP	GO:0045727	positive regulation of translation	1/88	12/2030	0.413327	0.596166	0.436248	395337	1
BP	GO:0045732	positive regulation of protein catabolic process	1/88	12/2030	0.413327	0.596166	0.436248	374148	1
BP	GO:0046488	phosphatidylinositol metabolic process	1/88	12/2030	0.413327	0.596166	0.436248	428583	1
BP	GO:0051099	positive regulation of binding	1/88	12/2030	0.413327	0.596166	0.436248	419106	1
BP	GO:0055088	lipid homeostasis	1/88	12/2030	0.413327	0.596166	0.436248	396536	1
BP	GO:0061077	chaperone-mediated protein folding	1/88	12/2030	0.413327	0.596166	0.436248	423504	1
BP	GO:0090288	negative regulation of cellular response to growth factor stimulus	1/88	12/2030	0.413327	0.596166	0.436248	419106	1
BP	GO:0097529	myeloid leukocyte migration	1/88	12/2030	0.413327	0.596166	0.436248	395551	1
BP	GO:0098727	maintenance of cell number	1/88	12/2030	0.413327	0.596166	0.436248	374148	1
BP	GO:0120254	olefinic compound metabolic process	1/88	12/2030	0.413327	0.596166	0.436248	395844	1
BP	GO:0051640	organelle localization	3/88	54/2030	0.417826	0.601849	0.440406	395971/396197/417489	3
BP	GO:0006457	protein folding	2/88	33/2030	0.423031	0.608531	0.445295	423504/373914	2
BP	GO:0043933	protein-containing complex organization	9/88	188/2030	0.429446	0.616383	0.451041	396536/396328/395207/374148/395844/419263/426883/395241/373926	9
BP	GO:0031344	regulation of cell projection organization	3/88	55/2030	0.429635	0.616383	0.451041	373887/395214/419106	3
BP	GO:0097435	supramolecular fiber organization	5/88	99/2030	0.430385	0.616538	0.451154	396473/396536/396073/415797/419263	5
BP	GO:0006950	response to stress	15/88	324/2030	0.434228	0.616538	0.451154	423504/419184/396536/554219/396287/395971/395551/396197/395337/395214/100858343/374007/419106/396218/373926	15
BP	GO:0006334	nucleosome assembly	1/88	13/2030	0.438911	0.616538	0.451154	374148	1
BP	GO:0006473	protein acetylation	1/88	13/2030	0.438911	0.616538	0.451154	419106	1
BP	GO:0006476	protein deacetylation	1/88	13/2030	0.438911	0.616538	0.451154	395241	1
BP	GO:0006643	membrane lipid metabolic process	1/88	13/2030	0.438911	0.616538	0.451154	428583	1
BP	GO:0007224	smoothened signaling pathway	1/88	13/2030	0.438911	0.616538	0.451154	395801	1
BP	GO:0007266	Rho protein signal transduction	1/88	13/2030	0.438911	0.616538	0.451154	396536	1
BP	GO:0010977	negative regulation of neuron projection development	1/88	13/2030	0.438911	0.616538	0.451154	395214	1
BP	GO:0014068	positive regulation of phosphatidylinositol 3-kinase signaling	1/88	13/2030	0.438911	0.616538	0.451154	374148	1
BP	GO:0030177	positive regulation of Wnt signaling pathway	1/88	13/2030	0.438911	0.616538	0.451154	396104	1
BP	GO:0030183	B cell differentiation	1/88	13/2030	0.438911	0.616538	0.451154	554219	1
BP	GO:0031109	microtubule polymerization or depolymerization	1/88	13/2030	0.438911	0.616538	0.451154	419263	1
BP	GO:0032496	response to lipopolysaccharide	1/88	13/2030	0.438911	0.616538	0.451154	395337	1
BP	GO:0097553	calcium ion transmembrane import into cytosol	1/88	13/2030	0.438911	0.616538	0.451154	395895	1
BP	GO:1904062	regulation of monoatomic cation transmembrane transport	1/88	13/2030	0.438911	0.616538	0.451154	771113	1
BP	GO:0009894	regulation of catabolic process	3/88	57/2030	0.453	0.62718	0.458942	395337/374148/420617	3
BP	GO:0042742	defense response to bacterium	2/88	35/2030	0.453143	0.62718	0.458942	100858343/396218	2
BP	GO:0072657	protein localization to membrane	2/88	35/2030	0.453143	0.62718	0.458942	419184/771113	2
BP	GO:0034220	monoatomic ion transmembrane transport	5/88	102/2030	0.456643	0.62718	0.458942	395895/396328/414871/426883/771113	5
BP	GO:0007292	female gamete generation	1/88	14/2030	0.46339	0.62718	0.458942	395801	1
BP	GO:0008037	cell recognition	1/88	14/2030	0.46339	0.62718	0.458942	419824	1
BP	GO:0008203	cholesterol metabolic process	1/88	14/2030	0.46339	0.62718	0.458942	396536	1
BP	GO:0014066	regulation of phosphatidylinositol 3-kinase signaling	1/88	14/2030	0.46339	0.62718	0.458942	374148	1
BP	GO:0018958	phenol-containing compound metabolic process	1/88	14/2030	0.46339	0.62718	0.458942	419106	1
BP	GO:0031345	negative regulation of cell projection organization	1/88	14/2030	0.46339	0.62718	0.458942	395214	1
BP	GO:0031929	TOR signaling	1/88	14/2030	0.46339	0.62718	0.458942	419106	1
BP	GO:0031960	response to corticosteroid	1/88	14/2030	0.46339	0.62718	0.458942	395337	1
BP	GO:0033500	carbohydrate homeostasis	1/88	14/2030	0.46339	0.62718	0.458942	395337	1
BP	GO:0034250	positive regulation of amide metabolic process	1/88	14/2030	0.46339	0.62718	0.458942	395337	1
BP	GO:0034728	nucleosome organization	1/88	14/2030	0.46339	0.62718	0.458942	374148	1
BP	GO:0035967	cellular response to topologically incorrect protein	1/88	14/2030	0.46339	0.62718	0.458942	423504	1
BP	GO:0042593	glucose homeostasis	1/88	14/2030	0.46339	0.62718	0.458942	395337	1
BP	GO:0043543	protein acylation	1/88	14/2030	0.46339	0.62718	0.458942	419106	1
BP	GO:0044242	cellular lipid catabolic process	1/88	14/2030	0.46339	0.62718	0.458942	374211	1
BP	GO:0045089	positive regulation of innate immune response	1/88	14/2030	0.46339	0.62718	0.458942	554219	1
BP	GO:0045765	regulation of angiogenesis	1/88	14/2030	0.46339	0.62718	0.458942	100858404	1
BP	GO:0048639	positive regulation of developmental growth	1/88	14/2030	0.46339	0.62718	0.458942	395241	1
BP	GO:0051384	response to glucocorticoid	1/88	14/2030	0.46339	0.62718	0.458942	395337	1
BP	GO:0061351	neural precursor cell proliferation	1/88	14/2030	0.46339	0.62718	0.458942	396381	1
BP	GO:0070665	positive regulation of leukocyte proliferation	1/88	14/2030	0.46339	0.62718	0.458942	395337	1
BP	GO:0072330	monocarboxylic acid biosynthetic process	1/88	14/2030	0.46339	0.62718	0.458942	395844	1
BP	GO:0072593	reactive oxygen species metabolic process	1/88	14/2030	0.46339	0.62718	0.458942	554219	1
BP	GO:1901342	regulation of vasculature development	1/88	14/2030	0.46339	0.62718	0.458942	100858404	1
BP	GO:1902652	secondary alcohol metabolic process	1/88	14/2030	0.46339	0.62718	0.458942	396536	1
BP	GO:1901615	organic hydroxy compound metabolic process	3/88	58/2030	0.464541	0.627947	0.459503	396536/419106/395844	3
BP	GO:0006066	alcohol metabolic process	2/88	36/2030	0.467869	0.630861	0.461635	396536/395844	2
BP	GO:0051960	regulation of nervous system development	2/88	36/2030	0.467869	0.630861	0.461635	396213/395337	2
BP	GO:0007264	small GTPase mediated signal transduction	2/88	37/2030	0.482362	0.64114	0.469158	396536/427841	2
BP	GO:0007167	enzyme-linked receptor protein signaling pathway	6/88	128/2030	0.484358	0.64114	0.469158	373887/395214/374148/428857/419106/396543	6
BP	GO:0002237	response to molecule of bacterial origin	1/88	15/2030	0.486814	0.64114	0.469158	395337	1
BP	GO:0002833	positive regulation of response to biotic stimulus	1/88	15/2030	0.486814	0.64114	0.469158	554219	1
BP	GO:0006941	striated muscle contraction	1/88	15/2030	0.486814	0.64114	0.469158	396073	1
BP	GO:0008544	epidermis development	1/88	15/2030	0.486814	0.64114	0.469158	419106	1
BP	GO:0008585	female gonad development	1/88	15/2030	0.486814	0.64114	0.469158	373887	1
BP	GO:0010952	positive regulation of peptidase activity	1/88	15/2030	0.486814	0.64114	0.469158	395818	1
BP	GO:0021675	nerve development	1/88	15/2030	0.486814	0.64114	0.469158	396035	1
BP	GO:0030239	myofibril assembly	1/88	15/2030	0.486814	0.64114	0.469158	396073	1
BP	GO:0034599	cellular response to oxidative stress	1/88	15/2030	0.486814	0.64114	0.469158	395337	1
BP	GO:0035303	regulation of dephosphorylation	1/88	15/2030	0.486814	0.64114	0.469158	395801	1
BP	GO:0035966	response to topologically incorrect protein	1/88	15/2030	0.486814	0.64114	0.469158	423504	1
BP	GO:0046545	development of primary female sexual characteristics	1/88	15/2030	0.486814	0.64114	0.469158	373887	1
BP	GO:0046578	regulation of Ras protein signal transduction	1/88	15/2030	0.486814	0.64114	0.469158	396536	1
BP	GO:0046887	positive regulation of hormone secretion	1/88	15/2030	0.486814	0.64114	0.469158	408251	1
BP	GO:0055002	striated muscle cell development	1/88	15/2030	0.486814	0.64114	0.469158	396073	1
BP	GO:0070507	regulation of microtubule cytoskeleton organization	1/88	15/2030	0.486814	0.64114	0.469158	419263	1
BP	GO:1902905	positive regulation of supramolecular fiber organization	1/88	15/2030	0.486814	0.64114	0.469158	396536	1
BP	GO:0010975	regulation of neuron projection development	2/88	38/2030	0.496615	0.653249	0.478018	395214/419106	2
BP	GO:0061024	membrane organization	3/88	61/2030	0.498522	0.654957	0.479268	396536/396202/419825	3
BP	GO:0018193	peptidyl-amino acid modification	6/88	130/2030	0.499915	0.655642	0.479769	419184/396536/554219/395337/414143/419106	6
BP	GO:0006796	phosphate-containing compound metabolic process	13/88	291/2030	0.500607	0.655642	0.479769	419184/396536/554219/373887/395971/428583/395337/417319/374148/408251/428857/395801/396317	13
BP	GO:0006793	phosphorus metabolic process	13/88	292/2030	0.505999	0.655642	0.479769	419184/396536/554219/373887/395971/428583/395337/417319/374148/408251/428857/395801/396317	13
BP	GO:0002377	immunoglobulin production	1/88	16/2030	0.509226	0.655642	0.479769	395337	1
BP	GO:0006909	phagocytosis	1/88	16/2030	0.509226	0.655642	0.479769	396536	1
BP	GO:0010721	negative regulation of cell development	1/88	16/2030	0.509226	0.655642	0.479769	395801	1
BP	GO:0015849	organic acid transport	1/88	16/2030	0.509226	0.655642	0.479769	374211	1
BP	GO:0035601	protein deacylation	1/88	16/2030	0.509226	0.655642	0.479769	395241	1
BP	GO:0046942	carboxylic acid transport	1/88	16/2030	0.509226	0.655642	0.479769	374211	1
BP	GO:0048738	cardiac muscle tissue development	1/88	16/2030	0.509226	0.655642	0.479769	396073	1
BP	GO:0050890	cognition	1/88	16/2030	0.509226	0.655642	0.479769	418125	1
BP	GO:0051054	positive regulation of DNA metabolic process	1/88	16/2030	0.509226	0.655642	0.479769	395337	1
BP	GO:0051495	positive regulation of cytoskeleton organization	1/88	16/2030	0.509226	0.655642	0.479769	396536	1
BP	GO:2000241	regulation of reproductive process	1/88	16/2030	0.509226	0.655642	0.479769	374148	1
BP	GO:0034660	ncRNA metabolic process	3/88	62/2030	0.509615	0.655642	0.479769	395337/374148/419106	3
BP	GO:1901698	response to nitrogen compound	3/88	62/2030	0.509615	0.655642	0.479769	423504/554219/374148	3
BP	GO:0016070	RNA metabolic process	21/88	477/2030	0.509892	0.655642	0.479769	373887/396104/395337/395245/396382/374148/396073/408251/420617/419106/395862/396381/395801/395575/415846/396431/395307/100858404/395231/395241/396397	21
BP	GO:0007276	gamete generation	2/88	39/2030	0.510621	0.655642	0.479769	374148/395801	2
BP	GO:0032870	cellular response to hormone stimulus	2/88	39/2030	0.510621	0.655642	0.479769	395575/396431	2
BP	GO:0060341	regulation of cellular localization	3/88	63/2030	0.520584	0.661646	0.484163	419184/395337/408251	3
BP	GO:0051052	regulation of DNA metabolic process	2/88	40/2030	0.524375	0.661646	0.484163	395337/419106	2
BP	GO:0051146	striated muscle cell differentiation	2/88	40/2030	0.524375	0.661646	0.484163	396073/395241	2
BP	GO:0016310	phosphorylation	9/88	203/2030	0.525614	0.661646	0.484163	419184/396536/554219/373887/395337/417319/374148/408251/428857	9
BP	GO:0051179	localization	21/88	481/2030	0.527661	0.661646	0.484163	423504/419184/396536/373887/395971/395895/396328/396197/395337/396035/374148/396073/408251/420617/419106/374211/414871/426883/771113/417489/395594	21
BP	GO:0006479	protein methylation	1/88	17/2030	0.53067	0.661646	0.484163	419106	1
BP	GO:0008213	protein alkylation	1/88	17/2030	0.53067	0.661646	0.484163	419106	1
BP	GO:0009408	response to heat	1/88	17/2030	0.53067	0.661646	0.484163	423504	1
BP	GO:0010001	glial cell differentiation	1/88	17/2030	0.53067	0.661646	0.484163	374148	1
BP	GO:0010212	response to ionizing radiation	1/88	17/2030	0.53067	0.661646	0.484163	419106	1
BP	GO:0014706	striated muscle tissue development	1/88	17/2030	0.53067	0.661646	0.484163	396073	1
BP	GO:0015850	organic hydroxy compound transport	1/88	17/2030	0.53067	0.661646	0.484163	396536	1
BP	GO:0016125	sterol metabolic process	1/88	17/2030	0.53067	0.661646	0.484163	396536	1
BP	GO:0016358	dendrite development	1/88	17/2030	0.53067	0.661646	0.484163	396035	1
BP	GO:0030010	establishment of cell polarity	1/88	17/2030	0.53067	0.661646	0.484163	419106	1
BP	GO:0040013	negative regulation of locomotion	1/88	17/2030	0.53067	0.661646	0.484163	419106	1
BP	GO:0043488	regulation of mRNA stability	1/88	17/2030	0.53067	0.661646	0.484163	420617	1
BP	GO:0046660	female sex differentiation	1/88	17/2030	0.53067	0.661646	0.484163	373887	1
BP	GO:0050708	regulation of protein secretion	1/88	17/2030	0.53067	0.661646	0.484163	395337	1
BP	GO:0050769	positive regulation of neurogenesis	1/88	17/2030	0.53067	0.661646	0.484163	395337	1
BP	GO:0050803	regulation of synapse structure or activity	1/88	17/2030	0.53067	0.661646	0.484163	396035	1
BP	GO:0050807	regulation of synapse organization	1/88	17/2030	0.53067	0.661646	0.484163	396035	1
BP	GO:0061013	regulation of mRNA catabolic process	1/88	17/2030	0.53067	0.661646	0.484163	420617	1
BP	GO:0062197	cellular response to chemical stress	1/88	17/2030	0.53067	0.661646	0.484163	395337	1
BP	GO:1901888	regulation of cell junction assembly	1/88	17/2030	0.53067	0.661646	0.484163	395241	1
BP	GO:0044085	cellular component biogenesis	14/88	320/2030	0.531844	0.662343	0.484673	396536/396328/395207/419222/374148/396073/415797/374007/395844/395801/426883/395241/373926/395594	14
BP	GO:0006810	transport	18/88	414/2030	0.538415	0.66975	0.490093	423504/396536/373887/395971/395895/396328/396197/395337/396073/408251/420617/419106/374211/414871/426883/771113/417489/395594	18
BP	GO:0090407	organophosphate biosynthetic process	3/88	65/2030	0.542126	0.673589	0.492902	396536/395971/428583	3
BP	GO:0006575	cellular modified amino acid metabolic process	1/88	18/2030	0.551187	0.678578	0.496553	419106	1
BP	GO:0009267	cellular response to starvation	1/88	18/2030	0.551187	0.678578	0.496553	396197	1
BP	GO:0009953	dorsal/ventral pattern formation	1/88	18/2030	0.551187	0.678578	0.496553	396381	1
BP	GO:0014902	myotube differentiation	1/88	18/2030	0.551187	0.678578	0.496553	396073	1
BP	GO:0034504	protein localization to nucleus	1/88	18/2030	0.551187	0.678578	0.496553	374148	1
BP	GO:0043487	regulation of RNA stability	1/88	18/2030	0.551187	0.678578	0.496553	420617	1
BP	GO:0043523	regulation of neuron apoptotic process	1/88	18/2030	0.551187	0.678578	0.496553	419106	1
BP	GO:0098732	macromolecule deacylation	1/88	18/2030	0.551187	0.678578	0.496553	395241	1
BP	GO:1901575	organic substance catabolic process	8/88	186/2030	0.566063	0.69401	0.507846	396329/396287/395337/374148/420617/374211/395818/396218	8
BP	GO:0001704	formation of primary germ layer	1/88	19/2030	0.570817	0.69401	0.507846	396381	1
BP	GO:0030900	forebrain development	1/88	19/2030	0.570817	0.69401	0.507846	396381	1
BP	GO:0031047	RNA-mediated gene silencing	1/88	19/2030	0.570817	0.69401	0.507846	395337	1
BP	GO:0031330	negative regulation of cellular catabolic process	1/88	19/2030	0.570817	0.69401	0.507846	420617	1
BP	GO:0031669	cellular response to nutrient levels	1/88	19/2030	0.570817	0.69401	0.507846	396197	1
BP	GO:0042594	response to starvation	1/88	19/2030	0.570817	0.69401	0.507846	396197	1
BP	GO:0045088	regulation of innate immune response	1/88	19/2030	0.570817	0.69401	0.507846	554219	1
BP	GO:0050804	modulation of chemical synaptic transmission	1/88	19/2030	0.570817	0.69401	0.507846	395971	1
BP	GO:0051402	neuron apoptotic process	1/88	19/2030	0.570817	0.69401	0.507846	419106	1
BP	GO:0099177	regulation of trans-synaptic signaling	1/88	19/2030	0.570817	0.69401	0.507846	395971	1
BP	GO:0006338	chromatin remodeling	2/88	45/2030	0.589226	0.70801	0.51809	374148/419106	2
BP	GO:0019953	sexual reproduction	2/88	45/2030	0.589226	0.70801	0.51809	374148/395801	2
BP	GO:0007281	germ cell development	1/88	20/2030	0.589598	0.70801	0.51809	395801	1
BP	GO:0016042	lipid catabolic process	1/88	20/2030	0.589598	0.70801	0.51809	374211	1
BP	GO:0016054	organic acid catabolic process	1/88	20/2030	0.589598	0.70801	0.51809	374211	1
BP	GO:0030308	negative regulation of cell growth	1/88	20/2030	0.589598	0.70801	0.51809	395801	1
BP	GO:0045927	positive regulation of growth	1/88	20/2030	0.589598	0.70801	0.51809	395241	1
BP	GO:0046395	carboxylic acid catabolic process	1/88	20/2030	0.589598	0.70801	0.51809	374211	1
BP	GO:0051028	mRNA transport	1/88	20/2030	0.589598	0.70801	0.51809	420617	1
BP	GO:1901214	regulation of neuron death	1/88	20/2030	0.589598	0.70801	0.51809	419106	1
BP	GO:2001233	regulation of apoptotic signaling pathway	1/88	20/2030	0.589598	0.70801	0.51809	395818	1
BP	GO:0065003	protein-containing complex assembly	7/88	166/2030	0.590228	0.70801	0.51809	396328/395207/374148/395844/426883/395241/373926	7
BP	GO:0051493	regulation of cytoskeleton organization	2/88	46/2030	0.601396	0.717608	0.525113	396536/419263	2
BP	GO:0051656	establishment of organelle localization	2/88	46/2030	0.601396	0.717608	0.525113	395971/417489	2
BP	GO:0051234	establishment of localization	18/88	428/2030	0.602298	0.717608	0.525113	423504/396536/373887/395971/395895/396328/396197/395337/396073/408251/420617/419106/374211/414871/426883/771113/417489/395594	18
BP	GO:0044087	regulation of cellular component biogenesis	3/88	71/2030	0.603345	0.717608	0.525113	396536/374148/395241	3
BP	GO:1901137	carbohydrate derivative biosynthetic process	3/88	71/2030	0.603345	0.717608	0.525113	428583/395801/395594	3
BP	GO:0007163	establishment or maintenance of cell polarity	1/88	21/2030	0.607566	0.717608	0.525113	419106	1
BP	GO:0032886	regulation of microtubule-based process	1/88	21/2030	0.607566	0.717608	0.525113	419263	1
BP	GO:0042176	regulation of protein catabolic process	1/88	21/2030	0.607566	0.717608	0.525113	374148	1
BP	GO:0044262	cellular carbohydrate metabolic process	1/88	21/2030	0.607566	0.717608	0.525113	395594	1
BP	GO:0051053	negative regulation of DNA metabolic process	1/88	21/2030	0.607566	0.717608	0.525113	419106	1
BP	GO:0071478	cellular response to radiation	1/88	21/2030	0.607566	0.717608	0.525113	419106	1
BP	GO:0071559	response to transforming growth factor beta	1/88	21/2030	0.607566	0.717608	0.525113	374148	1
BP	GO:0071560	cellular response to transforming growth factor beta stimulus	1/88	21/2030	0.607566	0.717608	0.525113	374148	1
BP	GO:1901654	response to ketone	1/88	21/2030	0.607566	0.717608	0.525113	423504	1
BP	GO:0016049	cell growth	2/88	47/2030	0.613298	0.722001	0.528328	374148/395801	2
BP	GO:0031329	regulation of cellular catabolic process	2/88	47/2030	0.613298	0.722001	0.528328	395337/420617	2
BP	GO:0034655	nucleobase-containing compound catabolic process	2/88	47/2030	0.613298	0.722001	0.528328	395337/420617	2
BP	GO:0050877	nervous system process	4/88	98/2030	0.624101	0.728522	0.5331	373887/419824/418125/395686	4
BP	GO:0002831	regulation of response to biotic stimulus	1/88	22/2030	0.624755	0.728522	0.5331	554219	1
BP	GO:0009895	negative regulation of catabolic process	1/88	22/2030	0.624755	0.728522	0.5331	420617	1
BP	GO:0045926	negative regulation of growth	1/88	22/2030	0.624755	0.728522	0.5331	395801	1
BP	GO:0070997	neuron death	1/88	22/2030	0.624755	0.728522	0.5331	419106	1
BP	GO:0001525	angiogenesis	2/88	48/2030	0.624931	0.728522	0.5331	395801/100858404	2
BP	GO:0006417	regulation of translation	2/88	48/2030	0.624931	0.728522	0.5331	395337/420617	2
BP	GO:0016570	histone modification	2/88	48/2030	0.624931	0.728522	0.5331	419106/395241	2
BP	GO:0051668	localization within membrane	2/88	48/2030	0.624931	0.728522	0.5331	419184/771113	2
BP	GO:0034645	cellular macromolecule biosynthetic process	6/88	148/2030	0.631149	0.734975	0.537821	396536/428583/395337/420617/395801/395594	6
BP	GO:0007015	actin filament organization	2/88	49/2030	0.636296	0.740167	0.541621	396473/396536	2
BP	GO:0030163	protein catabolic process	3/88	75/2030	0.641115	0.74027	0.541696	396329/374148/395818	3
BP	GO:0015711	organic anion transport	1/88	23/2030	0.6412	0.74027	0.541696	374211	1
BP	GO:0031331	positive regulation of cellular catabolic process	1/88	23/2030	0.6412	0.74027	0.541696	395337	1
BP	GO:0031333	negative regulation of protein-containing complex assembly	1/88	23/2030	0.6412	0.74027	0.541696	374148	1
BP	GO:0051651	maintenance of location in cell	1/88	23/2030	0.6412	0.74027	0.541696	396197	1
BP	GO:0051962	positive regulation of nervous system development	1/88	23/2030	0.6412	0.74027	0.541696	395337	1
BP	GO:1902600	proton transmembrane transport	1/88	23/2030	0.6412	0.74027	0.541696	771113	1
BP	GO:1901566	organonitrogen compound biosynthetic process	9/88	223/2030	0.644566	0.743358	0.543956	396536/395971/428583/395337/420617/419106/395801/100359387/395594	9
BP	GO:0034248	regulation of amide metabolic process	2/88	50/2030	0.647394	0.74582	0.545758	395337/420617	2
BP	GO:1901565	organonitrogen compound catabolic process	4/88	102/2030	0.656057	0.751978	0.550264	396329/396287/374148/395818	4
BP	GO:0007283	spermatogenesis	1/88	24/2030	0.656933	0.751978	0.550264	374148	1
BP	GO:0048232	male gamete generation	1/88	24/2030	0.656933	0.751978	0.550264	374148	1
BP	GO:0051261	protein depolymerization	1/88	24/2030	0.656933	0.751978	0.550264	419263	1
BP	GO:0060326	cell chemotaxis	1/88	24/2030	0.656933	0.751978	0.550264	395551	1
BP	GO:0060560	developmental growth involved in morphogenesis	1/88	24/2030	0.656933	0.751978	0.550264	374148	1
BP	GO:0098771	inorganic ion homeostasis	2/88	52/2030	0.668796	0.764744	0.559606	396287/396256	2
BP	GO:0044281	small molecule metabolic process	7/88	179/2030	0.671943	0.765135	0.559892	396221/396536/395971/374148/374211/395844/100359387	7
BP	GO:0008202	steroid metabolic process	1/88	25/2030	0.671982	0.765135	0.559892	396536	1
BP	GO:0016051	carbohydrate biosynthetic process	1/88	25/2030	0.671982	0.765135	0.559892	395594	1
BP	GO:0110053	regulation of actin filament organization	1/88	25/2030	0.671982	0.765135	0.559892	396536	1
BP	GO:0033036	macromolecule localization	10/88	253/2030	0.675116	0.767891	0.561908	419184/396536/373887/395337/396035/374148/408251/420617/374211/771113	10
BP	GO:0120035	regulation of plasma membrane bounded cell projection organization	2/88	53/2030	0.679104	0.770797	0.564035	395214/419106	2
BP	GO:2000112	regulation of cellular macromolecule biosynthetic process	2/88	53/2030	0.679104	0.770797	0.564035	395337/420617	2
BP	GO:0006518	peptide metabolic process	4/88	106/2030	0.68619	0.774967	0.567086	395337/420617/395266/100359387	4
BP	GO:0010035	response to inorganic substance	1/88	26/2030	0.686379	0.774967	0.567086	395337	1
BP	GO:0044282	small molecule catabolic process	1/88	26/2030	0.686379	0.774967	0.567086	374211	1
BP	GO:0045862	positive regulation of proteolysis	1/88	26/2030	0.686379	0.774967	0.567086	395818	1
BP	GO:0051223	regulation of protein transport	1/88	26/2030	0.686379	0.774967	0.567086	395337	1
BP	GO:0099536	synaptic signaling	2/88	55/2030	0.698946	0.783936	0.573649	395971/396236	2
BP	GO:0006402	mRNA catabolic process	1/88	27/2030	0.700151	0.783936	0.573649	420617	1
BP	GO:0006631	fatty acid metabolic process	1/88	27/2030	0.700151	0.783936	0.573649	374148	1
BP	GO:0006874	intracellular calcium ion homeostasis	1/88	27/2030	0.700151	0.783936	0.573649	396256	1
BP	GO:0070588	calcium ion transmembrane transport	1/88	27/2030	0.700151	0.783936	0.573649	395895	1
BP	GO:0071407	cellular response to organic cyclic compound	1/88	27/2030	0.700151	0.783936	0.573649	395575	1
BP	GO:1901617	organic hydroxy compound biosynthetic process	1/88	27/2030	0.700151	0.783936	0.573649	419106	1
BP	GO:1903829	positive regulation of protein localization	1/88	27/2030	0.700151	0.783936	0.573649	419184	1
BP	GO:0055085	transmembrane transport	5/88	134/2030	0.702994	0.786301	0.57538	395895/396328/414871/426883/771113	5
BP	GO:0022411	cellular component disassembly	2/88	56/2030	0.708486	0.787218	0.57605	395337/419263	2
BP	GO:0051603	proteolysis involved in protein catabolic process	2/88	56/2030	0.708486	0.787218	0.57605	396329/395818	2
BP	GO:0006403	RNA localization	1/88	28/2030	0.713325	0.787218	0.57605	420617	1
BP	GO:0007265	Ras protein signal transduction	1/88	28/2030	0.713325	0.787218	0.57605	396536	1
BP	GO:0010638	positive regulation of organelle organization	1/88	28/2030	0.713325	0.787218	0.57605	396536	1
BP	GO:0043414	macromolecule methylation	1/88	28/2030	0.713325	0.787218	0.57605	419106	1
BP	GO:0050657	nucleic acid transport	1/88	28/2030	0.713325	0.787218	0.57605	420617	1
BP	GO:0050658	RNA transport	1/88	28/2030	0.713325	0.787218	0.57605	420617	1
BP	GO:0051236	establishment of RNA localization	1/88	28/2030	0.713325	0.787218	0.57605	420617	1
BP	GO:0051258	protein polymerization	1/88	28/2030	0.713325	0.787218	0.57605	373926	1
BP	GO:0055074	calcium ion homeostasis	1/88	28/2030	0.713325	0.787218	0.57605	396256	1
BP	GO:0070085	glycosylation	1/88	28/2030	0.713325	0.787218	0.57605	428583	1
BP	GO:0070201	regulation of establishment of protein localization	1/88	28/2030	0.713325	0.787218	0.57605	395337	1
BP	GO:0010608	post-transcriptional regulation of gene expression	2/88	57/2030	0.717777	0.79132	0.579052	395337/420617	2
BP	GO:0051301	cell division	3/88	85/2030	0.72439	0.797206	0.58336	418125/423196/428857	3
BP	GO:0006164	purine nucleotide biosynthetic process	1/88	29/2030	0.725926	0.797206	0.58336	395971	1
BP	GO:0031667	response to nutrient levels	1/88	29/2030	0.725926	0.797206	0.58336	396197	1
BP	GO:0007600	sensory perception	2/88	58/2030	0.726821	0.797206	0.58336	373887/395686	2
BP	GO:0018108	peptidyl-tyrosine phosphorylation	2/88	58/2030	0.726821	0.797206	0.58336	419184/395337	2
BP	GO:0051726	regulation of cell cycle	3/88	86/2030	0.731843	0.801897	0.586792	396536/374148/419106	3
BP	GO:0010243	response to organonitrogen compound	2/88	59/2030	0.735622	0.8044	0.588624	423504/374148	2
BP	GO:0018212	peptidyl-tyrosine modification	2/88	59/2030	0.735622	0.8044	0.588624	419184/395337	2
BP	GO:0015931	nucleobase-containing compound transport	1/88	30/2030	0.737979	0.804524	0.588715	420617	1
BP	GO:0031346	positive regulation of cell projection organization	1/88	30/2030	0.737979	0.804524	0.588715	373887	1
BP	GO:0042391	regulation of membrane potential	1/88	30/2030	0.737979	0.804524	0.588715	414871	1
BP	GO:0043086	negative regulation of catalytic activity	2/88	60/2030	0.744185	0.809649	0.592465	396536/771113	2
BP	GO:0055080	monoatomic cation homeostasis	2/88	60/2030	0.744185	0.809649	0.592465	396287/396256	2
BP	GO:0030509	BMP signaling pathway	1/88	31/2030	0.749508	0.811338	0.593701	395214	1
BP	GO:0032956	regulation of actin cytoskeleton organization	1/88	31/2030	0.749508	0.811338	0.593701	396536	1
BP	GO:0045786	negative regulation of cell cycle	1/88	31/2030	0.749508	0.811338	0.593701	419106	1
BP	GO:0051346	negative regulation of hydrolase activity	1/88	31/2030	0.749508	0.811338	0.593701	396536	1
BP	GO:0072522	purine-containing compound biosynthetic process	1/88	31/2030	0.749508	0.811338	0.593701	395971	1
BP	GO:0009056	catabolic process	8/88	219/2030	0.751161	0.812311	0.594412	396329/396287/395337/374148/420617/374211/395818/396218	8
BP	GO:0050801	monoatomic ion homeostasis	2/88	61/2030	0.752513	0.812955	0.594884	396287/396256	2
BP	GO:0009165	nucleotide biosynthetic process	1/88	32/2030	0.760535	0.819155	0.599421	395971	1
BP	GO:0018205	peptidyl-lysine modification	1/88	32/2030	0.760535	0.819155	0.599421	419106	1
BP	GO:0032970	regulation of actin filament-based process	1/88	32/2030	0.760535	0.819155	0.599421	396536	1
BP	GO:0044283	small molecule biosynthetic process	2/88	63/2030	0.768479	0.826883	0.605076	395844/100359387	2
BP	GO:0006401	RNA catabolic process	1/88	33/2030	0.771082	0.827203	0.60531	420617	1
BP	GO:0032259	methylation	1/88	33/2030	0.771082	0.827203	0.60531	419106	1
BP	GO:1903311	regulation of mRNA metabolic process	1/88	33/2030	0.771082	0.827203	0.60531	420617	1
BP	GO:0030036	actin cytoskeleton organization	3/88	92/2030	0.773324	0.828782	0.606465	396473/396536/396073	3
BP	GO:0030029	actin filament-based process	3/88	93/2030	0.779711	0.833867	0.610187	396473/396536/396073	3
BP	GO:0044265	cellular macromolecule catabolic process	3/88	93/2030	0.779711	0.833867	0.610187	395337/420617/396218	3
BP	GO:0043254	regulation of protein-containing complex assembly	1/88	34/2030	0.78117	0.833867	0.610187	374148	1
BP	GO:1901293	nucleoside phosphate biosynthetic process	1/88	34/2030	0.78117	0.833867	0.610187	395971	1
BP	GO:0006816	calcium ion transport	1/88	35/2030	0.790817	0.842495	0.6165	395895	1
BP	GO:0032984	protein-containing complex disassembly	1/88	35/2030	0.790817	0.842495	0.6165	419263	1
BP	GO:0016192	vesicle-mediated transport	4/88	124/2030	0.798886	0.850248	0.622173	423504/396536/395971/417489	4
BP	GO:1902903	regulation of supramolecular fiber organization	1/88	36/2030	0.800044	0.85064	0.62246	396536	1
BP	GO:0001558	regulation of cell growth	1/88	37/2030	0.808869	0.858143	0.62795	395801	1
BP	GO:0009101	glycoprotein biosynthetic process	1/88	37/2030	0.808869	0.858143	0.62795	395801	1
BP	GO:0043043	peptide biosynthetic process	3/88	98/2030	0.809493	0.858143	0.62795	395337/420617/100359387	3
BP	GO:0019637	organophosphate metabolic process	3/88	99/2030	0.815032	0.863164	0.631624	396536/395971/428583	3
BP	GO:0097190	apoptotic signaling pathway	1/88	38/2030	0.817308	0.864723	0.632766	395818	1
BP	GO:0071702	organic substance transport	8/88	235/2030	0.818577	0.865215	0.633126	396536/373887/395895/395337/408251/420617/374211/395594	8
BP	GO:0043603	amide metabolic process	4/88	129/2030	0.82379	0.869841	0.636511	395337/420617/395266/100359387	4
BP	GO:0048511	rhythmic process	1/88	39/2030	0.825379	0.869841	0.636511	373887	1
BP	GO:0090066	regulation of anatomical structure size	1/88	39/2030	0.825379	0.869841	0.636511	395971	1
BP	GO:1901135	carbohydrate derivative metabolic process	3/88	102/2030	0.830848	0.874748	0.640101	428583/395801/395594	3
BP	GO:0034470	ncRNA processing	1/88	40/2030	0.833097	0.875403	0.64058	395337	1
BP	GO:0052547	regulation of peptidase activity	1/88	40/2030	0.833097	0.875403	0.64058	395818	1
BP	GO:0009100	glycoprotein metabolic process	1/88	41/2030	0.840478	0.882297	0.645625	395801	1
BP	GO:0044092	negative regulation of molecular function	2/88	75/2030	0.846786	0.887109	0.649147	396536/771113	2
BP	GO:0036211	protein modification process	13/88	372/2030	0.847056	0.887109	0.649147	419184/396536/554219/373887/428583/395337/414143/417319/374148/408251/428857/419106/395241	13
BP	GO:0071417	cellular response to organonitrogen compound	1/88	42/2030	0.847535	0.887109	0.649147	374148	1
BP	GO:0005975	carbohydrate metabolic process	1/88	43/2030	0.854284	0.892437	0.653045	395594	1
BP	GO:1901699	cellular response to nitrogen compound	1/88	43/2030	0.854284	0.892437	0.653045	374148	1
BP	GO:0033043	regulation of organelle organization	2/88	77/2030	0.857248	0.894664	0.654675	396536/419263	2
BP	GO:0051641	cellular localization	9/88	276/2030	0.867004	0.903649	0.661249	419184/395971/396197/395337/396035/374148/408251/771113/417489	9
BP	GO:0043604	amide biosynthetic process	3/88	110/2030	0.867536	0.903649	0.661249	395337/420617/100359387	3
BP	GO:0009314	response to radiation	1/88	46/2030	0.872809	0.908045	0.664466	419106	1
BP	GO:0006508	proteolysis	4/88	141/2030	0.873445	0.908045	0.664466	396329/395818/395801/395266	4
BP	GO:0008104	protein localization	6/88	199/2030	0.878246	0.910609	0.666343	419184/395337/396035/374148/408251/771113	6
BP	GO:0007178	transmembrane receptor protein serine/threonine kinase signaling pathway	1/88	47/2030	0.87845	0.910609	0.666343	395214	1
BP	GO:0140694	non-membrane-bounded organelle assembly	1/88	47/2030	0.87845	0.910609	0.666343	396073	1
BP	GO:0070727	cellular macromolecule localization	6/88	200/2030	0.881242	0.912624	0.667817	419184/395337/396035/374148/408251/771113	6
BP	GO:0007010	cytoskeleton organization	5/88	174/2030	0.887496	0.918217	0.67191	396473/396536/374148/396073/419263	5
BP	GO:0043412	macromolecule modification	13/88	390/2030	0.89152	0.920451	0.673545	419184/396536/554219/373887/428583/395337/414143/417319/374148/408251/428857/419106/395241	13
BP	GO:0006163	purine nucleotide metabolic process	1/88	50/2030	0.893932	0.920451	0.673545	395971	1
BP	GO:0007268	chemical synaptic transmission	1/88	50/2030	0.893932	0.920451	0.673545	395971	1
BP	GO:0098916	anterograde trans-synaptic signaling	1/88	50/2030	0.893932	0.920451	0.673545	395971	1
BP	GO:0099537	trans-synaptic signaling	1/88	50/2030	0.893932	0.920451	0.673545	395971	1
BP	GO:0006325	chromatin organization	2/88	87/2030	0.90049	0.926317	0.677837	374148/419106	2
BP	GO:0072521	purine-containing compound metabolic process	1/88	53/2030	0.907462	0.932597	0.682433	395971	1
BP	GO:0080135	regulation of cellular response to stress	1/88	54/2030	0.911581	0.935936	0.684876	395214	1
BP	GO:0044248	cellular catabolic process	5/88	184/2030	0.914416	0.937952	0.686351	396287/395337/420617/374211/396218	5
BP	GO:0030003	intracellular monoatomic cation homeostasis	1/88	55/2030	0.915519	0.938189	0.686524	396256	1
BP	GO:0006873	intracellular monoatomic ion homeostasis	1/88	56/2030	0.919283	0.94115	0.688691	396256	1
BP	GO:0010564	regulation of cell cycle process	1/88	57/2030	0.922881	0.943936	0.69073	374148	1
BP	GO:0033365	protein localization to organelle	1/88	58/2030	0.926321	0.946554	0.692646	374148	1
BP	GO:0009117	nucleotide metabolic process	1/88	59/2030	0.929609	0.948113	0.693786	395971	1
BP	GO:0030162	regulation of proteolysis	1/88	59/2030	0.929609	0.948113	0.693786	395818	1
BP	GO:0006412	translation	2/88	97/2030	0.93138	0.949019	0.69445	395337/420617	2
BP	GO:0000226	microtubule cytoskeleton organization	1/88	61/2030	0.935756	0.952576	0.697052	419263	1
BP	GO:0006753	nucleoside phosphate metabolic process	1/88	62/2030	0.938627	0.954596	0.69853	395971	1
BP	GO:0055086	nucleobase-containing small molecule metabolic process	1/88	65/2030	0.946501	0.961695	0.703725	395971	1
BP	GO:0055082	intracellular chemical homeostasis	1/88	67/2030	0.951187	0.965544	0.706542	396256	1
BP	GO:0007017	microtubule-based process	1/88	72/2030	0.961199	0.973871	0.712635	419263	1
BP	GO:0019725	cellular homeostasis	1/88	72/2030	0.961199	0.973871	0.712635	396256	1
BP	GO:0051276	chromosome organization	1/88	77/2030	0.969177	0.981029	0.717873	395207	1
BP	GO:0070925	organelle assembly	1/88	80/2030	0.97316	0.983857	0.719942	396073	1
BP	GO:0015031	protein transport	2/88	123/2030	0.974963	0.983857	0.719942	395337/408251	2
BP	GO:0016071	mRNA metabolic process	1/88	82/2030	0.975529	0.983857	0.719942	420617	1
BP	GO:0071705	nitrogen compound transport	3/88	160/2030	0.975628	0.983857	0.719942	395337/408251/420617	3
BP	GO:0045184	establishment of protein localization	2/88	128/2030	0.9795	0.986586	0.721939	395337/408251	2
BP	GO:0033554	cellular response to stress	4/88	200/2030	0.980301	0.986586	0.721939	423504/396197/395337/395214	4
BP	GO:0006259	DNA metabolic process	2/88	130/2030	0.981084	0.986586	0.721939	395337/419106	2
BP	GO:0006396	RNA processing	1/88	100/2030	0.989391	0.99401	0.727372	395337	1
BP	GO:0044260	cellular macromolecule metabolic process	8/88	355/2030	0.992333	0.996036	0.728854	396536/428583/395337/420617/419106/395801/396218/395594	8
BP	GO:0007049	cell cycle	3/88	195/2030	0.993463	0.996241	0.729004	396536/374148/419106	3
BP	GO:0051649	establishment of localization in cell	2/88	165/2030	0.995558	0.996774	0.729395	395971/417489	2
BP	GO:0022402	cell cycle process	1/88	120/2030	0.995848	0.996774	0.729395	374148	1
BP	GO:0006996	organelle organization	6/88	359/2030	0.999276	0.999276	0.731225	396473/396536/395207/374148/396073/419263	6
CC	GO:0005576	extracellular region	34/91	299/2075	2.22299e-08	2.62312e-06	2.38679e-06	396329/396536/396023/554219/373887/396243/373914/396276/395551/396197/395337/419076/408251/100858343/418125/423196/396216/428857/395818/396491/395801/396317/395266/419088/395814/396543/396256/396218/771873/396071/373926/373980/395829/395594	34
CC	GO:0005615	extracellular space	25/91	218/2075	2.72299e-06	0.000160656	0.000146181	396329/396536/396023/554219/373887/396243/373914/395551/396197/395337/100858343/418125/396216/428857/395818/396491/395801/395266/419088/395814/396543/396218/771873/373926/395829	25
CC	GO:0030312	external encapsulating structure	11/91	66/2075	9.19896e-05	0.00271369	0.00246919	396243/396276/414143/423196/395686/395801/419088/395814/771873/373926/373980	11
CC	GO:0031012	extracellular matrix	11/91	66/2075	9.19896e-05	0.00271369	0.00246919	396243/396276/414143/423196/395686/395801/419088/395814/771873/373926/373980	11
CC	GO:0062023	collagen-containing extracellular matrix	8/91	37/2075	0.000136119	0.00321242	0.00292298	396243/396276/414143/423196/395686/395814/373926/373980	8
CC	GO:0016342	catenin complex	4/91	12/2075	0.00130807	0.0257254	0.0234076	396035/419222/415797/374007	4
CC	GO:0005886	plasma membrane	31/91	447/2075	0.00328763	0.0554201	0.0504268	423504/396473/373887/395971/395895/396328/417319/396035/395214/419222/419824/396236/427841/415797/374007/396056/395686/428253/396202/395801/396317/417786/395450/395382/414871/419825/426883/771113/419070/417489/395594	31
CC	GO:0005912	adherens junction	4/91	22/2075	0.0138012	0.196178	0.178502	396035/419222/415797/374007	4
CC	GO:0005911	cell-cell junction	6/91	47/2075	0.0151495	0.196178	0.178502	373887/396035/419222/415797/374007/396202	6
CC	GO:0019898	extrinsic component of membrane	5/91	35/2075	0.0166252	0.196178	0.178502	417319/396035/419222/415797/374007	5
CC	GO:0019897	extrinsic component of plasma membrane	4/91	25/2075	0.0215907	0.229753	0.209053	396035/419222/415797/374007	4
CC	GO:0043230	extracellular organelle	3/91	15/2075	0.0253118	0.229753	0.209053	373887/396317/395594	3
CC	GO:0065010	extracellular membrane-bounded organelle	3/91	15/2075	0.0253118	0.229753	0.209053	373887/396317/395594	3
CC	GO:0030424	axon	7/91	71/2075	0.0333035	0.279371	0.2542	396035/419824/374211/396202/417786/419825/419070	7
CC	GO:0005604	basement membrane	3/91	17/2075	0.0355133	0.279371	0.2542	414143/423196/373980	3
CC	GO:0005581	collagen trimer	3/91	18/2075	0.0412954	0.304553	0.277114	396243/396276/771873	3
CC	GO:0098797	plasma membrane protein complex	5/91	50/2075	0.064985	0.446268	0.40606	395895/396035/419222/415797/374007	5
CC	GO:0016528	sarcoplasm	2/91	10/2075	0.0680748	0.446268	0.40606	414143/396269	2
CC	GO:0043005	neuron projection	11/91	155/2075	0.07219	0.448338	0.407943	373887/396035/419824/408251/374211/396202/417786/395382/419263/419825/419070	11
CC	GO:1903561	extracellular vesicle	2/91	12/2075	0.0943713	0.55679	0.506625	373887/395594	2
CC	GO:0070161	anchoring junction	6/91	79/2075	0.129195	0.725956	0.660548	373887/396035/419222/415797/374007/396202	6
CC	GO:0043204	perikaryon	2/91	15/2075	0.138073	0.740575	0.673851	423504/408251	2
CC	GO:0120025	plasma membrane bounded cell projection	13/91	218/2075	0.151913	0.779378	0.709157	373887/396035/419824/408251/396236/374211/396202/417786/395382/419263/419825/771113/419070	13
CC	GO:0042995	cell projection	13/91	230/2075	0.201024	0.950627	0.864978	373887/396035/419824/408251/396236/374211/396202/417786/395382/419263/419825/771113/419070	13
CC	GO:0098978	glutamatergic synapse	2/91	19/2075	0.201404	0.950627	0.864978	373887/395971	2
CC	GO:0000323	lytic vacuole	3/91	46/2075	0.327988	0.999979	0.909883	396329/395818/395594	3
CC	GO:0005764	lysosome	3/91	46/2075	0.327988	0.999979	0.909883	396329/395818/395594	3
CC	GO:0043025	neuronal cell body	2/91	28/2075	0.349718	0.999979	0.909883	423504/408251	2
CC	GO:0070062	extracellular exosome	1/91	10/2075	0.362027	0.999979	0.909883	373887	1
CC	GO:0032587	ruffle membrane	1/91	11/2075	0.390141	0.999979	0.909883	771113	1
CC	GO:0005789	endoplasmic reticulum membrane	6/91	115/2075	0.391746	0.999979	0.909883	396287/428583/396202/395801/395594/396269	6
CC	GO:0042175	nuclear outer membrane-endoplasmic reticulum membrane network	6/91	116/2075	0.399842	0.999979	0.909883	396287/428583/396202/395801/395594/396269	6
CC	GO:0098827	endoplasmic reticulum subcompartment	6/91	116/2075	0.399842	0.999979	0.909883	396287/428583/396202/395801/395594/396269	6
CC	GO:0098796	membrane protein complex	6/91	117/2075	0.407935	0.999979	0.909883	395895/417319/396035/419222/415797/374007	6
CC	GO:0034703	cation channel complex	1/91	12/2075	0.417029	0.999979	0.909883	395895	1
CC	GO:0044297	cell body	2/91	33/2075	0.428892	0.999979	0.909883	423504/408251	2
CC	GO:0000932	P-body	1/91	13/2075	0.442744	0.999979	0.909883	420617	1
CC	GO:0005788	endoplasmic reticulum lumen	1/91	14/2075	0.467337	0.999979	0.909883	396269	1
CC	GO:0140534	endoplasmic reticulum protein-containing complex	1/91	14/2075	0.467337	0.999979	0.909883	428583	1
CC	GO:0009986	cell surface	3/91	58/2075	0.472262	0.999979	0.909883	419184/373887/423196	3
CC	GO:0005773	vacuole	3/91	59/2075	0.483756	0.999979	0.909883	396329/395818/395594	3
CC	GO:0042383	sarcolemma	1/91	15/2075	0.490856	0.999979	0.909883	396236	1
CC	GO:0030139	endocytic vesicle	1/91	16/2075	0.513347	0.999979	0.909883	396536	1
CC	GO:0031256	leading edge membrane	1/91	17/2075	0.534855	0.999979	0.909883	771113	1
CC	GO:0032432	actin filament bundle	1/91	18/2075	0.555423	0.999979	0.909883	396473	1
CC	GO:0005783	endoplasmic reticulum	8/91	184/2075	0.566795	0.999979	0.909883	396287/428583/414143/396202/395801/396218/395594/396269	8
CC	GO:0030054	cell junction	8/91	184/2075	0.566795	0.999979	0.909883	373887/395971/396035/419222/396236/415797/374007/396202	8
CC	GO:0005882	intermediate filament	1/91	19/2075	0.575091	0.999979	0.909883	396056	1
CC	GO:0045111	intermediate filament cytoskeleton	1/91	19/2075	0.575091	0.999979	0.909883	396056	1
CC	GO:0031984	organelle subcompartment	6/91	140/2075	0.586677	0.999979	0.909883	396287/428583/396202/395801/395594/396269	6
CC	GO:0000139	Golgi membrane	3/91	69/2075	0.591506	0.999979	0.909883	373914/395801/395594	3
CC	GO:0001726	ruffle	1/91	20/2075	0.593898	0.999979	0.909883	771113	1
CC	GO:0036477	somatodendritic compartment	3/91	71/2075	0.611291	0.999979	0.909883	423504/373887/408251	3
CC	GO:0036464	cytoplasmic ribonucleoprotein granule	1/91	21/2075	0.611881	0.999979	0.909883	420617	1
CC	GO:0000776	kinetochore	1/91	22/2075	0.629076	0.999979	0.909883	395207	1
CC	GO:0034702	ion channel complex	1/91	22/2075	0.629076	0.999979	0.909883	395895	1
CC	GO:0000779	condensed chromosome centromeric region	1/91	23/2075	0.645517	0.999979	0.909883	395207	1
CC	GO:0030426	growth cone	1/91	24/2075	0.661237	0.999979	0.909883	419070	1
CC	GO:0030427	site of polarized growth	1/91	24/2075	0.661237	0.999979	0.909883	419070	1
CC	GO:0035770	ribonucleoprotein granule	1/91	24/2075	0.661237	0.999979	0.909883	420617	1
CC	GO:0031253	cell projection membrane	1/91	26/2075	0.690638	0.999979	0.909883	771113	1
CC	GO:0005794	Golgi apparatus	5/91	132/2075	0.699816	0.999979	0.909883	373914/414143/395801/415846/395594	5
CC	GO:0030027	lamellipodium	1/91	27/2075	0.704378	0.999979	0.909883	771113	1
CC	GO:0016604	nuclear body	2/91	56/2075	0.714521	0.999979	0.909883	395245/395307	2
CC	GO:0000793	condensed chromosome	1/91	29/2075	0.730071	0.999979	0.909883	395207	1
CC	GO:0150034	distal axon	1/91	29/2075	0.730071	0.999979	0.909883	419070	1
CC	GO:0032993	protein-DNA complex	1/91	30/2075	0.742077	0.999979	0.909883	396073	1
CC	GO:0000775	chromosome centromeric region	1/91	32/2075	0.764526	0.999979	0.909883	395207	1
CC	GO:0090575	RNA polymerase II transcription regulator complex	1/91	32/2075	0.764526	0.999979	0.909883	396073	1
CC	GO:1902495	transmembrane transporter complex	1/91	33/2075	0.775015	0.999979	0.909883	395895	1
CC	GO:0005667	transcription regulator complex	2/91	64/2075	0.781609	0.999979	0.909883	374148/396073	2
CC	GO:0098793	presynapse	1/91	34/2075	0.785041	0.999979	0.909883	395971	1
CC	GO:1990351	transporter complex	1/91	34/2075	0.785041	0.999979	0.909883	395895	1
CC	GO:0016607	nuclear speck	1/91	36/2075	0.803786	0.999979	0.909883	395245	1
CC	GO:0005938	cell cortex	1/91	37/2075	0.812543	0.999979	0.909883	396056	1
CC	GO:0061695	transferase complex transferring phosphorus-containing groups	1/91	37/2075	0.812543	0.999979	0.909883	417319	1
CC	GO:0015629	actin cytoskeleton	2/91	73/2075	0.840373	0.999979	0.909883	396473/396035	2
CC	GO:0045211	postsynaptic membrane	1/91	41/2075	0.843869	0.999979	0.909883	396236	1
CC	GO:0098687	chromosomal region	1/91	44/2075	0.863911	0.999979	0.909883	395207	1
CC	GO:0097060	synaptic membrane	1/91	45/2075	0.870008	0.999979	0.909883	396236	1
CC	GO:0031252	cell leading edge	1/91	48/2075	0.886726	0.999979	0.909883	771113	1
CC	GO:0043235	receptor complex	1/91	49/2075	0.891811	0.999979	0.909883	423504	1
CC	GO:0030425	dendrite	1/91	50/2075	0.896671	0.999979	0.909883	373887	1
CC	GO:0097447	dendritic tree	1/91	50/2075	0.896671	0.999979	0.909883	373887	1
CC	GO:0045202	synapse	3/91	121/2075	0.910633	0.999979	0.909883	373887/395971/396236	3
CC	GO:0048471	perinuclear region of cytoplasm	1/91	55/2075	0.917912	0.999979	0.909883	419070	1
CC	GO:1990234	transferase complex	2/91	94/2075	0.926187	0.999979	0.909883	428583/417319	2
CC	GO:0098794	postsynapse	1/91	58/2075	0.928519	0.999979	0.909883	396236	1
CC	GO:0005654	nucleoplasm	5/91	194/2075	0.939431	0.999979	0.909883	395245/374148/419106/415846/395307	5
CC	GO:0099080	supramolecular complex	4/91	167/2075	0.945021	0.999979	0.909883	396243/395207/420617/396056	4
CC	GO:0005730	nucleolus	1/91	66/2075	0.950625	0.999979	0.909883	415846	1
CC	GO:0098590	plasma membrane region	2/91	107/2075	0.955237	0.999979	0.909883	396236/771113	2
CC	GO:0005740	mitochondrial envelope	1/91	72/2075	0.962626	0.999979	0.909883	396317	1
CC	GO:0012505	endomembrane system	11/91	387/2075	0.968105	0.999979	0.909883	373914/396287/428583/414143/396202/395801/415846/396218/419070/395594/396269	11
CC	GO:0099513	polymeric cytoskeletal fiber	1/91	78/2075	0.971735	0.999979	0.909883	396056	1
CC	GO:0000785	chromatin	1/91	79/2075	0.973023	0.999979	0.909883	419106	1
CC	GO:0098588	bounding membrane of organelle	4/91	194/2075	0.97748	0.999979	0.909883	373914/395801/395594/396269	4
CC	GO:0099081	supramolecular polymer	2/91	128/2075	0.980625	0.999979	0.909883	396243/396056	2
CC	GO:0099512	supramolecular fiber	2/91	128/2075	0.980625	0.999979	0.909883	396243/396056	2
CC	GO:0031974	membrane-enclosed lumen	7/91	299/2075	0.984515	0.999979	0.909883	395245/374148/419106/396317/415846/395307/396269	7
CC	GO:0043233	organelle lumen	7/91	299/2075	0.984515	0.999979	0.909883	395245/374148/419106/396317/415846/395307/396269	7
CC	GO:0070013	intracellular organelle lumen	7/91	299/2075	0.984515	0.999979	0.909883	395245/374148/419106/396317/415846/395307/396269	7
CC	GO:0031981	nuclear lumen	5/91	239/2075	0.985362	0.999979	0.909883	395245/374148/419106/415846/395307	5
CC	GO:0140535	intracellular protein-containing complex	1/91	97/2075	0.988396	0.999979	0.909883	428583	1
CC	GO:0005829	cytosol	6/91	288/2075	0.991789	0.999979	0.909883	423504/396221/395245/396035/420617/374211	6
CC	GO:0005694	chromosome	2/91	150/2075	0.992203	0.999979	0.909883	395207/419106	2
CC	GO:0031090	organelle membrane	7/91	325/2075	0.993234	0.999979	0.909883	373914/396287/428583/396202/395801/395594/396269	7
CC	GO:0031967	organelle envelope	1/91	113/2075	0.994554	0.999979	0.909883	396317	1
CC	GO:0031975	envelope	1/91	113/2075	0.994554	0.999979	0.909883	396317	1
CC	GO:0031982	vesicle	3/91	207/2075	0.996255	0.999979	0.909883	396536/373887/395594	3
CC	GO:1902494	catalytic complex	2/91	187/2075	0.998416	0.999979	0.909883	428583/417319	2
CC	GO:0005856	cytoskeleton	3/91	233/2075	0.998708	0.999979	0.909883	396473/396035/396056	3
CC	GO:0005739	mitochondrion	1/91	147/2075	0.998932	0.999979	0.909883	396317	1
CC	GO:0140513	nuclear protein-containing complex	1/91	147/2075	0.998932	0.999979	0.909883	396073	1
CC	GO:0031410	cytoplasmic vesicle	1/91	190/2075	0.99987	0.999979	0.909883	396536	1
CC	GO:0097708	intracellular vesicle	1/91	190/2075	0.99987	0.999979	0.909883	396536	1
CC	GO:0043228	non-membrane-bounded organelle	7/91	477/2075	0.999979	0.999979	0.909883	396473/395207/396035/420617/396056/419106/415846	7
CC	GO:0043232	intracellular non-membrane-bounded organelle	7/91	477/2075	0.999979	0.999979	0.909883	396473/395207/396035/420617/396056/419106/415846	7
MF	GO:0050839	cell adhesion molecule binding	8/81	38/1850	0.000160035	0.0267894	0.0246161	396035/419222/419824/415797/374007/396202/417786/419825	8
MF	GO:0030545	signaling receptor regulator activity	13/81	101/1850	0.000296016	0.0267894	0.0246161	396536/396023/554219/395551/395337/408251/418125/423196/396216/428857/396543/396256/395829	13
MF	GO:0048018	receptor ligand activity	12/81	97/1850	0.000752177	0.041071	0.037739	396536/554219/395551/395337/408251/418125/423196/396216/428857/396543/396256/395829	12
MF	GO:0030546	signaling receptor activator activity	12/81	99/1850	0.000907646	0.041071	0.037739	396536/554219/395551/395337/408251/418125/423196/396216/428857/396543/396256/395829	12
MF	GO:0140677	molecular function activator activity	15/81	146/1850	0.00118432	0.0428723	0.0393941	396536/554219/395551/395337/408251/418125/423196/396216/427841/428857/395818/396543/396256/378901/395829	15
MF	GO:0005102	signaling receptor binding	15/81	151/1850	0.00168305	0.0507721	0.0466531	396536/396023/554219/395551/395337/408251/418125/423196/396216/428857/419106/395801/396543/396256/395829	15
MF	GO:0045296	cadherin binding	4/81	15/1850	0.00322009	0.077503	0.0712153	396035/419222/415797/374007	4
MF	GO:0005125	cytokine activity	6/81	35/1850	0.00342555	0.077503	0.0712153	554219/395551/395337/396216/396543/395829	6
MF	GO:0098772	molecular function regulator activity	18/81	218/1850	0.0046716	0.093951	0.0863289	396536/396023/554219/395551/395337/417319/408251/418125/423196/396216/427841/428857/395818/396543/396256/378901/771113/395829	18
MF	GO:0070851	growth factor receptor binding	4/81	17/1850	0.00525049	0.0950339	0.087324	395337/396216/428857/419106	4
MF	GO:0001228	DNA-binding transcription activator activity RNA polymerase II-specific	5/81	29/1850	0.00737079	0.121283	0.111444	396104/374148/396073/419106/100858404	5
MF	GO:0001216	DNA-binding transcription activator activity	5/81	32/1850	0.0112756	0.170073	0.156275	396104/374148/396073/419106/100858404	5
MF	GO:0001664	G protein-coupled receptor binding	5/81	34/1850	0.0145485	0.175552	0.161309	395551/408251/396543/396256/395829	5
MF	GO:0005126	cytokine receptor binding	5/81	34/1850	0.0145485	0.175552	0.161309	554219/395551/395337/396216/419106	5
MF	GO:0008083	growth factor activity	5/81	34/1850	0.0145485	0.175552	0.161309	395337/418125/423196/396216/428857	5
MF	GO:0022843	voltage-gated monoatomic cation channel activity	3/81	15/1850	0.0251404	0.284401	0.261328	395895/396328/414871	3
MF	GO:0000981	DNA-binding transcription factor activity RNA polymerase II-specific	14/81	186/1850	0.027636	0.294242	0.270371	396104/395245/396382/374148/396073/419106/395862/396381/395575/396431/395307/100858404/395231/396397	14
MF	GO:0042277	peptide binding	3/81	17/1850	0.0352839	0.349168	0.320841	396536/373887/395382	3
MF	GO:0003700	DNA-binding transcription factor activity	14/81	193/1850	0.036653	0.349168	0.320841	396104/395245/396382/374148/396073/419106/395862/396381/395575/396431/395307/100858404/395231/396397	14
MF	GO:0005244	voltage-gated monoatomic ion channel activity	3/81	18/1850	0.041035	0.353683	0.324989	395895/396328/414871	3
MF	GO:0022832	voltage-gated channel activity	3/81	18/1850	0.041035	0.353683	0.324989	395895/396328/414871	3
MF	GO:0005201	extracellular matrix structural constituent	3/81	19/1850	0.0472295	0.371676	0.341523	396243/395686/771873	3
MF	GO:0030246	carbohydrate binding	3/81	19/1850	0.0472295	0.371676	0.341523	414143/396491/396202	3
MF	GO:0031406	carboxylic acid binding	3/81	21/1850	0.0609088	0.438459	0.402888	396197/414143/374211	3
MF	GO:0099094	ligand-gated monoatomic cation channel activity	3/81	21/1850	0.0609088	0.438459	0.402888	396328/414871/426883	3
MF	GO:0140110	transcription regulator activity	15/81	229/1850	0.0667253	0.438459	0.402888	396104/395245/396382/374148/396073/419106/395862/396381/395575/415846/396431/395307/100858404/395231/396397	15
MF	GO:0004879	nuclear receptor activity	2/81	10/1850	0.0678279	0.438459	0.402888	395575/396431	2
MF	GO:0098531	ligand-activated transcription factor activity	2/81	10/1850	0.0678279	0.438459	0.402888	395575/396431	2
MF	GO:0061629	RNA polymerase II-specific DNA-binding transcription factor binding	3/81	23/1850	0.0762262	0.447972	0.411628	423504/396073/419106	3
MF	GO:0043565	sequence-specific DNA binding	14/81	214/1850	0.0763268	0.447972	0.411628	396104/395245/396382/374148/396073/419106/395862/396381/395575/396431/395307/100858404/395231/396397	14
MF	GO:0033293	monocarboxylic acid binding	2/81	11/1850	0.0806017	0.447972	0.411628	396197/374211	2
MF	GO:0000976	transcription cis-regulatory region binding	13/81	197/1850	0.0819065	0.447972	0.411628	396104/395245/396382/374148/396073/419106/395862/396381/396431/395307/100858404/395231/396397	13
MF	GO:0001067	transcription regulatory region nucleic acid binding	13/81	197/1850	0.0819065	0.447972	0.411628	396104/395245/396382/374148/396073/419106/395862/396381/396431/395307/100858404/395231/396397	13
MF	GO:0000977	RNA polymerase II transcription regulatory region sequence-specific DNA binding	12/81	180/1850	0.0877138	0.447972	0.411628	396104/395245/374148/396073/419106/395862/396381/396431/395307/100858404/395231/396397	12
MF	GO:1990837	sequence-specific double-stranded DNA binding	13/81	200/1850	0.0899991	0.447972	0.411628	396104/395245/396382/374148/396073/419106/395862/396381/396431/395307/100858404/395231/396397	13
MF	GO:0005267	potassium channel activity	2/81	12/1850	0.0940493	0.447972	0.411628	396328/414871	2
MF	GO:0016614	oxidoreductase activity acting on CH-OH group of donors	2/81	12/1850	0.0940493	0.447972	0.411628	396221/395844	2
MF	GO:0016616	oxidoreductase activity acting on the CH-OH group of donors NAD or NADP as acceptor	2/81	12/1850	0.0940493	0.447972	0.411628	396221/395844	2
MF	GO:0019842	vitamin binding	3/81	26/1850	0.102017	0.461628	0.424177	396197/414143/374211	3
MF	GO:0043177	organic acid binding	3/81	26/1850	0.102017	0.461628	0.424177	396197/414143/374211	3
MF	GO:0022836	gated channel activity	4/81	43/1850	0.11574	0.485062	0.445709	395895/396328/414871/426883	4
MF	GO:0022839	monoatomic ion gated channel activity	4/81	43/1850	0.11574	0.485062	0.445709	395895/396328/414871/426883	4
MF	GO:0015276	ligand-gated monoatomic ion channel activity	3/81	28/1850	0.120895	0.485062	0.445709	396328/414871/426883	3
MF	GO:0022834	ligand-gated channel activity	3/81	28/1850	0.120895	0.485062	0.445709	396328/414871/426883	3
MF	GO:0033218	amide binding	3/81	28/1850	0.120895	0.485062	0.445709	396536/373887/395382	3
MF	GO:0046873	metal ion transmembrane transporter activity	4/81	44/1850	0.123275	0.485062	0.445709	395895/396328/414871/426883	4
MF	GO:0031072	heat shock protein binding	2/81	15/1850	0.137645	0.522804	0.480389	423504/396536	2
MF	GO:0005261	monoatomic cation channel activity	4/81	46/1850	0.138959	0.522804	0.480389	395895/396328/414871/426883	4
MF	GO:0003690	double-stranded DNA binding	13/81	216/1850	0.141532	0.522804	0.480389	396104/395245/396382/374148/396073/419106/395862/396381/396431/395307/100858404/395231/396397	13
MF	GO:0016758	hexosyltransferase activity	2/81	16/1850	0.153025	0.55395	0.509009	428583/395594	2
MF	GO:0000987	cis-regulatory region sequence-specific DNA binding	10/81	161/1850	0.160434	0.569385	0.523191	396104/396382/374148/396073/419106/395862/396431/395307/100858404/395231	10
MF	GO:0005096	GTPase activator activity	2/81	17/1850	0.168724	0.587288	0.539643	427841/378901	2
MF	GO:0015079	potassium ion transmembrane transporter activity	2/81	18/1850	0.184685	0.630716	0.579547	396328/414871	2
MF	GO:0004197	cysteine-type endopeptidase activity	2/81	20/1850	0.217189	0.698043	0.641412	396329/395818	2
MF	GO:1901702	salt transmembrane transporter activity	4/81	55/1850	0.218058	0.698043	0.641412	395895/396328/414871/426883	4
MF	GO:0005509	calcium ion binding	6/81	93/1850	0.218719	0.698043	0.641412	419222/415797/374007/395801/396317/771113	6
MF	GO:0008270	zinc ion binding	5/81	74/1850	0.220376	0.698043	0.641412	396236/419106/395575/395266/396431	5
MF	GO:0005216	monoatomic ion channel activity	4/81	56/1850	0.227539	0.698043	0.641412	395895/396328/414871/426883	4
MF	GO:0008233	peptidase activity	4/81	56/1850	0.227539	0.698043	0.641412	396329/395818/395801/395266	4
MF	GO:0008047	enzyme activator activity	3/81	39/1850	0.241995	0.718051	0.659796	427841/395818/378901	3
MF	GO:0140297	DNA-binding transcription factor binding	3/81	39/1850	0.241995	0.718051	0.659796	423504/396073/419106	3
MF	GO:0008201	heparin binding	2/81	22/1850	0.250167	0.719112	0.660772	418125/423196	2
MF	GO:0000978	RNA polymerase II cis-regulatory region sequence-specific DNA binding	9/81	158/1850	0.250299	0.719112	0.660772	396104/374148/396073/419106/395862/396431/395307/100858404/395231	9
MF	GO:0022890	inorganic cation transmembrane transporter activity	4/81	60/1850	0.266444	0.742747	0.68249	395895/396328/414871/426883	4
MF	GO:0019207	kinase regulator activity	2/81	23/1850	0.266733	0.742747	0.68249	417319/771113	2
MF	GO:0004930	G protein-coupled receptor activity	3/81	42/1850	0.278132	0.746594	0.686024	373887/395971/395382	3
MF	GO:0015267	channel activity	4/81	62/1850	0.286365	0.746594	0.686024	395895/396328/414871/426883	4
MF	GO:0022803	passive transmembrane transporter activity	4/81	62/1850	0.286365	0.746594	0.686024	395895/396328/414871/426883	4
MF	GO:0042802	identical protein binding	7/81	123/1850	0.290169	0.746594	0.686024	396536/373887/396073/419106/396218/426883/771113	7
MF	GO:0016705	oxidoreductase activity acting on paired donors with incorporation or reduction of molecular oxygen	2/81	26/1850	0.31633	0.746594	0.686024	396287/414143	2
MF	GO:0030695	GTPase regulator activity	2/81	26/1850	0.31633	0.746594	0.686024	427841/378901	2
MF	GO:0060589	nucleoside-triphosphatase regulator activity	2/81	26/1850	0.31633	0.746594	0.686024	427841/378901	2
MF	GO:0005539	glycosaminoglycan binding	2/81	27/1850	0.332733	0.746594	0.686024	418125/423196	2
MF	GO:0008234	cysteine-type peptidase activity	2/81	27/1850	0.332733	0.746594	0.686024	396329/395818	2
MF	GO:0015318	inorganic molecular entity transmembrane transporter activity	4/81	67/1850	0.337007	0.746594	0.686024	395895/396328/414871/426883	4
MF	GO:0046872	metal ion binding	23/81	479/1850	0.340172	0.746594	0.686024	396243/396287/395895/396197/414143/396382/419222/419076/396236/415797/374007/419106/396381/395801/395575/396317/415846/395266/396431/373926/771113/100359387/396397	23
MF	GO:0016757	glycosyltransferase activity	2/81	28/1850	0.349028	0.746594	0.686024	428583/395594	2
MF	GO:0005319	lipid transporter activity	1/81	10/1850	0.361625	0.746594	0.686024	396536	1
MF	GO:0016798	hydrolase activity acting on glycosyl bonds	1/81	10/1850	0.361625	0.746594	0.686024	396218	1
MF	GO:0016879	ligase activity forming carbon-nitrogen bonds	1/81	10/1850	0.361625	0.746594	0.686024	100359387	1
MF	GO:0050840	extracellular matrix binding	1/81	10/1850	0.361625	0.746594	0.686024	396491	1
MF	GO:0043169	cation binding	23/81	485/1850	0.365712	0.746594	0.686024	396243/396287/395895/396197/414143/396382/419222/419076/396236/415797/374007/419106/396381/395801/395575/396317/415846/395266/396431/373926/771113/100359387/396397	23
MF	GO:0042578	phosphoric ester hydrolase activity	2/81	30/1850	0.381211	0.746594	0.686024	396317/419070	2
MF	GO:0046914	transition metal ion binding	6/81	114/1850	0.382099	0.746594	0.686024	414143/396236/419106/395575/395266/396431	6
MF	GO:0016491	oxidoreductase activity	5/81	93/1850	0.385598	0.746594	0.686024	396221/373914/396287/414143/395844	5
MF	GO:0008289	lipid binding	4/81	72/1850	0.388082	0.746594	0.686024	396197/100858343/374211/395575	4
MF	GO:0042803	protein homodimerization activity	4/81	72/1850	0.388082	0.746594	0.686024	396536/373887/396073/771113	4
MF	GO:0003714	transcription corepressor activity	1/81	11/1850	0.389728	0.746594	0.686024	415846	1
MF	GO:0005496	steroid binding	1/81	11/1850	0.389728	0.746594	0.686024	395575	1
MF	GO:0008237	metallopeptidase activity	1/81	11/1850	0.389728	0.746594	0.686024	395266	1
MF	GO:0016706	2-oxoglutarate-dependent dioxygenase activity	1/81	11/1850	0.389728	0.746594	0.686024	414143	1
MF	GO:0048029	monosaccharide binding	1/81	11/1850	0.389728	0.746594	0.686024	414143	1
MF	GO:0005179	hormone activity	2/81	31/1850	0.397061	0.746594	0.686024	408251/396256	2
MF	GO:0008134	transcription factor binding	3/81	52/1850	0.40031	0.746594	0.686024	423504/396073/419106	3
MF	GO:0008324	monoatomic cation transmembrane transporter activity	4/81	74/1850	0.408437	0.746594	0.686024	395895/396328/414871/426883	4
MF	GO:1901681	sulfur compound binding	2/81	32/1850	0.412728	0.746594	0.686024	418125/423196	2
MF	GO:0003677	DNA binding	16/81	339/1850	0.41285	0.746594	0.686024	396104/396197/395245/396382/374148/396073/419106/395862/396381/395575/396431/395307/100858404/395231/395241/396397	16
MF	GO:0005212	structural constituent of eye lens	1/81	12/1850	0.416608	0.746594	0.686024	396056	1
MF	GO:0008194	UDP-glycosyltransferase activity	1/81	12/1850	0.416608	0.746594	0.686024	395594	1
MF	GO:0019208	phosphatase regulator activity	1/81	12/1850	0.416608	0.746594	0.686024	771113	1
MF	GO:0070888	E-box binding	1/81	12/1850	0.416608	0.746594	0.686024	419106	1
MF	GO:0016887	ATP hydrolysis activity	3/81	54/1850	0.424343	0.752264	0.691234	423504/396317/100359387	3
MF	GO:0017147	Wnt-protein binding	1/81	13/1850	0.442317	0.752264	0.691234	373887	1
MF	GO:0048020	CCR chemokine receptor binding	1/81	13/1850	0.442317	0.752264	0.691234	395551	1
MF	GO:0140662	ATP-dependent protein folding chaperone	1/81	13/1850	0.442317	0.752264	0.691234	423504	1
MF	GO:0030234	enzyme regulator activity	5/81	101/1850	0.456925	0.752264	0.691234	417319/427841/395818/378901/771113	5
MF	GO:0001217	DNA-binding transcription repressor activity	1/81	14/1850	0.466908	0.752264	0.691234	419106	1
MF	GO:0001227	DNA-binding transcription repressor activity RNA polymerase II-specific	1/81	14/1850	0.466908	0.752264	0.691234	419106	1
MF	GO:0005262	calcium channel activity	1/81	14/1850	0.466908	0.752264	0.691234	395895	1
MF	GO:0031625	ubiquitin protein ligase binding	1/81	14/1850	0.466908	0.752264	0.691234	373887	1
MF	GO:0042379	chemokine receptor binding	1/81	14/1850	0.466908	0.752264	0.691234	395551	1
MF	GO:0038023	signaling receptor activity	6/81	127/1850	0.486761	0.752264	0.691234	373887/395971/395214/395575/396431/395382	6
MF	GO:0060089	molecular transducer activity	6/81	127/1850	0.486761	0.752264	0.691234	373887/395971/395214/395575/396431/395382	6
MF	GO:0004175	endopeptidase activity	2/81	37/1850	0.487868	0.752264	0.691234	396329/395818	2
MF	GO:0001221	transcription coregulator binding	1/81	15/1850	0.490426	0.752264	0.691234	419106	1
MF	GO:0004497	monooxygenase activity	1/81	15/1850	0.490426	0.752264	0.691234	396287	1
MF	GO:0019955	cytokine binding	1/81	15/1850	0.490426	0.752264	0.691234	373887	1
MF	GO:0051213	dioxygenase activity	1/81	15/1850	0.490426	0.752264	0.691234	414143	1
MF	GO:0046983	protein dimerization activity	6/81	128/1850	0.494651	0.752369	0.69133	396536/373887/396073/415797/396202/771113	6
MF	GO:0046982	protein heterodimerization activity	2/81	38/1850	0.502187	0.757465	0.696013	373887/396202	2
MF	GO:0015075	monoatomic ion transmembrane transporter activity	4/81	84/1850	0.507555	0.759236	0.69764	395895/396328/414871/426883	4
MF	GO:0044183	protein folding chaperone	1/81	16/1850	0.51292	0.760971	0.699235	423504	1
MF	GO:0030674	protein-macromolecule adaptor activity	1/81	17/1850	0.534432	0.780099	0.716811	373926	1
MF	GO:0051082	unfolded protein binding	1/81	17/1850	0.534432	0.780099	0.716811	423504	1
MF	GO:0044877	protein-containing complex binding	6/81	135/1850	0.548718	0.790992	0.72682	396473/396536/554219/373887/396035/395801	6
MF	GO:0019887	protein kinase regulator activity	1/81	18/1850	0.555006	0.790992	0.72682	771113	1
MF	GO:0044389	ubiquitin-like protein ligase binding	1/81	18/1850	0.555006	0.790992	0.72682	373887	1
MF	GO:0019904	protein domain specific binding	2/81	43/1850	0.569873	0.799589	0.73472	373887/419106	2
MF	GO:0051015	actin filament binding	2/81	43/1850	0.569873	0.799589	0.73472	396473/396035	2
MF	GO:0015085	calcium ion transmembrane transporter activity	1/81	20/1850	0.593496	0.820021	0.753494	395895	1
MF	GO:0016853	isomerase activity	1/81	20/1850	0.593496	0.820021	0.753494	373914	1
MF	GO:0005198	structural molecule activity	5/81	119/1850	0.606818	0.832076	0.764571	396243/396035/396056/395686/771873	5
MF	GO:0005215	transporter activity	5/81	122/1850	0.629534	0.856734	0.787229	396536/395895/396328/414871/426883	5
MF	GO:0005506	iron ion binding	1/81	24/1850	0.66088	0.873133	0.802297	414143	1
MF	GO:0005516	calmodulin binding	1/81	24/1850	0.66088	0.873133	0.802297	396473	1
MF	GO:0016874	ligase activity	1/81	24/1850	0.66088	0.873133	0.802297	100359387	1
MF	GO:0060090	molecular adaptor activity	1/81	24/1850	0.66088	0.873133	0.802297	373926	1
MF	GO:0020037	heme binding	1/81	25/1850	0.675923	0.886536	0.814613	396287	1
MF	GO:0140678	molecular function inhibitor activity	2/81	53/1850	0.684883	0.891825	0.819473	396023/771113	2
MF	GO:0016791	phosphatase activity	1/81	26/1850	0.690306	0.892468	0.820063	396317	1
MF	GO:0046906	tetrapyrrole binding	1/81	27/1850	0.704059	0.903792	0.830469	396287	1
MF	GO:0061134	peptidase regulator activity	1/81	28/1850	0.717209	0.914188	0.840022	395818	1
MF	GO:0000287	magnesium ion binding	1/81	30/1850	0.7418	0.931208	0.85566	771113	1
MF	GO:0022857	transmembrane transporter activity	4/81	113/1850	0.742482	0.931208	0.85566	395895/396328/414871/426883	4
MF	GO:0140657	ATP-dependent activity	3/81	87/1850	0.745995	0.931208	0.85566	423504/396317/100359387	3
MF	GO:0003682	chromatin binding	2/81	61/1850	0.757963	0.939667	0.863433	374148/396073	2
MF	GO:0008092	cytoskeletal protein binding	4/81	117/1850	0.767252	0.944712	0.868069	396473/396035/396202/419263	4
MF	GO:0003779	actin binding	2/81	64/1850	0.781405	0.948675	0.871711	396473/396035	2
MF	GO:0015631	tubulin binding	1/81	34/1850	0.78482	0.948675	0.871711	419263	1
MF	GO:0017111	ribonucleoside triphosphate phosphatase activity	3/81	93/1850	0.786195	0.948675	0.871711	423504/396317/100359387	3
MF	GO:0003712	transcription coregulator activity	1/81	35/1850	0.794418	0.952249	0.874995	415846	1
MF	GO:0019901	protein kinase binding	1/81	36/1850	0.803593	0.95691	0.879277	374148	1
MF	GO:0004857	enzyme inhibitor activity	1/81	38/1850	0.820746	0.958454	0.880696	771113	1
MF	GO:0016462	pyrophosphatase activity	3/81	101/1850	0.831599	0.958454	0.880696	423504/396317/100359387	3
MF	GO:0016817	hydrolase activity acting on acid anhydrides	3/81	101/1850	0.831599	0.958454	0.880696	423504/396317/100359387	3
MF	GO:0016818	hydrolase activity acting on acid anhydrides in phosphorus-containing anhydrides	3/81	101/1850	0.831599	0.958454	0.880696	423504/396317/100359387	3
MF	GO:0019900	kinase binding	1/81	40/1850	0.836418	0.958454	0.880696	374148	1
MF	GO:0004888	transmembrane signaling receptor activity	3/81	102/1850	0.836661	0.958454	0.880696	373887/395971/395382	3
MF	GO:0003729	mRNA binding	1/81	42/1850	0.850735	0.968447	0.889879	420617	1
MF	GO:0019899	enzyme binding	3/81	109/1850	0.868604	0.973183	0.89423	396536/373887/374148	3
MF	GO:0016788	hydrolase activity acting on ester bonds	2/81	79/1850	0.871285	0.973183	0.89423	396317/419070	2
MF	GO:0003676	nucleic acid binding	17/81	478/1850	0.876375	0.973183	0.89423	396104/396197/395245/396382/374148/396073/420617/419106/395862/396381/395575/396431/395307/100858404/395231/395241/396397	17
MF	GO:0016787	hydrolase activity	9/81	276/1850	0.876402	0.973183	0.89423	423504/396329/395818/395801/396317/395266/396218/100359387/419070	9
MF	GO:0005525	GTP binding	1/81	57/1850	0.925153	0.999944	0.918821	396269	1
MF	GO:0019001	guanyl nucleotide binding	1/81	61/1850	0.937798	0.999944	0.918821	396269	1
MF	GO:0032561	guanyl ribonucleotide binding	1/81	61/1850	0.937798	0.999944	0.918821	396269	1
MF	GO:0140096	catalytic activity acting on a protein	6/81	238/1850	0.961035	0.999944	0.918821	396329/373914/414143/395818/395801/395266	6
MF	GO:0003723	RNA binding	2/81	139/1850	0.987798	0.999944	0.918821	374148/420617	2
MF	GO:0097367	carbohydrate derivative binding	6/81	310/1850	0.99634	0.999944	0.918821	423504/100858343/418125/423196/100359387/396269	6
MF	GO:0043168	anion binding	6/81	328/1850	0.998102	0.999944	0.918821	423504/396197/414143/374211/100359387/396269	6
MF	GO:0036094	small molecule binding	6/81	351/1850	0.999207	0.999944	0.918821	423504/396197/414143/374211/100359387/396269	6
MF	GO:0016740	transferase activity	3/81	253/1850	0.999475	0.999944	0.918821	428583/395801/395594	3
MF	GO:0005524	ATP binding	2/81	212/1850	0.999502	0.999944	0.918821	423504/100359387	2
MF	GO:0032559	adenyl ribonucleotide binding	2/81	220/1850	0.999656	0.999944	0.918821	423504/100359387	2
MF	GO:0035639	purine ribonucleoside triphosphate binding	3/81	268/1850	0.999728	0.999944	0.918821	423504/100359387/396269	3
MF	GO:0030554	adenyl nucleotide binding	2/81	230/1850	0.999783	0.999944	0.918821	423504/100359387	2
MF	GO:0032555	purine ribonucleotide binding	3/81	277/1850	0.999818	0.999944	0.918821	423504/100359387/396269	3
MF	GO:0032553	ribonucleotide binding	3/81	278/1850	0.999826	0.999944	0.918821	423504/100359387/396269	3
MF	GO:0017076	purine nucleotide binding	3/81	287/1850	0.999884	0.999944	0.918821	423504/100359387/396269	3
MF	GO:0000166	nucleotide binding	3/81	303/1850	0.999944	0.999944	0.918821	423504/100359387/396269	3
MF	GO:1901265	nucleoside phosphate binding	3/81	303/1850	0.999944	0.999944	0.918821	423504/100359387/396269	3
