# Supplementary material for: Regulation of Follicular Development in Chickens: WIF1 Modulates Granulosa Cell Proliferation and Progesterone Synthesis via Wnt/β-Catenin Signaling Pathway
Source: Int J Mol Sci. 2024 Feb 1;25(3):1788. doi: 10.3390/ijms25031788 (PMC10855829; doi:10.3390/ijms25031788)
Supplement: Supplementary file 1 [file ijms-25-01788-s001.zip › Table S5.xlsx]

## Sheet: KEGG_result
Table S5. Kegg result of DEGs.
ID	Description	GeneRatio	BgRatio	pvalue	p.adjust	qvalue	geneID	Count
gga04060	Cytokine-cytokine receptor interaction	24/209	204/5437	7.12464e-07	8.33582e-05	7.72461e-05	417247/554219/415651/395096/395551/395872/395663/395337/395090/420193/421686/770778/427406/396216/100858177/395082/395324/418943/404671/378930/101750245/419771/374229/422581	24
gga04512	ECM-receptor interaction	12/209	85/5437	8.38867e-05	0.00490737	0.00454754	419184/396213/396243/373946/374209/107051576/424191/421709/771873/396071/373980/417180	12
gga04514	Cell adhesion molecules	12/209	139/5437	0.00686666	0.153216	0.141981	419184/419222/419824/419762/101749507/422287/428309/428253/396202/417786/419825/769500	12
gga00270	Cysteine and methionine metabolism	6/209	45/5437	0.00698449	0.153216	0.141981	396221/427263/424381/424716/418840/418544	6
gga01230	Biosynthesis of amino acids	7/209	59/5437	0.0070003	0.153216	0.141981	427263/424381/424716/415746/417540/428994/418544	7
gga04916	Melanogenesis	9/209	91/5437	0.00785721	0.153216	0.141981	373887/408082/374059/429040/395235/428333/396543/395230/395829	9
gga00730	Thiamine metabolism	3/209	13/5437	0.0120363	0.169969	0.157506	396317/430522/100859876	3
gga00260	Glycine serine and threonine metabolism	5/209	37/5437	0.0127972	0.169969	0.157506	427263/424381/424716/417540/418544	5
gga04623	Cytosolic DNA-sensing pathway	6/209	53/5437	0.0152807	0.169969	0.157506	554219/395551/395337/100858177/427105/101750245	6
gga04620	Toll-like receptor signaling pathway	8/209	85/5437	0.0158288	0.169969	0.157506	554219/395551/395872/395337/100858177/395818/404671/101750245	8
gga04510	Focal adhesion	14/209	193/5437	0.01598	0.169969	0.157506	396213/396243/373946/374209/395742/424191/415578/431265/416734/421709/771873/396071/373980/417180	14
gga04080	Neuroactive ligand-receptor interaction	22/209	357/5437	0.0179721	0.175228	0.162379	395971/431581/408082/428980/420453/395329/420979/408251/396138/416280/422770/112532887/428072/396431/396256/101751123/428425/418489/428632/395581/419906/373933	22
gga04020	Calcium signaling pathway	15/209	235/5437	0.0359708	0.323737	0.299999	395971/395895/415958/396135/408082/395742/395394/422827/424412/428857/421508/395324/395581/100857277/373933	15
gga04142	Lysosome	9/209	122/5437	0.0443406	0.370561	0.34339	428163/396329/425576/417829/415320/422712/427854/424961/395818	9
gga00563	Glycosylphosphatidylinositol (GPI)-anchor biosynthesis	3/209	23/5437	0.0563096	0.439215	0.40701	428583/417650/429144	3
gga04622	RIG-I-like receptor signaling pathway	5/209	58/5437	0.0708184	0.517859	0.479888	554219/395872/100858177/404671/101750245	5
gga00790	Folate biosynthesis	3/209	28/5437	0.0907404	0.624508	0.578716	396317/100859876/771761	3
gga00053	Ascorbate and aldarate metabolism	2/209	15/5437	0.111267	0.633388	0.586946	424028/107052518	2
gga00230	Purine metabolism	8/209	128/5437	0.118497	0.633388	0.586946	424700/423826/418538/418840/769860/421833/430522/395092	8
gga03460	Fanconi anemia pathway	4/209	50/5437	0.12448	0.633388	0.586946	101750641/415383/395128/769039	4
gga04261	Adrenergic signaling in cardiomyocytes	8/209	131/5437	0.130425	0.633388	0.586946	395895/415958/417319/768444/421508/395947/428333/395350	8
gga04621	NOD-like receptor signaling pathway	8/209	131/5437	0.130425	0.633388	0.586946	396329/421684/554219/395872/395337/100858343/100858177/101750245	8
gga00220	Arginine biosynthesis	2/209	17/5437	0.137203	0.633388	0.586946	415746/428994	2
gga00511	Other glycan degradation	2/209	17/5437	0.137203	0.633388	0.586946	415320/422712	2
gga04310	Wnt signaling pathway	9/209	154/5437	0.137399	0.633388	0.586946	417831/373887/415568/374059/429040/395235/396543/395230/395829	9
gga04216	Ferroptosis	3/209	34/5437	0.140753	0.633388	0.586946	396287/428731/424275	3
gga00531	Glycosaminoglycan degradation	2/209	18/5437	0.150625	0.652709	0.60485	417829/415320	2
gga01200	Carbon metabolism	6/209	98/5437	0.174328	0.688995	0.638475	427263/424381/415746/417540/428994/395218	6
gga00340	Histidine metabolism	2/209	20/5437	0.178171	0.688995	0.638475	421012/100359387	2
gga04672	Intestinal immune network for IgA production	3/209	38/5437	0.178171	0.688995	0.638475	395337/395324/374229	3
gga04330	Notch signaling pathway	4/209	58/5437	0.182554	0.688995	0.638475	415568/428365/395128/769039	4
gga04814	Motor proteins	10/209	190/5437	0.194452	0.710966	0.658835	424849/100858984/421161/418751/107050879/416818/419085/395350/430317/417314	10
gga00330	Arginine and proline metabolism	3/209	42/5437	0.21794	0.7661	0.709926	770734/421012/100359387	3
gga03320	PPAR signaling pathway	4/209	63/5437	0.222627	0.7661	0.709926	428164/396536/100859721/422678	4
gga00860	Porphyrin metabolism	2/209	26/5437	0.263951	0.858189	0.795263	396287/424028	2
gga00410	beta-Alanine metabolism	2/209	27/5437	0.278405	0.858189	0.795263	421012/100359387	2
gga04340	Hedgehog signaling pathway	3/209	48/5437	0.280394	0.858189	0.795263	422460/420391/395801	3
gga04260	Cardiac muscle contraction	4/209	70/5437	0.281997	0.858189	0.795263	395895/768444/421508/395350	4
gga05164	Influenza A	7/209	139/5437	0.286063	0.858189	0.795263	554219/395872/395337/100858177/404671/101750245/416488	7
gga04150	mTOR signaling pathway	7/209	144/5437	0.316965	0.927124	0.859143	373887/415832/374059/429040/395235/396543/395829	7
gga04012	ErbB signaling pathway	4/209	79/5437	0.361137	0.960796	0.890346	431265/428752/416734/428937	4
gga04350	TGF-beta signaling pathway	5/209	104/5437	0.370614	0.960796	0.890346	395214/424857/395862/112530287/395814	5
gga00603	Glycosphingolipid biosynthesis - globo and isoglobo series	1/209	12/5437	0.375541	0.960796	0.890346	415320	1
gga03450	Non-homologous end-joining	1/209	12/5437	0.375541	0.960796	0.890346	424205	1
gga00250	Alanine aspartate and glutamate metabolism	2/209	34/5437	0.37806	0.960796	0.890346	415746/428994	2
gga00604	Glycosphingolipid biosynthesis - ganglio series	1/209	13/5437	0.399599	0.960796	0.890346	415320	1
gga01210	2-Oxocarboxylic acid metabolism	1/209	13/5437	0.399599	0.960796	0.890346	415746	1
gga01232	Nucleotide metabolism	4/209	84/5437	0.405241	0.960796	0.890346	423826/418840/421833/430522	4
gga00760	Nicotinate and nicotinamide metabolism	2/209	37/5437	0.419128	0.960796	0.890346	422827/421833	2
gga00140	Steroid hormone biosynthesis	2/209	38/5437	0.432514	0.960796	0.890346	428754/424028	2
gga00450	Selenocompound metabolism	1/209	15/5437	0.444981	0.960796	0.890346	424716	1
gga00533	Glycosaminoglycan biosynthesis - keratan sulfate	1/209	15/5437	0.444981	0.960796	0.890346	428866	1
gga04010	MAPK signaling pathway	11/209	266/5437	0.446222	0.960796	0.890346	395895/395610/768444/395742/421460/395394/415578/424412/428857/428752/770905	11
gga04145	Phagosome	6/209	142/5437	0.466473	0.960796	0.890346	404304/427854/374209/419950/424445/417466	6
gga02010	ABC transporters	2/209	41/5437	0.471654	0.960796	0.890346	373945/423072	2
gga00830	Retinol metabolism	2/209	42/5437	0.48434	0.960796	0.890346	395844/424028	2
gga00910	Nitrogen metabolism	1/209	17/5437	0.486948	0.960796	0.890346	428994	1
gga00564	Glycerophospholipid metabolism	4/209	95/5437	0.4996	0.960796	0.890346	420826/418594/426748/418124	4
gga00100	Steroid biosynthesis	1/209	18/5437	0.506732	0.960796	0.890346	395827	1
gga04270	Vascular smooth muscle contraction	5/209	122/5437	0.50739	0.960796	0.890346	395971/395895/112532887/396256/426748	5
gga00562	Inositol phosphate metabolism	3/209	70/5437	0.50851	0.960796	0.890346	107049248/107055367/107052518	3
gga00513	Various types of N-glycan biosynthesis	2/209	44/5437	0.50914	0.960796	0.890346	415320/421089	2
gga04217	Necroptosis	5/209	127/5437	0.543483	0.980021	0.908162	421684/554219/100858177/768406/101750245	5
gga00532	Glycosaminoglycan biosynthesis - chondroitin sulfate / dermatan sulfate	1/209	20/5437	0.544051	0.980021	0.908162	107051963	1
gga01240	Biosynthesis of cofactors	5/209	128/5437	0.550555	0.980021	0.908162	427263/396317/424028/430522/100859876	5
gga05168	Herpes simplex virus 1 infection	6/209	155/5437	0.552833	0.980021	0.908162	554219/374209/395337/100858177/404671/101750245	6
gga00480	Glutathione metabolism	2/209	49/5437	0.567645	0.988975	0.916459	423209/427638	2
gga00600	Sphingolipid metabolism	2/209	51/5437	0.589605	0.988975	0.916459	415320/415619	2
gga00040	Pentose and glucuronate interconversions	1/209	23/5437	0.594824	0.988975	0.916459	424028	1
gga04744	Phototransduction	1/209	23/5437	0.594824	0.988975	0.916459	395092	1
gga00010	Glycolysis / Gluconeogenesis	2/209	52/5437	0.600272	0.988975	0.916459	396221/395218	2
gga00030	Pentose phosphate pathway	1/209	25/5437	0.625506	0.988975	0.916459	395218	1
gga00592	alpha-Linolenic acid metabolism	1/209	25/5437	0.625506	0.988975	0.916459	426748	1
gga03020	RNA polymerase	1/209	25/5437	0.625506	0.988975	0.916459	427105	1
gga00983	Drug metabolism - other enzymes	2/209	59/5437	0.669123	0.999088	0.925831	424028/417466	2
gga00240	Pyrimidine metabolism	2/209	60/5437	0.678139	0.999088	0.925831	423826/421833	2
gga00561	Glycerolipid metabolism	2/209	60/5437	0.678139	0.999088	0.925831	420826/418124	2
gga00591	Linoleic acid metabolism	1/209	29/5437	0.680103	0.999088	0.925831	426748	1
gga04810	Regulation of actin cytoskeleton	7/209	206/5437	0.685893	0.999088	0.925831	373946/374209/424191/395394/428857/395324/416734	7
gga00640	Propanoate metabolism	1/209	30/5437	0.692466	0.999088	0.925831	396221	1
gga00512	Mucin type O-glycan biosynthesis	1/209	32/5437	0.715783	0.999088	0.925831	416796	1
gga00350	Tyrosine metabolism	1/209	33/5437	0.726773	0.999088	0.925831	771761	1
gga00051	Fructose and mannose metabolism	1/209	35/5437	0.747501	0.999088	0.925831	395218	1
gga00982	Drug metabolism - cytochrome P450	1/209	35/5437	0.747501	0.999088	0.925831	424028	1
gga04114	Oocyte meiosis	3/209	101/5437	0.752589	0.999088	0.925831	421642/420650/420245	3
gga00980	Metabolism of xenobiotics by cytochrome P450	1/209	36/5437	0.75727	0.999088	0.925831	424028	1
gga01250	Biosynthesis of nucleotide sugars	1/209	37/5437	0.766662	0.999088	0.925831	107052518	1
gga00620	Pyruvate metabolism	1/209	38/5437	0.775693	0.999088	0.925831	396221	1
gga00514	Other types of O-glycan biosynthesis	1/209	43/5437	0.815889	0.999088	0.925831	416796	1
gga04218	Cellular senescence	4/209	148/5437	0.828067	0.999088	0.925831	395895/395872/395337/419844	4
gga00565	Ether lipid metabolism	1/209	45/5437	0.829881	0.999088	0.925831	426748	1
gga04540	Gap junction	2/209	84/5437	0.84026	0.999088	0.925831	395581/373933	2
gga04625	C-type lectin receptor signaling pathway	2/209	87/5437	0.854271	0.999088	0.925831	395337/404671	2
gga00520	Amino sugar and nucleotide sugar metabolism	1/209	49/5437	0.85477	0.999088	0.925831	415320	1
gga00590	Arachidonic acid metabolism	1/209	50/5437	0.860403	0.999088	0.925831	426748	1
gga04070	Phosphatidylinositol signaling system	2/209	89/5437	0.862982	0.999088	0.925831	107049248/418124	2
gga03250	Viral life cycle - HIV-1	1/209	51/5437	0.865819	0.999088	0.925831	395324	1
gga04520	Adherens junction	2/209	91/5437	0.871216	0.999088	0.925831	396035/395230	2
gga05132	Salmonella infection	6/209	235/5437	0.896187	0.999088	0.925831	428453/395872/395337/100858984/107050879/395230	6
gga04137	Mitophagy - animal	1/209	64/5437	0.919834	0.999088	0.925831	421577	1
gga04920	Adipocytokine signaling pathway	1/209	64/5437	0.919834	0.999088	0.925831	427535	1
gga04110	Cell cycle	3/209	146/5437	0.925059	0.999088	0.925831	421642/420650/771128	3
gga04115	p53 signaling pathway	1/209	69/5437	0.934264	0.999088	0.925831	424275	1
gga03008	Ribosome biogenesis in eukaryotes	1/209	75/5437	0.948207	0.999088	0.925831	112533598	1
gga04910	Insulin signaling pathway	2/209	122/5437	0.952489	0.999088	0.925831	431265/395218	2
gga04068	FoxO signaling pathway	2/209	123/5437	0.954038	0.999088	0.925831	395337/100857767	2
gga04371	Apelin signaling pathway	2/209	124/5437	0.955539	0.999088	0.925831	417319/421508	2
gga04210	Apoptosis	2/209	125/5437	0.956993	0.999088	0.925831	396329/395818	2
gga04912	GnRH signaling pathway	1/209	84/5437	0.963796	0.999088	0.925831	395895	1
gga04120	Ubiquitin mediated proteolysis	2/209	135/5437	0.969245	0.999088	0.925831	428477/421577	2
gga03013	Nucleocytoplasmic transport	1/209	93/5437	0.974709	0.999088	0.925831	416488	1
gga04141	Protein processing in endoplasmic reticulum	2/209	154/5437	0.983938	0.999088	0.925831	416934/421577	2
gga04530	Tight junction	2/209	158/5437	0.986017	0.999088	0.925831	395895/101749507	2
gga00190	Oxidative phosphorylation	1/209	116/5437	0.989916	0.999088	0.925831	427854	1
gga03010	Ribosome	1/209	124/5437	0.992683	0.999088	0.925831	112533598	1
gga04140	Autophagy - animal	1/209	131/5437	0.994476	0.999088	0.925831	396329	1
gga04144	Endocytosis	2/209	234/5437	0.999088	0.999088	0.925831	107050879/395324	2

## Sheet: GSEA_result
Table S5. GSEA result of DEGs.
ID	Description	setSize	enrichmentScore	NES	pvalue	p.adjust	qvalue	rank	leading_edge	core_enrichment
gga04060	Cytokine-cytokine receptor interaction	182	0.584853	2.04082	8.24639e-10	1.31942e-07	1.14581e-07	2248	tags=44%	list=15%	signal=38%	CCL19/IFNG/LOC395551/IL4/IFNL3A/LOC112532694/EDAR/IL21/CSF2/LOC112532795/TNFRSF13C/TNFRSF13B/CCR2/CCR8L/CCR5/CX3CR1/PRLL/GDF7/CRCBL/IL12B/GDF6/TNFSF8/CXCL14/MSTN/TNFRSF19/IL1B/IFNW1/IL8L1/GDF10/CX3CL1/CD40LG/IL12A/PRL/LOC100858177/LOC100857744/IFNKL1/CSF3/NODAL/CCL20/IL20RA/IL7/TNFSF15/BMP5/CXCR4/CCR7/NGF/BMP3/BMP8A/TNFSF13B/LOC107049250/IL6/IL21R/TNFRSF8/LOC100857191/RELL2/TNFRSF6B/IL10RB/IL10RA…
gga03010	Ribosome	116	-0.527192	-1.93008	3.08229e-06	0.000246583	0.000214138	5758	tags=67%	list=38%	signal=42%	MRPL2/RPS4Y1/RPL26L1/MRPS9/RPS15/RPL21/RPS8/RPL38/RPS13/RPL36A/RPS7/RPL18A/MRPS2/RPL15/RPL36/RPS10/RPL35/LOC107055485/MRPS11/RPS20/MRPL16/RPS3A/RPL14/RPL27A/RPLP1/RPL29/RPL35A/RPS27/RPL10A/RPS14/RPL24/MRPL21/MRPL35/MRPS14/MRPS16/MRPL30/RPS16/MRPL19/MRPL3/MRPL32/RPS3/RPS6/RPS12/RPL39L/RPS27A/MRPL33/RPLP2/RPS2/RPS28/MRPS18C/MRPL20/RSL24D1/MRPS18A/RPL37A/MRPS21/MRPS15/MRPL1/MRPS17/RN5S/RPL3L/MRPL17/…
gga03008	Ribosome biogenesis in eukaryotes	69	-0.610642	-2.0165	5.19006e-06	0.000276803	0.000240382	3590	tags=59%	list=24%	signal=45%	TBL3/UTP18/WDR43/WDR75/NOB1/REXO5/SBDS/RN5S/GAR1/NOL6/NMD3/RPP40/EMG1/MPHOSPH10/DKC1/WDR3/AK6/PWP2/GTPBP4/LOC107049485/LSG1/RPP25L/UTP15/BMS1/UTP6/IMP4/POP5/NOP56/UTP4/POP4/FCF1/RNA5-8S16/LOC112530089/RRP7A/RNA5-8S16/RNA5-8S16/RNA5-8S16/RNA5-8S16/RPP25/IMP3/RNA28S18/RNA18S19/RNA18S19/RNA5-8S16/RNA18S19/RNA5-8S16/RNA5-8S16
gga04142	Lysosome	120	0.518	1.72386	0.000124484	0.00433295	0.00376282	3394	tags=48%	list=22%	signal=37%	ATP6V0A4/CTSK/LIPML5/MANBA/TPP1/SPAM1/CTSA/HEXA/LAMP3/CTSEAL/CTSB/ATP6AP1/GNS/HYAL6/LOC420160/CTSZ/PSAP/CTSD/CTSV/LAMP1/HEXB/ARSB/NAGA/GALC/SMPD1/NPC2/SORT1/GUSB/LAPTM5/IDUA/LAMP2/FUCA1/ASAH1/TCIRG1/DNASE2B/LGMN/GLB1/NAGLU/PPT1/SGSH/CTSH/CD164/AP3S2/LOC107050229/IGF2R/GM2A/LIPA/GLA/CD63/GAA/PLA2G15/SLC17A5/CTSO/AP3B1/AGA/CTSS/AP3S1
gga04514	Cell adhesion molecules	115	0.517465	1.70559	0.000135405	0.00433295	0.00376282	3190	tags=47%	list=21%	signal=37%	LOC107054133/NRCAM/SELE/CLDN23/SLITRK4/CDH4/CNTNAP1/LOC100858925/CTLA4/CD8BP/CD40LG/NFASC/CADM1/PDCD1/NLGN3/CNTN2/CNTN1/NCAM1/NCAM2/CD34/SDC4/NTNG2/CDH15/CD86/CD274/NLGN4/DMA/NLGN1/CDH5/MADCAM1/ALCAM/SDC3/PTPRM/PTPRF/CD4/CLDN16/CLDN10/ITGB1/VCAM1/NEO1/CNTNAP2/BF1/BF2/ITGA6/JAM3/CD88/PTPRS/ITGB2/ITGA8/DMB2/ITGA4/PTPRD/CDH3/NECTIN1
gga04310	Wnt signaling pathway	147	0.477996	1.62858	0.0004523	0.0120613	0.0104743	1240	tags=15%	list=8%	signal=14%	WIF1/FZD10/RSPO4/WNT11/SFRP5/LGR5/WNT5A/WNT3A/WNT8A/ROR2/WNT10A/CAMK2A/WNT6/WNT9A/NFATC2/WNT3/FZD4/RSPO1/RSPO2/WNT11B/WNT2B/TCF7L1
gga04620	Toll-like receptor signaling pathway	80	0.5359	1.68843	0.000835344	0.0190936	0.0165813	2165	tags=25%	list=14%	signal=22%	LOC395551/IL12B/SPP1/IL1B/IFNW1/IL8L1/CTSK/IL12A/LOC100858177/LOC100857744/IFNKL1/IL6/CD86/LY96/LOC768614/MAPK13/CCL4/TRAF3/MAP3K8/NFKBIA
gga04080	Neuroactive ligand-receptor interaction	301	0.383462	1.40253	0.00181888	0.0363777	0.0315912	2063	tags=35%	list=14%	signal=31%	OXT/NTS/GLRA3/HRH1/OPRL1/PTH2R/LOC101751123/P2RY8/P2RY14/HRH4/GLRB/ADM2/PRLL/PTGER4/NTSR1/OPRM1/NPSR1/MCHR1/GRIA3/GABRA3/NMUR2/NPBWR1/NPY6R/ADCYAP1/THRB/CHRNA8/LOC107054855/CHRNG/TAAR2/ADORA2B/LOC428525/LOC772096/CHRND/GRIK1/GRM4/PRL/GRM5/POMC/CALCA/ADORA2A/GRIA1/LOC422929/SCTR/VIPR1/GABRR1/VIPR2/DRD4/F2RL3/PENK/GABRA4/DRD1/HTR1A/HTR1E/AVP/P2RX3/GRM8/TSHR/TRH/GABRP/CALCR/GRIN3A/GRIA4/EDNRB/GABBR2…
gga04916	Melanogenesis	91	0.506391	1.61756	0.00297061	0.0528109	0.0458621	1250	tags=23%	list=8%	signal=21%	FZD10/WNT11/WNT5A/WNT3A/TYR/WNT8A/WNT10A/CAMK2A/ADCY8/KIT/POMC/WNT6/WNT9A/DCT/WNT3/FZD4/ASIP/WNT11B/WNT2B/TCF7L1/EDNRB
gga03460	Fanconi anemia pathway	49	-0.527016	-1.6921	0.00449839	0.0683988	0.0593989	3940	tags=50%	list=26%	signal=37%	USP1/FAAP100/FANCM/CENPX/TOP3A/ATRIP/RMI1/FANCE/ATR/TOP3B/EME2/RAD51/BRCA1/POLN/PALB2/FANCB/EME1/BLM/FAAP24/FANCG/ERCC4/FAN1/HES4/FANCF/HES1
gga01230	Biosynthesis of amino acids	56	0.548694	1.63292	0.00470242	0.0683988	0.0593989	5121	tags=71%	list=34%	signal=47%	PHGDH/CYLY/PSAT1/PYCRL/PSPH/GPT2/CPS1/CTH/ALDH18A1/PAH/ALDOB/CBS/PFKL/PRPS2/TKTL1/ENO2/ASNS/GSL/GOT1/IDH2/MTR/ACO1/PYCR1/GAPDH/PFKP/ALDOC/PKLR/ENO1/ASL1/ACO2/ARG2/MAT1A/SHMT1/GLUL/CS/SRRL/BCAT1/PGAM1/MAT2B/PGK2
gga04261	Adrenergic signaling in cardiomyocytes	124	0.450131	1.50349	0.00518913	0.0691884	0.0600846	2883	tags=34%	list=19%	signal=28%	SLC8A2/MYL3/PIK3R5/POPDC3/CAMK2A/ADCY8/CACNA2D3/RYR2/SCN5A/ATP2B2/MYH7/CACNA1D/CACNA2D1/BVES/AGT/CACNG1/CACNA2D4/CACNG2/PLCB4/MAPK13/KCNK2/CACNA2D2/RAPGEF3/MYO7L2/CACNG3/CACNA1S/ATP1B4/LOC107050028/AGTR2/SLC8A1/CAMK2D/CACNG4/AGTR1/ADCY2/PIK3R6/CREB5/PPP2R2C/PRKCA/ADCY7/ATP1B1/ATP1A1/CACNA1C
gga04110	Cell cycle	141	-0.387007	-1.44686	0.0060896	0.0749489	0.0650872	5639	tags=50%	list=37%	signal=31%	CCND3/MCM5/TFDP2/CDC27/MAU2/E2F5/SFN/RBX1/PRKDC/MCM3/MAD2L1/LOC769000/MCM2/E2F4/ESCO2/CREBBP/SMC3/GADD45A/PDS5A/ANAPC4/TRIP13/PPP2CA/SMC1B/TGFB3/PCNA/CCND2/PPP2R5D/MYC/TTK/CDC45/E2F3/E2F1/TGFB2/DDX11/SMAD4/ESPL1/MTBP/MAD2L2/ANAPC16/CDK7/ANAPC7/ATR/DBF4/CDC16/ORC2/ORC4/CCNB3/CDT1/CCNA1/CDKN2C/WEE2/RBL1/CDC6/CDC23/ZBTB17/CCND1/CCNE1/CCNE2/CDKN2B/CDKN1C/KNL1/TFDP3/CDC7/ORC6/MAD2L1BP/TICRR/CDC25A/DBF…
gga03018	RNA degradation	69	-0.464366	-1.53346	0.00790454	0.0903376	0.078451	4088	tags=48%	list=27%	signal=35%	EXOSC1/DCP1B/CNOT8/TOB1/ENO4/CNOT2/EXOSC9/BTG1/C1D/DIS3L/EXOSC10/PABPC1L/SKIV2L/LSM4/EXOSC8/WDR61/EXOSC2/EDC3/EXOSC7/DCPS/CNOT10/DIS3/PFKM/LSM1/LSM5/LSM8/BTG1L/PAPD5/LSM6/LSM3/EXOSC3/EXOSC6/BTG4
gga04623	Cytosolic DNA-sensing pathway	48	0.555123	1.59378	0.0116988	0.11517	0.100016	2462	tags=29%	list=16%	signal=24%	LOC395551/POLR3G/IL1B/IFNW1/LOC100858177/LOC100857744/IFNKL1/IL6/IL18/LOC768614/CCL4/NFKBIA/TMEM173/DNASE2B
gga04622	RIG-I-like receptor signaling pathway	54	0.5168	1.53434	0.0120388	0.11517	0.100016	2319	tags=24%	list=15%	signal=20%	IL12B/IFNW1/IL8L1/IL12A/LOC100858177/LOC100857744/IFNKL1/LOC768614/MAPK13/TRAF3/NFKBIA/IFIH1/TMEM173
gga05164	Influenza A	125	0.433308	1.44633	0.0122368	0.11517	0.100016	3623	tags=30%	list=24%	signal=23%	IFNG/IL12B/IL1B/IFNW1/IL8L1/IL12A/LOC100858177/LOC100857744/IFNKL1/IL6/KPNA7/LOC428593/IL18/DMA/LOC768614/PLG/TRAF3/SLC25A4/NFKBIA/IFIH1/SOCS3/TMPRSS4/PRKCA/DNAJC3/STAT2/DMB2/PIK3CD/JAK2/CDK6/MX1/BLB1/EIF2AK2/NFKB1/PRKCB/KPNA2/SLC25A6/CASP18/IFNAR1
gga00591	Linoleic acid metabolism	26	-0.588442	-1.61017	0.0147573	0.118058	0.102524	1246	tags=54%	list=8%	signal=49%	CYP3A5/PROCA1/LOC423229/PLA2G4EL2/PLA2G4EL6/PLA2G10/RP11-400G3.5/LOC423226/CYP2J19/PLA2G5/LOC428870/PLA2G1BL/PLA2G2A/LOC771552
gga04512	ECM-receptor interaction	79	0.474393	1.49133	0.0142105	0.118058	0.102524	3385	tags=54%	list=22%	signal=42%	FREM1/COL9A1/SPP1/TNR/IBSP/LAMA2/ITGB3/ITGB6/LAMB4/LAMB2/COL1A2/TNX/ITGA3/SDC4/AGRN/FN1/COL4A6/DAG1/COL4A5/ITGA7/LAMA3/COL6A2/ITGB5/COL4A2/VTN/NPNT/HSPG2/TNC/LAMB3/ITGB1/LAMC1/LOC101748017/ITGA6/LAMC2/COL4A4/COL4A3/ITGA8/ITGA4/ITGA11/THBS1/COL1A1/LAMA4/CD44
gga04145	Phagosome	126	0.426084	1.4236	0.0141521	0.118058	0.102524	4148	tags=42%	list=27%	signal=31%	SFTPA2/ATP6V1G3/ATP6V0A4/ITGB3/LPO/MMR1L3/MRC2/ATP6AP1/PLA2R1/LOC420160/SFTPA1/MBL2/DYNC2H1/DMA/SCARB1/CTSV/LAMP1/ITGB5/C1R/COLEC11/CALR/EPX/ITGB1/MRC1/CALR3/LAMP2/BF1/TCIRG1/BF2/COLEC12/ITGB2/DMB2/CYBA/TLR1A/THBS1/BLB1/DYNC1I1/CTSS/ATP6V0E1/ATP6V1A/LOC417067/SEC61A1/NCF1C/ATP6V1E1/M6PR/ITGA2/TUBA3E/CYBB/CANX/TFRC/RAB7A/ATP6V0D1/ATP6V0A1
gga04020	Calcium signaling pathway	215	0.379355	1.34993	0.0182472	0.139027	0.120734	2633	tags=33%	list=17%	signal=28%	FGF8/FGF4/CACNA1B/HRH1/SLC8A2/FGF19/NTSR1/SLN/CHRNA8/ADORA2B/PLCZ1/CAMK2A/CACNA1E/ADCY8/GRM5/FGF22/RYR2/NFATC2/ADORA2A/MST1/LOC422929/CXCR4/ATP2B2/NGF/PDGFD/DRD1/P2RX3/FGF6/CACNA1D/GRIN3A/EDNRB/FLT4/HTR2A/TRDN/NTRK3/GNA14/VEGFRKDRL/PDE1C/MET/MCOLN3/GRM1/PLCB4/MCOLN2/HTR2C/HTR4/HGF/CCKAR/SLC25A4/CAMK1D/CACNA1S/PDE1B/PLCD4/ASPH/GRIN2A/CYSLTR1/GNAL/BDKRB2/GDNF/MYLK4/NFATC1/SLC8A1/CAMK2D/AGTR1/FGF18/…
gga00592	alpha-Linolenic acid metabolism	23	-0.584074	-1.56473	0.0197144	0.140781	0.122257	1246	tags=48%	list=8%	signal=44%	PROCA1/LOC423229/PLA2G4EL2/PLA2G4EL6/PLA2G10/LOC423226/PLA2G5/LOC428870/PLA2G1BL/PLA2G2A/LOC771552
gga04150	mTOR signaling pathway	142	0.414164	1.40261	0.0202372	0.140781	0.122257	1217	tags=11%	list=8%	signal=10%	FZD10/INS/WNT11/ATP6V1G3/WNT5A/WNT3A/WNT8A/WNT10A/WNT6/WNT9A/WNT3/FZD4/SLC7A5/WNT11B/WNT2B
gga04510	Focal adhesion	187	0.384577	1.35062	0.0224007	0.149338	0.129688	3299	tags=30%	list=22%	signal=24%	MYLPF/COL9A1/SPP1/TNR/IBSP/RASGRF1/LAMA2/ITGB3/PAK5/ITGB6/LAMB4/SHC3/LAMB2/PDGFD/COL1A2/TNX/ITGA3/FLT4/VEGFRKDRL/MET/VASP/FN1/COL4A6/COL4A5/ITGA7/LAMA3/MYL10/COL6A2/ITGB5/HGF/BIRC2/COL4A2/EMP1/TLN1/VTN/TNC/LAMB3/ITGB1/LAMC1/MYLK4/ITGA6/LAMC2/PDGFB/PRKCA/RAPGEF1/COL4A4/COL4A3/CAV1/ITGA8/ITGA4/PIP5K1B/TLN2/PIK3CD/ITGA11/THBS1/COL1A1/LAMA4
gga00410	beta-Alanine metabolism	27	0.607932	1.564	0.0238301	0.152513	0.132445	2642	tags=25%	list=17%	signal=21%	CARNS1/GAD1/CNDP1/ALDH7A1/ALDH6A1/DPYD/GADL1
gga00650	Butanoate metabolism	23	0.622842	1.56295	0.0252274	0.155245	0.134818	104	tags=9%	list=1%	signal=9%	GAD1/ACSM5
gga04141	Protein processing in endoplasmic reticulum	145	0.399027	1.35784	0.0361111	0.213992	0.185835	5324	tags=48%	list=35%	signal=32%	CRYAA/PARK2/DNAJC5B/DERL3/P4HB/RPN2/UGGT2/PDIA3/HSP90B1/HYOU1/PDIA4/DDOST/CALR/STT3A/CRYAB/CALR3/RPN1/SEC23B/LMAN1L/MAGT1/HSPA5/UGGT1/ERP29/DNAJC3/DNAJC1/ERLEC1/TXNDC5/STT3B/ERN2/LMAN2/SEL1L/DNAJC10/PDIA6/UBE2J1/SEC24D/SSR1/DNAJB11/SEC63/UBQLN1/MAN1B1/TRAF2/SEC61A1/SIL1/TUSC3/TRAM1L1/NFE2L2/MAPK10/DAD1/RAD23A/SSR3/CANX/MAP3K5/BAK1/SEC31A/HERPUD1/CAPN1/PREB/DERL1/RAD23B/SEC13/CAPN2/UBE4B/MARCH6/RR…
gga00590	Arachidonic acid metabolism	46	-0.445555	-1.4044	0.048941	0.279663	0.242865	1246	tags=22%	list=8%	signal=20%	PLA2G10/RP11-400G3.5/LOC423226/CYP2J19/PLA2G5/LTC4SL/LOC428870/PLA2G1BL/PLA2G2A/LOC771552

## Sheet: common elements
Common elements in KEGG result and GSEA result and KEGG (p < 0.05) result
gga04060	Cytokine-cytokine receptor interaction
gga04512	ECM-receptor interaction
gga04514	Cell adhesion molecules
gga01230	Biosynthesis of amino acids
gga04916	Melanogenesis
gga04623	Cytosolic DNA-sensing pathway
gga04620	Toll-like receptor signaling pathway
gga04510	Focal adhesion
gga04080	Neuroactive ligand-receptor interaction
gga04020	Calcium signaling pathway
gga04142	Lysosome
